# Supplementary material for: Sustainable construction of value-added naphthoquinones for pharmaceuticals
Source: Royal Society of Chemistry journal article supplement (doi:10.1039/d4gc06053a), 2025-01-01
Supplement: d4gc06053a1.pdf [file d4gc06053a1.pdf]

## Supporting Information-I

### Sustainable construction of value-added naphthoquinones for pharmaceuticals

Sibani Rath, Pinki Lamba, P. Sravan Kumar Reddy, Anugam V. Krishna, and

Dhevalapally B. Ramachary\*

*Catalysis Laboratory, School of Chemistry, University of Hyderabad, Hyderabad-500 046, India;*

*E-mail: [ramsc@uohyd.ac.in](mailto:ramsc@uohyd.ac.in) and [ramchary.db@gmail.com](mailto:ramchary.db@gmail.com)*

| CONTENTS                                                                                         | Page No |
|--------------------------------------------------------------------------------------------------|---------|
| 1. General methods                                                                               | S2      |
| 2. Materials                                                                                     | S2      |
| 3. Table S1. Reaction optimization for one-pot synthesis of 3-benzyl-2-chlorolawsone             | S3      |
| 4. Table S2. Reaction optimization for the synthesis of 3-benzyl-2-chlorolawsone                 | S4      |
| 5. Table S3. Substrate scope for the synthesis of chloro-lawsones                                | S5      |
| 6. Scheme S1-S2: Synthesis of key-intermediates for the total synthesis of <b>8</b> and <b>9</b> | S6      |
| 7. Table S4. Optimization for the synthesis of intermediate <b>7</b>                             | S7      |
| 8. Figure S1: Crystal structure of 3-benzyl-naphthalene-1,2-dione ( <b>2a</b> )                  | S8      |
| 9. Figure S2: Crystal structure of 3-(4-methoxybenzyl)-naphthalene-1,2-dione ( <b>2j</b> )       | S8      |
| 10. Figure S3: Crystal structure of 2-benzyl-naphthalene-1,4-dione ( <b>3a</b> )                 | S8      |
| 11. Figure S4: Crystal structure of 2-(3-fluorobenzyl)-naphthalene-1,4-dione ( <b>3c</b> )       | S9      |
| 12. Figure S5: Crystal structure of 2-benzyl-3-chloronaphthalene-1,4-dione ( <b>4a</b> )         | S9      |
| 13. Figure S6: Crystal structure of intermediate ( <b>7</b> )                                    | S9      |
| 14. Figure S7: Pictorial representation for gram-scale synthesis of <b>4a</b>                    | S10     |
| 15. Figure S8: Pictorial representation for gram-scale synthesis of <b>2a</b>                    | S11     |
| 16. Figure S9: Pictorial representation for gram-scale synthesis of <b>3a</b>                    | S12     |
| 17. General experimental procedures                                                              | S13-S16 |
| 18. Characterization data for compounds                                                          | S17-S51 |
| 19. Table S5-Table S7: Correlation NMR data for the natural products                             | S52-S54 |
| 20. Figure S10: Correlation NMR data for compounds <b>8</b> , <b>9</b> and <b>3s</b> .           | S55-S57 |
| 21. Figure S11: Control experiments: “online NMR experiment”                                     | S58-S62 |
| 22. Figure S12-S13: Control experiments: “online ESI-HRMS experiment”                            | S63-S68 |
| 23. Table S8. X-ray single crystal data for <b>2a</b>                                            | S69     |
| 24. Table S9. X-ray single crystal data for <b>2j</b>                                            | S70     |
| 25. Table S10. X-ray single crystal data for <b>3a</b>                                           | S71     |
| 26. Table S11. X-ray single crystal data for <b>3c</b>                                           | S72     |
| 27. Table S12. X-ray single crystal data for <b>4a</b>                                           | S73     |
| 28. Table S13. X-ray single crystal data for <b>7</b>                                            | S74     |
| 29. References                                                                                   | S75     |

**General Methods:** The  $^1\text{H}$  NMR and  $^{13}\text{C}$  NMR spectra were recorded at 400 MHz and 500 MHz, respectively. The chemical shifts are reported in ppm downfield to TMS ( $\delta = 0$ ) for  $^1\text{H}$  NMR and relative to the central  $\text{CDCl}_3$  resonance ( $\delta = 77.0$ ) for  $^{13}\text{C}$  NMR. In the  $^{13}\text{C}$  NMR spectra, the nature of the carbons (C, CH,  $\text{CH}_2$  or  $\text{CH}_3$ ) was determined by recording the DEPT-135 experiment, and is given in parentheses. The coupling constants  $J$  are given in Hz. Column chromatography was performed using Acme's silica gel (particle size 0.063-0.200 mm). High-resolution mass spectra were recorded on micromass ESI-TOF MS. IR spectra were recorded on JASCO FT/IR-5300. Elemental analyses were recorded on a Thermo Finnigan Flash EA 1112 analyzer. Mass spectra were recorded on either VG7070H mass spectrometer using EI technique or Shimadzu-LCMS-2010 A mass spectrometer. The X-ray diffraction measurements were carried out at 298 K on an automated Enraf-Nonious MACH 3 diffractometer using graphite monochromated, Mo- $K\alpha$  ( $\lambda = 0.71073 \text{ \AA}$ ) radiation with CAD4 software or the X-ray intensity data were measured at 298 K on a Bruker SMART APEX CCD area detector system equipped with a graphite monochromator and a Mo- $K\alpha$  fine-focus sealed tube ( $\lambda = 0.71073 \text{ \AA}$ ). For thin layer chromatography (TLC), silica gel plates Merck 60 F254 were used and compounds were visualized by irradiation with UV light. All the microwave irradiation reactions were performed in a "Monowave 200 Anton Paar microwave reactor".

**Materials:** All solvents and commercially available chemicals were used as received. 3-Alkylawsones **1**, 2-alkyl-3-chloronaphthalene-1,4-diones **4** and other key intermediates for the total synthesis of deoxyneocryptotanshinone and miltirone are synthesized by using literature protocols and gave corresponding references.

**Table S1:** Reaction optimization for the one-pot synthesis of 2-benzyl-3-chloronaphthalene-1,4-dione **4a**<sup>a</sup>

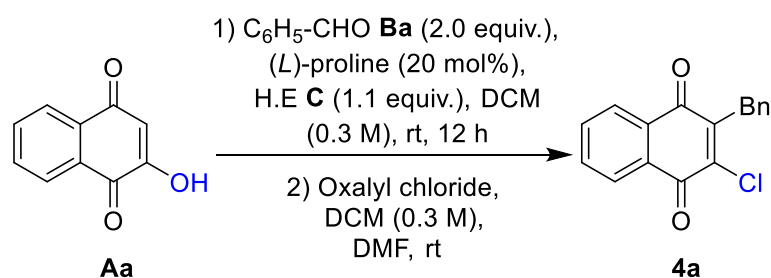

| Entry          | Oxalyl Chloride | DMF | <i>t</i> (h) | Yield (%) <sup>b</sup> |
|----------------|-----------------|-----|--------------|------------------------|
| 1              | 2               | 1.3 | 3            | 71                     |
| 2              | 2               | -   | 18           | 0                      |
| 3 <sup>c</sup> | 2               | 1.3 | 4.5          | 59                     |
| 4              | 3               | 1.5 | 3            | 75                     |
| 5 <sup>d</sup> | 3               | 1.5 | 4            | 31                     |

<sup>a</sup> Reaction was carried out taking **Aa** (0.3 mmol), C<sub>6</sub>H<sub>5</sub>CHO (2.0 equiv.), proline (20 mol%), Hantzsch ester (H. E, 1.1 equiv.), DCM (0.3 M) followed by addition of oxalyl chloride, again DCM (0.3 M) and DMF at rt. <sup>b</sup> Yields refer to the column purified product. <sup>c</sup> After step-1, DCM (0.3 M) was not added in the step-2. <sup>d</sup> 300 mg 4 A° MS was added to the reaction mixture after reductive alkylation.

**Discussion for Table S1:** Initially, lawsone **Aa** (0.3 mmol) was taken and treated with 2.0 equiv. of benzaldehyde **Ba**, 20 mol% of proline, and 1.1 equiv. of Hantzsch ester (HE) in DCM (0.3 M) and stirred at rt for 12 h. After completion of reductive alkylation reaction, again DCM (0.3 M), 2.0 equiv. of oxalyl chloride and 1.3 equiv. of DMF was added and stirred at rt for 3 h to furnishing **4a** in 71% yield (Table S1, entry 1). Next, the one-pot synthesis was performed without adding DMF which resulted in no product **4a** formation (Table S1, entry 2). Without extra addition of DCM (0.3 M) in the chlorination step resulting **4a** in only 59% yield with a long reaction time of 4.5 h (Table S1, entry 3). On increasing the oxalyl chloride amount to 3.0 equiv., product **4a** obtained in 75% yield in 3 h (Table S1, entry 4). Lastly, 300 mg of 4 A° MS was added after step-1 to reduce the H<sub>2</sub>O content and stirred for 15 minutes followed by addition of DCM (0.3 M), 3.0 equiv. of oxalyl chloride and 1.5 equiv. of DMF. Surprisingly, the reaction took 4 h for completion furnishing **4a** in 31% yield (Table S1, entry 5). Thus, we came to the conclusion that, one-pot synthesis of 2-benzyl-3-chloronaphthalene-1,4-dione **4a** from the lawsone **Aa** is not a very good protocol.

**Table S2:** Reaction optimization for the high-yielding synthesis of 2-benzyl-3-chloronaphthalene-1,4-dione **4a**<sup>a</sup>

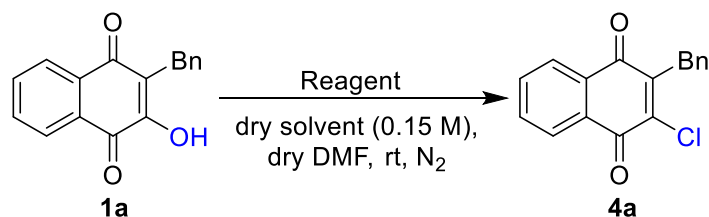

| Entry          | Reagent          | (equiv.) | Solvent | DMF | <i>t</i> (h) | Yield (%) <sup>b</sup> |
|----------------|------------------|----------|---------|-----|--------------|------------------------|
| 1              | Oxalyl chloride  | (2)      | DCM     | 1.3 | 10           | 70                     |
| 2              | Oxalyl chloride  | (4)      | DCM     | 1.3 | 10           | 95                     |
| 3 <sup>c</sup> | Thionyl Chloride | (2)      | DCM     | -   | 10           | -                      |
| 4              | Oxalyl chloride  | (4)      | AcCN    | 1.3 | 10           | 18                     |

<sup>a</sup> Reaction was carried out taking **1a** (0.3 mmol), oxalyl chloride, dry DCM (0.15 M) and dry DMF (1.3 equiv.) under nitrogen atmosphere. <sup>b</sup> Yields refer to the column purified product. <sup>c</sup> 92% of unreacted **1a** was recovered after the reaction.

**Discussion for Table S2:** With this pre-knowledge, we performed the chlorination reaction by taking pure isolated 3-benzylawsone **1a** (0.3 mmol), 2.0 equiv. of oxalyl chloride, dry DCM (0.15 M) and 1.3 equiv. of dry DMF at room temperature under nitrogen atmosphere for 10 h furnished the product **4a** in 70% yield (Table S2, entry 1). On increasing the amount of oxalyl chloride up to 4.0 equiv. furnished the product **4a** in 95% yield in 10 h (Table S2, entry 2). When oxalyl chloride was replaced by 2.0 equiv. of thionyl chloride, reaction did not proceed at all and 92% of unreacted starting material **1a** was recovered back from the reaction mixture (Table S2, entry 3). Lastly, on changing the solvent from dry DCM to dry acetonitrile, **4a** obtained in just 18% yield after 10 h (Table S2, entry 4). Thus, reacting 3-benzylawsone **1a** with 4.0 equiv. of oxalyl chloride, 1.3 equiv. of dry DMF and dry DCM (0.15 M) at room temperature under nitrogen atmosphere for 10 h was finalized as the best optimized condition for the synthesis of 2-alkyl-3-chloronaphthalene-1,4-diones **4**.

**Table S3:** Substrate scope for the synthesis of 2-alkyl-3-chloronaphthalene-1,4-diones **4**<sup>a</sup>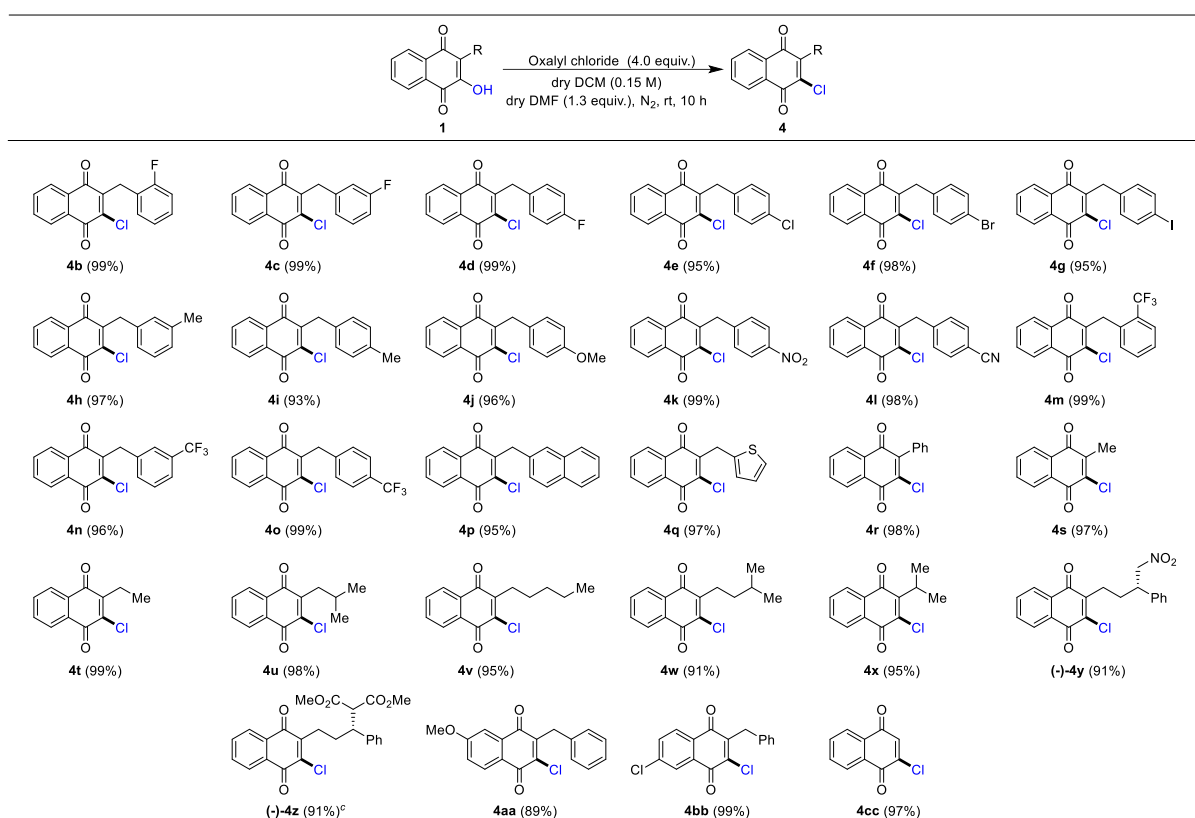

<sup>a</sup> Reaction was carried out taking **1** (0.3 mmol), oxalyl chloride (4.0 equiv.), dry DCM (0.15 M), dry DMF (1.3 equiv.) under nitrogen condition. <sup>b</sup> Yields refer to the column purified product. <sup>c</sup> Reaction completed within 2 h.

**Discussion for Table S3:** After successful optimization, we generated a huge library of 2-alkyl-3-chloronaphthalene-1,4-diones **4** from the corresponding 3-alkyl-1,4-naphthoquinone-2-ols **1** (Table S3). Interestingly, all the three-component reductive *C*-alkylated products containing aromatic, biaryl, heteroaromatic, aliphatic group **1b-x** performed excellently resulting in **4b-x** in 91-99% yield in 10 h (Table S3). Chiral substrates such as (-)-**1y** and (-)-**1z** also resulted in product (-)-**4y** and (-)-**4z** in 91% yield in 10 h and 2 h respectively (Table S3). More functionalized reductive *C*-alkylated products such as **1aa** and **1bb** also afforded **4aa** and **4bb** in 89% and 99% yield respectively. When simple lawsone was subjected in the optimized reaction condition, **4cc** was obtained in 97% yield in 10 h (Table S3).

**Synthesis of key-intermediates for the total synthesis of deoxyneocryptotanshinone and miltirone:<sup>1,2</sup>**

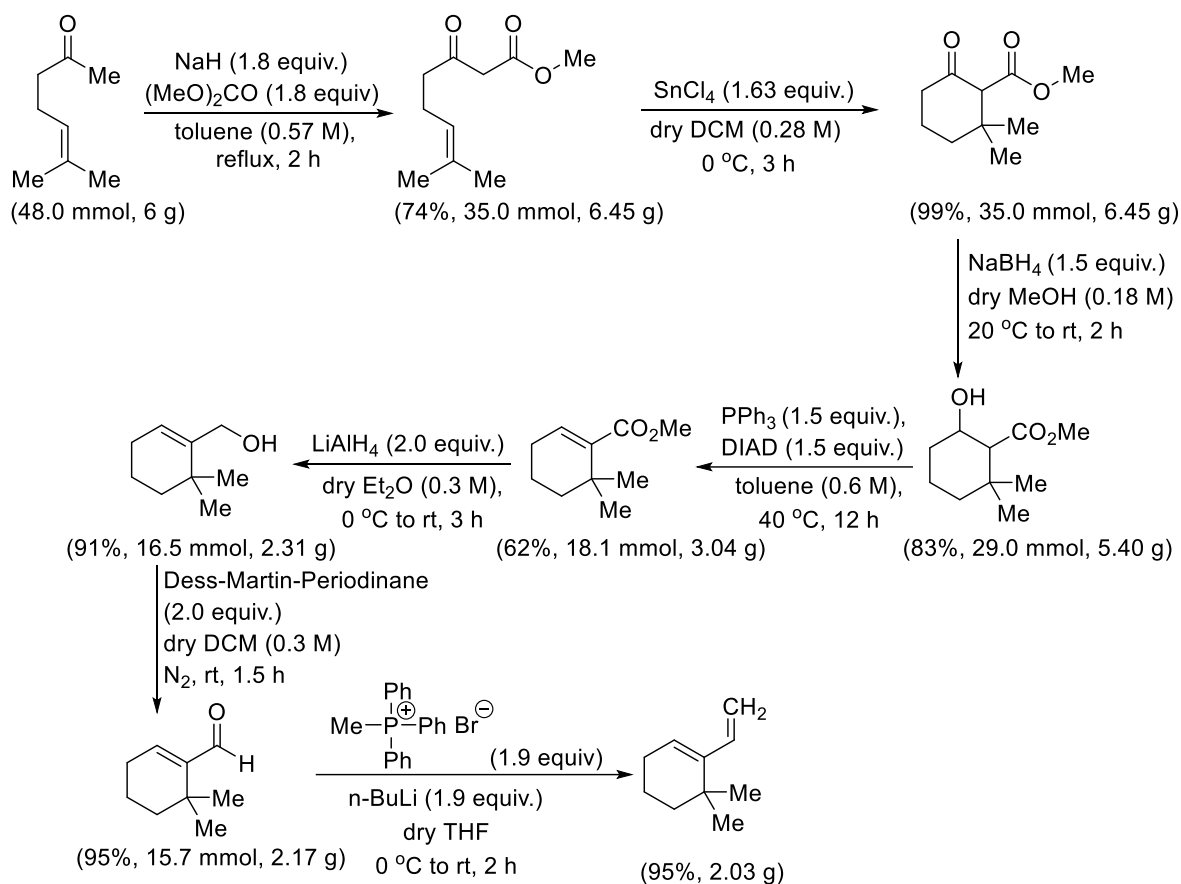

**Scheme S1.** Synthesis of 6,6-dimethyl-1-vinylcyclohex-1-ene.<sup>1</sup>

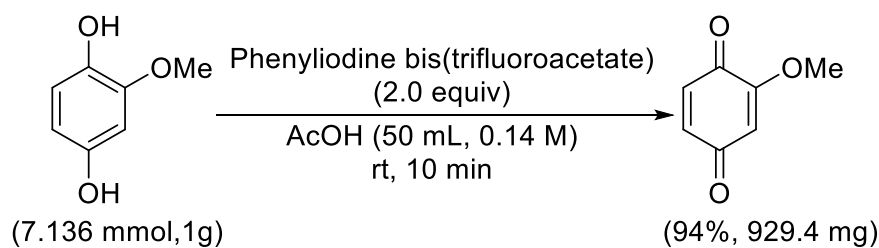

**Scheme S2.** Synthesis of 2-methoxycyclohexa-2,5-diene-1,4-dione.<sup>2</sup>

**Table-S4:** Optimization for the reductive C-alkylation of 3-hydroxy-8,8-dimethyl-5,6,7,8-tetrahydrophenanthrene-1,4-dione **7** with acetone <sup>a</sup>

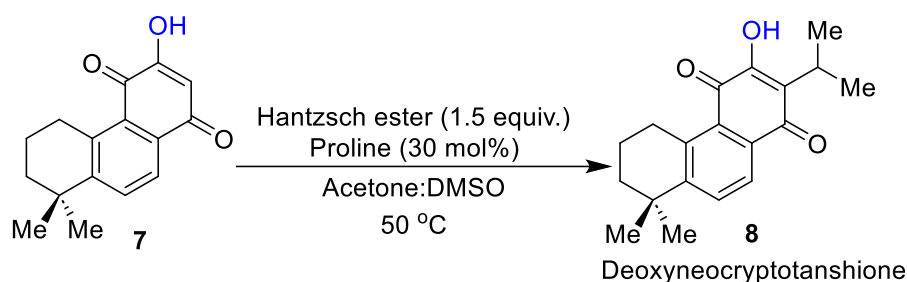

| Entry            | Solvent | <i>t</i> (h) | Yield (%) <sup>b</sup> |
|------------------|---------|--------------|------------------------|
| 1 <sup>c</sup>   | 2:3     | 24           | 27                     |
| 2 <sup>d</sup>   | 2:3     | 24           | 17                     |
| 3                | 2:3     | 48           | 30                     |
| 4 <sup>e</sup>   | 1:2     | 48           | 35                     |
| 5 <sup>e,f</sup> | 1:2     | 48           | 45                     |

<sup>a</sup> Reactions were carried out in solvent (0.3 M) with 1.5 equiv. of Hantzsch ester (added portion-wise) with relative to **7** (0.2 mmol) in presence of 30 mol% of proline as catalyst at 50 °C. <sup>b</sup> Yield refers to the column purified product of **8**. <sup>c</sup> 1.1 equiv. of Hantzsch ester was taken with relative to **7** (0.1 mmol). <sup>d</sup> 3.0 equiv. of Hantzsch ester was taken. <sup>e</sup> Acetone : DMSO (1:2) in 0.26 M was taken. <sup>f</sup> 1.0 equiv. of proline was taken.

**Discussion for Table S4:** In the beginning, key intermediate **7** was treated with 30 mol% of proline, 1.1 equiv. of Hantzsch ester and a solvent combination of acetone and DMSO in 2:3 ratio (0.3 M) resulting in the desired natural product deoxyneocryptotanshinone **8** with 27% yield in 24 h through reductive alkylation reaction (Table S4, entry 1). On performing the reductive C-alkylation reaction using 3.0 equiv. of Hantzsch ester, yield dropped to 17% in 24 h (Table S4, entry 2). Increasing the reaction time up to 48 h did not contribute to any betterment of the reductive alkylation with acetone (Table S4, entry 3). On taking acetone and DMSO in 1:2 ratio (0.26 M), reductive alkylation product **8** was obtained in 35% yield in 48 h (Table S4, entry 4). On increasing the catalyst loading up to 1.0 equiv., the natural product **8** was obtained with 45% in 48 h (Table S4, entry 5).

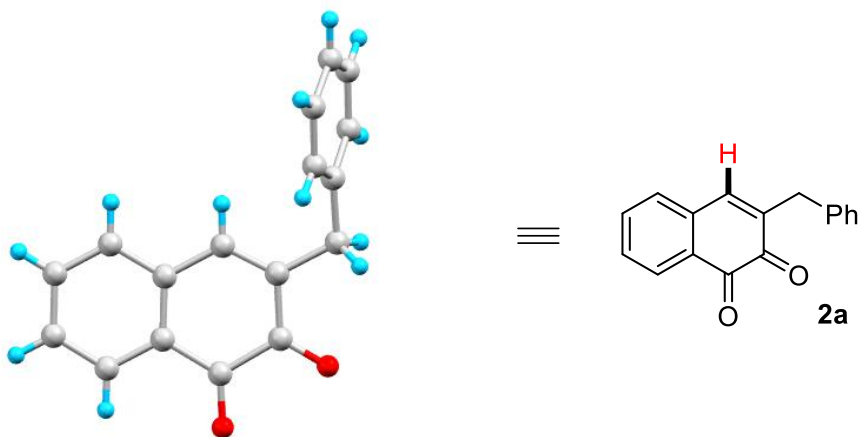

**Figure S1:** Crystal structure of 3-benzyl-naphthalene-1,2-dione (**2a**).

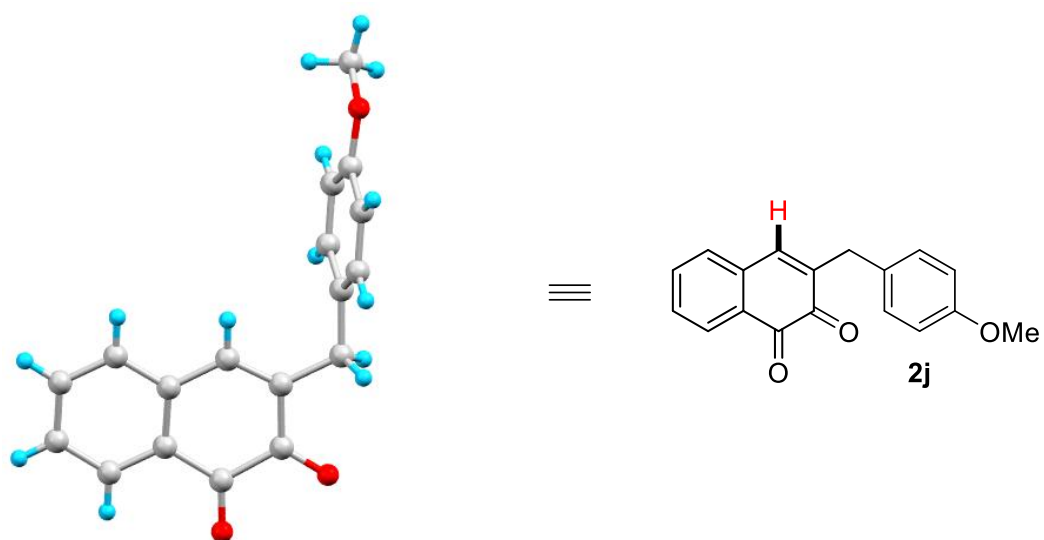

**Figure S2:** Crystal structure of 3-(4-methoxybenzyl)-naphthalene-1,2-dione (**2j**).

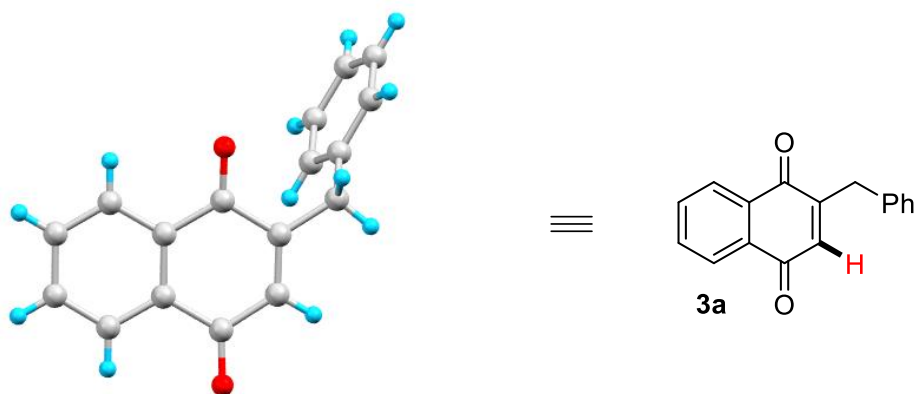

**Figure S3:** Crystal structure of 2-benzyl-naphthalene-1,4-dione (**3a**).



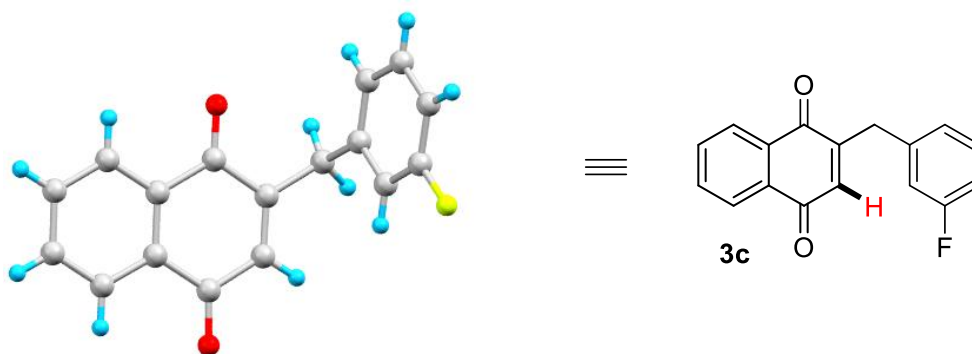

**Figure S4:** Crystal structure of 2-(3-fluorobenzyl)-naphthalene-1,4-dione (**3c**).

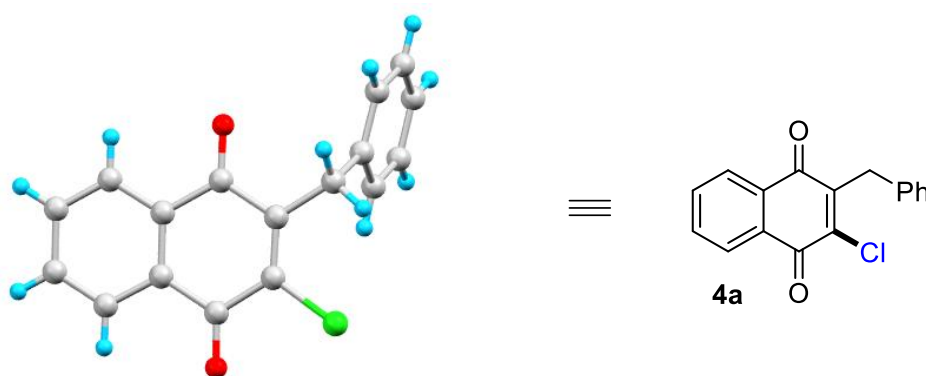

**Figure S5:** Crystal structure of 2-benzyl-3-chloronaphthalene-1,4-dione (**4a**).

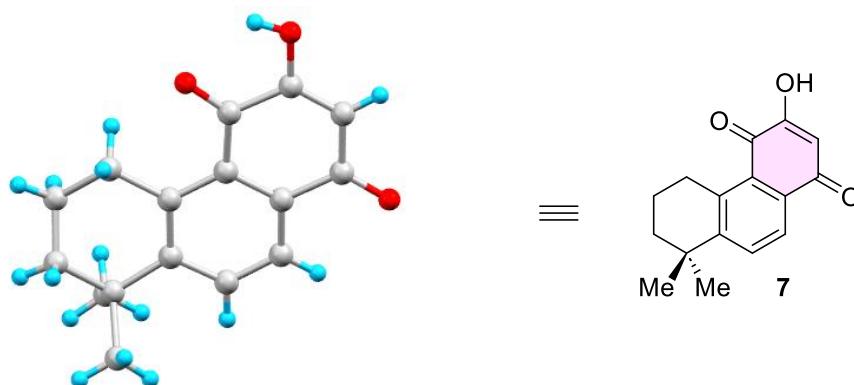

**Figure S6:** Crystal structure of 3-hydroxy-8,8-dimethyl-5,6,7,8-tetrahydrophenanthrene-1,4-dione (**7**).

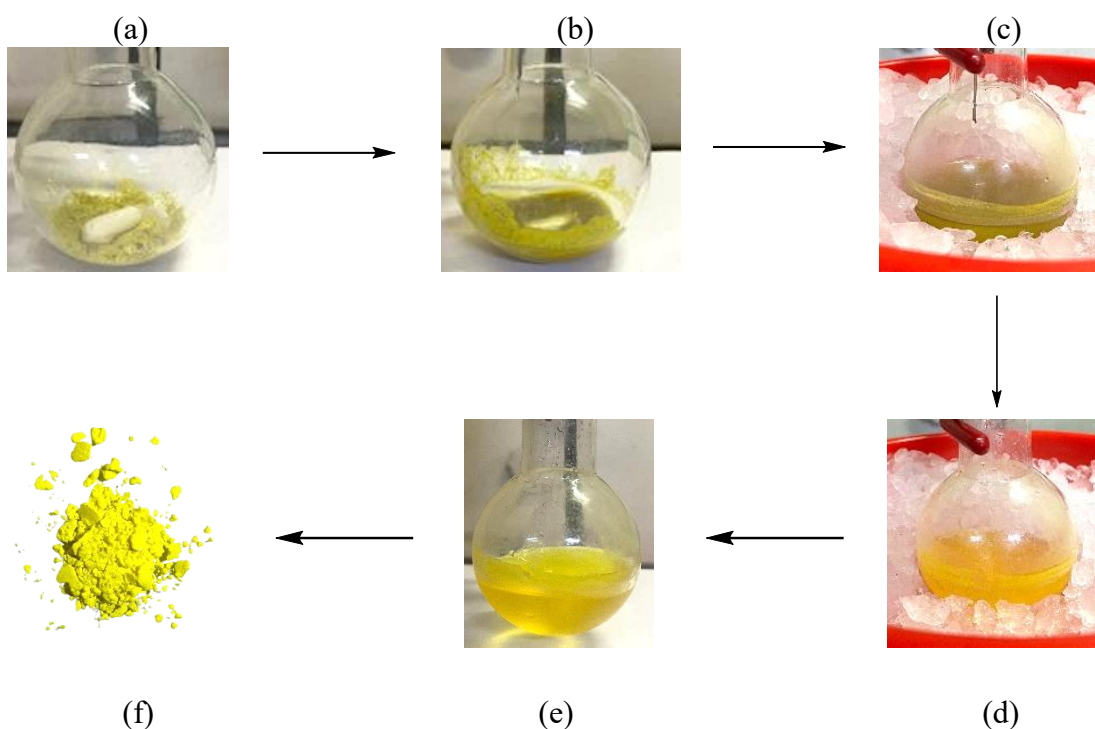

(a) 3.8 mmol of 2-benzyl-3-hydroxynaphthalene-1,4-dione **1a** was taken in a round bottom flask equipped with a magnetic stirring bar. (b) Then, 25 mL of dry DCM was added and N<sub>2</sub> atmosphere was maintained. (c) The reaction temperature was brought to 0 °C and 2.8 mL of oxalyl chloride was added drop-wise. (d) Then, 0.4 mL of dry DMF was added drop wise to the reaction mixture and stirred at 0 °C for 5 minutes. (e) The ice bath was removed and the reaction mixture was stirred for 10 h at rt. (f) Pure 2-benzyl-3-chloronaphthalene-1,4-dione **4a** was obtained with 91% yield after flash column chromatography.

**Figure S7:** Pictorial representation for the gram-scale synthesis of 2-benzyl-3-chloronaphthalene-1,4-dione (**4a**).

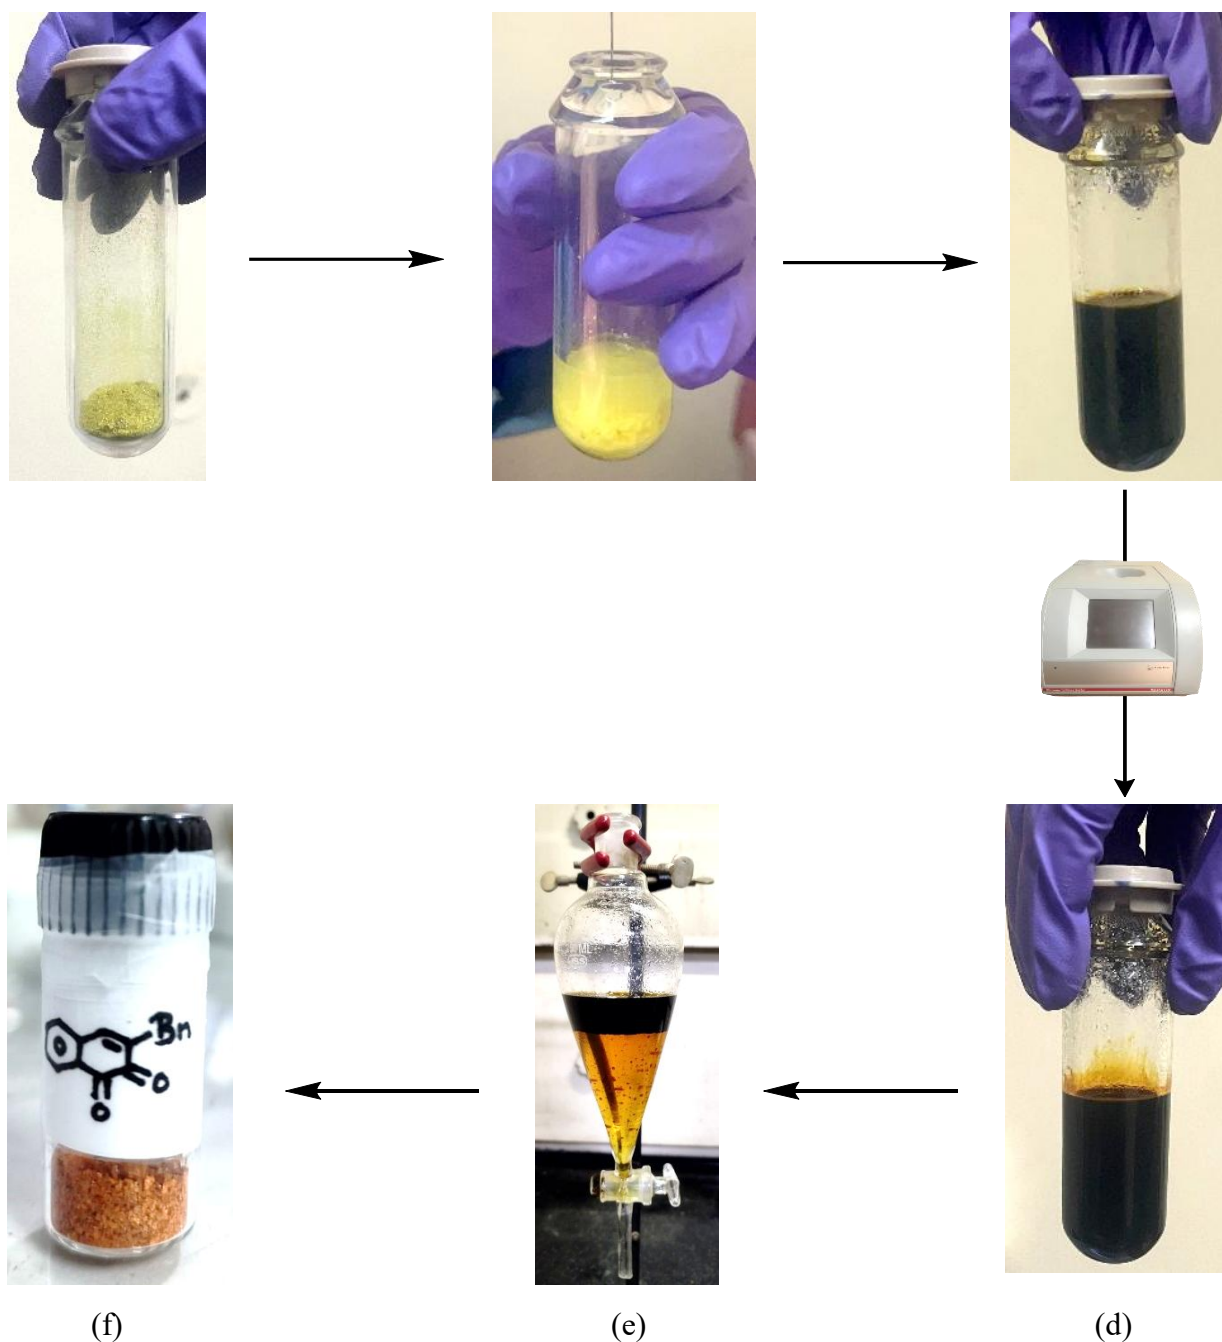

(a) 3.8 mmol of 2-benzyl-3-hydroxynaphthalene-1,4-dione **1a** was taken in a microwave reaction tube equipped with a magnetic stirring bar. (b) 9.5 mL of AcOH was added to it. (c) Then, hydroiodic acid (57 wt.% in H<sub>2</sub>O, 6.0 mL, 7.0 equiv.) was added to the reaction mixture and allowed to stirred at 90 °C in the Monowave 200 microwave reactor. (d) After 1 h the reaction mixture was taken out of the microwave reactor. (e) The reaction mixture was diluted with water and organic phase was separated using EtOAc (3 x 25 mL) and concentrated using rotary evaporator. (f) Pure 3-benzyl-naphthalene-1,2-dione **2a** was obtained with 90% yield after column purification.

**Figure S8:** Pictorial representation of gram-scale synthesis of 3-benzyl-naphthalene-1,2-dione **2a**.

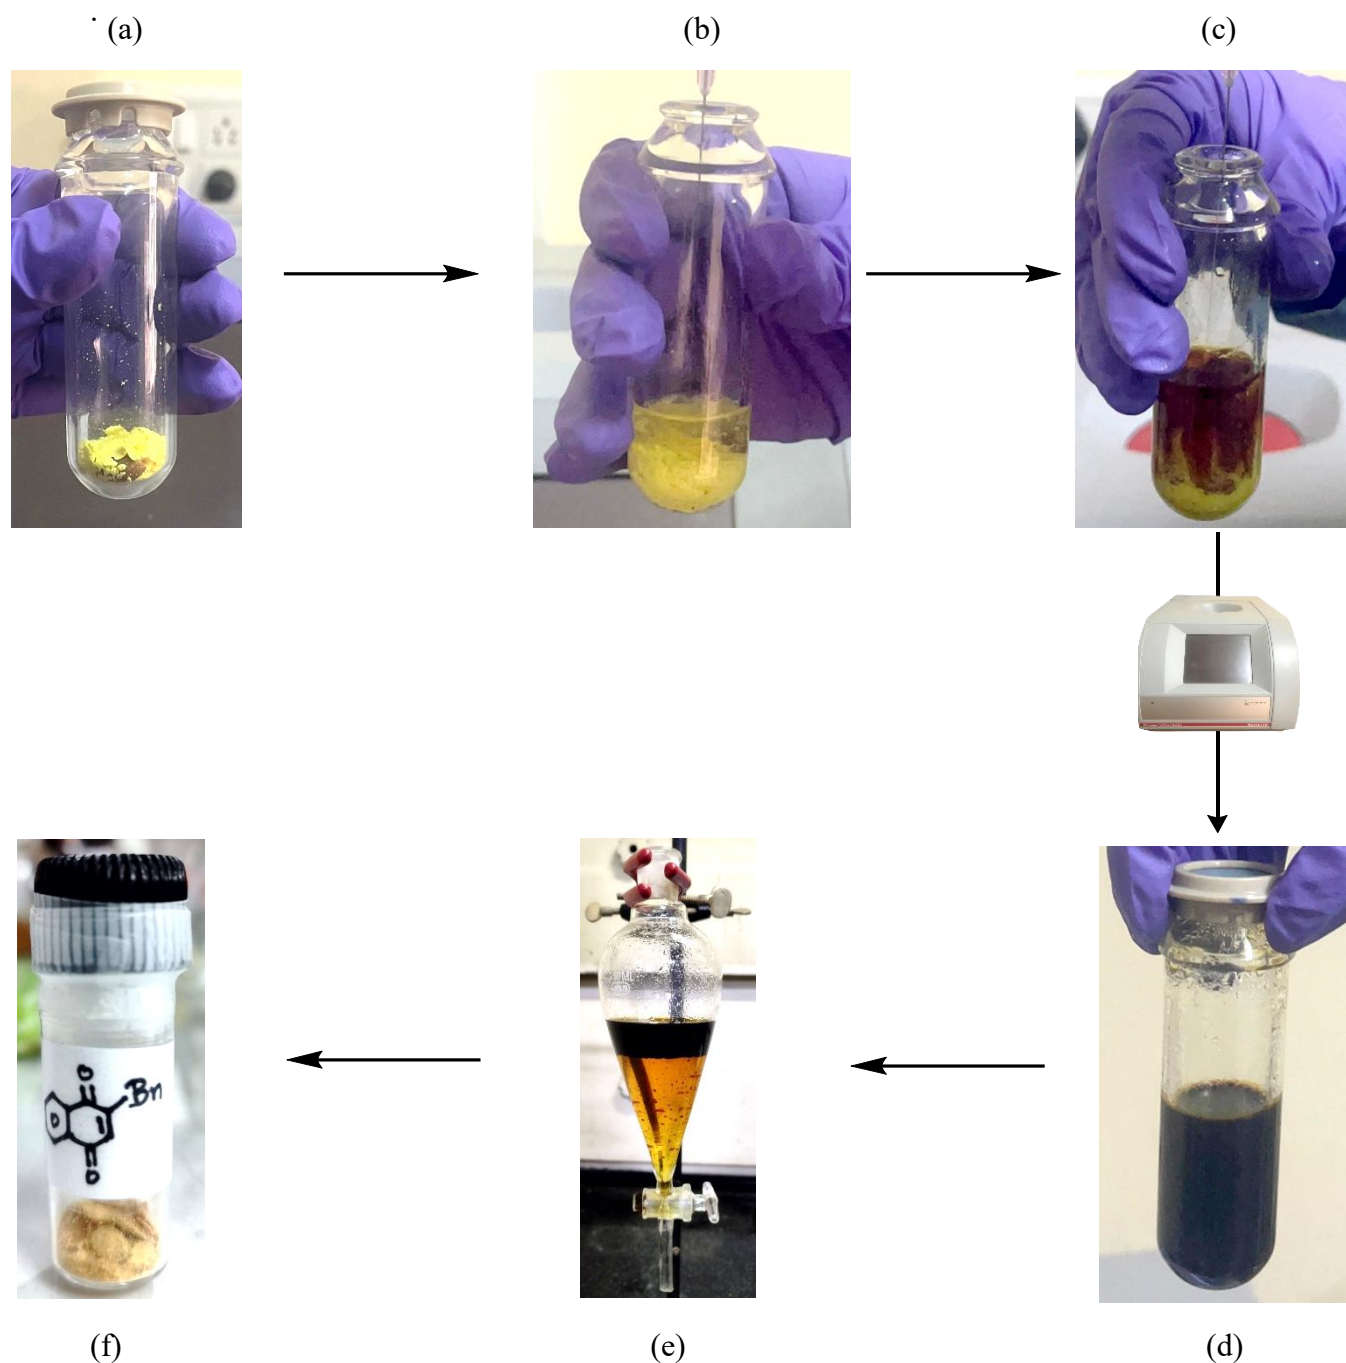

(a) 3.54 mmol of 2-benzyl-3-chloronaphthalene-1,4-dione **4a** was taken in a microwave reaction tube equipped with a magnetic stirring bar. (b) 9.0 mL of AcOH was added to it. (c) Then, hydroiodic acid (57 wt.% in H<sub>2</sub>O, 4.0 mL, 5.0 equiv.) was added to the reaction mixture and allowed to stirred at 90 °C in mono-wave 200 microwave reactor. (d) After 1 h the reaction mixture was taken out of the microwave reactor. (e) The reaction mixture was diluted with water and organic phase was separated using EtOAc (3 x 25 mL) and concentrated using rota evaporator. (f) Pure 2-benzyl-1,4-naphthoquinone **3a** was obtained with 95% yield after column purification.

**Figure S9:** Pictorial representation for the gram-scale synthesis of 2-benzyl-1,4-naphthoquinone **3a**.

## General Experimental Procedures

**Procedure A: General Procedure for Hydrodehydroxylation:** In an oven dried microwave reaction vial equipped with a magnetic stirring bar was taken 3-alkyllawsone (0.2 mmol, 1.0 equiv.), to which acetic acid (0.5 mL, 0.4 M) followed by hydroiodic acid (57 wt.% in H<sub>2</sub>O, 0.31 mL, 1.4 mmol, 7.0 equiv.) was added and allowed to stirred at 90 °C in Monowave 200 microwave reactor. The completion of the reaction was monitored by thin layer chromatography. The reaction mixture was diluted with water and organic layer was extracted with ethyl acetate (3 x 10 mL). The combined organic layer was dried over Na<sub>2</sub>SO<sub>4</sub> and concentrated. Pure 1,2-naphthoquinones were obtained by column chromatography (silica gel, hexane/ethyl acetate).

**Procedure B: General Procedure for Hydrodechlorination:** In an oven dried microwave reaction vial equipped with a magnetic stirring bar was taken 2-alkyl-3-chloronaphthalene-1,4-dione (0.2 mmol, 1.0 equiv.), to which acetic acid (0.5 mL, 0.4 M) followed by hydroiodic acid (57 wt.% in H<sub>2</sub>O, 0.22 mL, 1.0 mmol, 5.0 equiv.) was added and allowed to stirred at 90 °C in Monowave 200 microwave reactor. The completion of the reaction was monitored by thin layer chromatography. The reaction mixture was diluted with water and organic layer was extracted with ethyl acetate (3 x 10 mL). The combined organic layer was dried over Na<sub>2</sub>SO<sub>4</sub> and concentrated. Pure 1,4-naphthoquinones were obtained by column chromatography (silica gel, hexane/ethyl acetate).

**Procedure C: General Procedure for Synthesis of 2-Alkyl-3-chloronaphthalene-1,4-diones:** In an oven dried round bottom flask equipped with a magnetic stirring bar was taken 3-alkyllawsone (0.3 mmol, 1.0 equiv.) to which dry DCM (2 mL, 0.15 M) was added under nitrogen atmosphere. Then, oxalyl chloride (103 µL, 1.2 mmol, 4.0 equiv.) and dry DMF (30 µL, 0.39 mmol, 1.3 equiv.) was added respectively and the reaction mixture was allowed to stirred at room temperature for 10 h followed by flash column chromatography (silica gel, mixture of hexane/ethyl acetate) to obtain the pure 2-alkyl-3-chloronaphthalene-1,4-dione.

**Procedure D: General Procedure for Proline Catalyzed Three Component Reductive Alkylation (TCRA) Reaction:** In an oven dried round bottom flask equipped with a magnetic stirring bar, 2-hydroxy-1,4-naphthoquinone (52.2 mg, 0.3 mmol, 1.0 equiv.) was taken, to which proline (6.9 mg, 0.06 mmol, 20 mol%), Hantzsch ester (83.6 mg, 0.33 mmol, 1.1 equiv.) and DCM (1.0 mL, 0.3 M) was added and stirred for 10 seconds. Then, aldehyde (0.6 mmol, 2.0 equiv.) was added and allowed to stirred for 12-24 h at 35 °C. After completion of reaction,

the reaction mixture was concentrated under reduced pressure and purified by column chromatography (silica gel, mixture of hexanes/ethyl acetate) to afford pure 3-alkyl-2-hydroxy-1,4-naphthoquinone.

**Procedure E: General Procedure for the Synthesis of Phthiocol 1s:** In an oven dried round bottom flask equipped with a magnetic stirring bar at 0 °C was taken 2-ethyl-3-hydroxy-1,4-naphthoquinone (500 mg, 2.47 mmol, 1.0 equiv.), to which ice-cold KMnO<sub>4</sub> (4.69 mmol, 1.9 equiv. in 86 mL of H<sub>2</sub>O) and 173 mL of ice-cold NaOH solution (2% NaOH in H<sub>2</sub>O) was added and stirred vigorously for 20 seconds and stood still at 0 °C for 2 h followed by at 25 °C for 20 h. After 20 h, the reaction mixture was filtered in order to remove the precipitated MnO<sub>2</sub>. The filtrate was acidified with 20% HCl and then extracted with ethyl acetate thrice (3 x 25 mL). The combined organic layers were dried over Na<sub>2</sub>SO<sub>4</sub> and concentrated. Pure phthiocol **1s** was obtained by column chromatography (silica gel, hexane/ethyl acetate).

**Procedure F: General Procedure for the Synthesis of 2-Hydroxy-3-isopropyl-naphthalene-1,4-dione (1x):** In an oven dried round bottom flask equipped with a magnetic stirring bar was taken 2-hydroxy-1,4-naphthoquinone (52.2 mg, 0.3 mmol, 1.0 equiv.). To this proline (10.4 mg, 0.09 mmol, 30 mol%), Hantzsch ester (114.0 mg, 0.45 mmol, 1.5 equiv.) in two portion and solvent combination of acetone + DMSO in 1:2 (1.0 mL, 0.3 M) was added and stirred for 24 h at 50 °C. After completion of reaction, the reaction mixture was diluted with water and organic layer was extracted with ethyl acetate thrice (3 x 10 mL). The combined organic layers were dried over sodium sulphate and concentrated. Pure product (**1x**) was afforded via column chromatography (silica gel, mixture of hexanes/ethyl acetate).

**Procedure G: Modified procedure for the synthesis of 3-Hydroxy-8,8-dimethyl-5,6,7,8-tetrahydrophenanthrene-1,4-dione 7:<sup>1,2</sup>**

**Step-1: [4+2]-cycloaddition reaction:** In an oven dried round bottom flask equipped with a magnetic stirring bar was taken hot ethanol (6 mL). To it, 2-methoxycyclohexa-2,5-diene-1,4-dione (349.4 mg, 2.53 mmol, 1.0 equiv.) was added and stirred for 10 seconds. In another round bottom flask, the solution of 6,6-dimethyl-1-vinylcyclohex-1-ene (690 mg, 5.06 mmol, 2.0 equiv.) in ethanol (3 mL) was taken and drop-wise added to the solution of dienophile. The reaction was stirred for 12 h at room temperature.

**Step-2: Aromatization through air-oxidation followed by deprotection of OMe:** After completion of cycloaddition reaction, the solvent was evaporated to remove any excess diene from the reaction media. Then, ethanol (2.5 mL, 1.0 M) was added to the reaction mixture and

KOH pellets (1.41 g, 25.2 mmol, 14.0 equiv.) was added. Air was bubbled into the reaction mixture and stirred for 24 h at room temperature. Then, reaction mixture was acidified with HCl (1.0 N) and organic layer was extracted with ethyl acetate thrice (3 x 25 mL). The combined organic layers were dried over Na<sub>2</sub>SO<sub>4</sub> and concentrated. Pure product **7** was obtained by column chromatography (silica gel, hexane/ethyl acetate).

**Procedure H: General Procedure for the synthesis of Deoxyneocryptotanshione 8:** In an oven dried round bottom flask equipped with a magnetic stirring bar was taken compound **7** (51.3 mg, 0.2 mmol, 0.2 equiv.). To this proline (23 mg, 0.2 mmol, 1.0 equiv.), Hantzsch ester (76 mg, 0.3 mmol, 1.5 equiv.) in two portion and solvent combination of acetone + DMSO in 1:2 (0.26 mL, 0.77 M) was added and stirred for 48 h at 50 °C. After completion of reaction, the reaction mixture was diluted with water and organic layer was extracted with ethyl acetate thrice (3 x 5 mL). The combined organic layers were dried over sodium sulphate and concentrated. Pure natural product **8** was afford via column chromatography (silica gel, mixture of hexanes/ethyl acetate).

**Procedure I: General Procedure for the synthesis of Miltirone 9:** In an oven dried round bottom flask vial equipped with a magnetic stirring bar was taken compound **8** (60 mg, 0.2 mmol, 1.0 equiv.), to which acetic acid (0.9 mL, 0.22 M) followed by hydroiodic acid (57 wt.% in H<sub>2</sub>O, 0.31 mL, 1.4 mmol, 7.0 equiv.) was added and allowed to stirred at 90 °C in an oil bath. After reaction completion, the reaction mixture was diluted with water and organic layer was extracted with ethyl acetate (3 x 10 mL). The combined organic layer was dried over Na<sub>2</sub>SO<sub>4</sub> and concentrated. Pure natural product **9** was obtained by column chromatography (silica gel, hexane/ethyl acetate).

**Procedure J: General Procedure for the synthesis of analogue of Deoxyneocryptotanshinone 11:** In an oven dried round bottom flask equipped with a magnetic stirring bar was taken compound **7** (50.0 mg, 0.2 mmol, 0.2 equiv.). To this proline (4.5 mg, 0.04 mmol, 20 mol%), Hantzsch ester (53.2 mg, 0.21 mmol, 1.1 equiv.) and DCM (0.66 mL, 0.3 M) was added and stirred for 10 seconds. Then, acetaldehyde (56 µL, 1.0 mmol, 5.0 equiv.) was added and stirred for 15 h at room temperature. After completion of reaction, the reaction mixture was concentrated under reduced pressure and pure product **11** was afford via column chromatography (silica gel, mixture of hexanes/ethyl acetate).

**Procedure K: General Procedure for the synthesis of analogue of Miltirone 12:** In an oven dried round bottom flask vial equipped with a magnetic stirring bar was taken compound **11**

(31 mg, 0.11 mmol, 1.0 equiv.), to which acetic acid (0.5 mL, 0.22 M) followed by hydroiodic acid (57 wt.% in H<sub>2</sub>O, 0.17 mL, 0.77 mmol, 7.0 equiv.) was added and allowed to stirred at 90 °C in an oil bath. After reaction completion, the reaction mixture was diluted with water and organic layer was extracted with ethyl acetate (3 x 5 mL). The combined organic layer was dried over Na<sub>2</sub>SO<sub>4</sub> and concentrated. Pure product **12** was obtained by column chromatography (silica gel, hexane/ethyl acetate).

**Procedure L: Modified procedure for the synthesis of (6,6-dimethylcyclohex-1-en-1-yl)-methanol:** **Step-1:** In an oven dried round bottom flask methyl 6,6-dimethylcyclohex-1-ene-1-carboxylate (3.0 g, 18.0 mmol, 1.0 equiv.) was taken and dry ether (27 mL) was added to it in nitrogen atmosphere and stirred for 10 seconds.

**Step-2:** In a separate oven dried round bottom flask LiAlH<sub>4</sub> (1.37 g, 36 mmol, 2.0 equiv.) was taken and to it dry ether (27 mL) was added at 0 °C under nitrogen atmosphere. Then, the previously prepared ester solution (in step-1) was added to it drop-wise at 0 °C. The reaction mixture was stirred for 3 h at 0 °C to rt. After the completion of reaction, half saturated solution of ammonium chloride was added to the reaction mixture and stirred for 5 minutes. The organic layer was extracted using diethyl ether thrice (3 x 80 mL). The organic layers were washed with water followed by washing with brine. The combined organic layers were dried over Na<sub>2</sub>SO<sub>4</sub> and concentrated under reduced pressure. The crude product (6,6-dimethylcyclohex-1-en-1-yl)-methanol (2.31 g, 91%) was obtained as a viscous colourless oil and was pure enough to use directly in the next step without further purification.

**Procedure M: Modified procedure for the synthesis of 6,6-dimethylcyclohex-1-ene-1-carbaldehyde:** In an oven dried round bottom flask was taken (6,6-dimethylcyclohex-1-en-1-yl)-methanol (2.31 g, 16.5 mmol, 1.0 equiv.) and dry DCM (50 mL, 0.3 M) was added to the reaction mixture under nitrogen atmosphere. The reaction mixture was brought to 0 °C and Dess-Martin-Periodinane (14 g, 33 mmol, 2.0 equiv.) was added to it slowly. Then, reaction was stirred for 1.5 h at room temperature. The slightly volatile product 6,6-dimethylcyclohex-1-ene-1-carbaldehyde (2.17 g, 95%) was obtained by flash column chromatography (silica gel, hexane/ethyl acetate) and was immediately used in the next step.



**3-Benzyl-naphthalene-1,2-dione (2a):** Prepared by following the procedure A and purified by

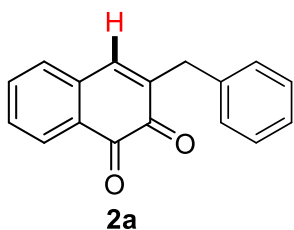

column chromatography using EtOAc/hexane (0.4:9.6 to 0.8:9.2) and

isolated as orange solid. Yield: 99% (49 mg). MP: 149-151 °C. IR

(Neat):  $\nu_{\max}$  2917, 1657, 1584, 1451, 1380, 1256, 938, 753 and 699

$\text{cm}^{-1}$ ;  $^1\text{H}$  NMR ( $\text{CDCl}_3$ , 500 MHz):  $\delta$  8.03 (1H, d,  $J = 8.0$  Hz), 7.56

(1H, dt,  $J = 7.5, 1.5$  Hz), 7.41 (1H, dt,  $J = 7.5, 1.0$  Hz), 7.35-7.32 (2H,

m), 7.27-7.24 (3H, m), 7.19 (1H, d,  $J = 7.0$  Hz), 6.98 (1H, br s, olefinic-H), 3.77 (2H, s);

$^{13}\text{C}\{^1\text{H}\}$  NMR ( $\text{CDCl}_3$ , DEPT-135, 125 MHz):  $\delta$  180.8 (C, C=O), 179.1 (C, C=O), 141.6 (CH),

140.0 (C), 137.7 (C), 135.8 (CH), 135.2 (C), 130.6 (C), 130.0 (CH), 129.9 (CH), 129.4 (CH),

129.3 (2 x CH), 128.7 (2 x CH), 126.7 (CH), 35.1 ( $\text{CH}_2$ ); HRMS (ESI-TOF)  $m/z$ :  $[\text{M} + \text{H}]^+$

Calcd for  $\text{C}_{17}\text{H}_{13}\text{O}_2$  249.0916; Found 249.0920.

**3-(2-Fluorobenzyl)naphthalene-1,2-dione (2b):** Prepared by following the procedure A and

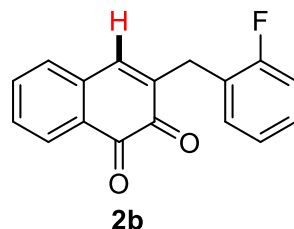

purified by column chromatography using EtOAc/hexane (0.2:9.8 to

0.5:9.5) and isolated as orange solid. Yield: 99% (52.7 mg). MP: 156-

158 °C. IR (Neat):  $\nu_{\max}$  2960, 1657, 1584, 1450, 1257, 1096, 937 and

754  $\text{cm}^{-1}$ ;  $^1\text{H}$  NMR ( $\text{CDCl}_3$ , 500 MHz):  $\delta$  8.03 (1H, d,  $J = 7.5$  Hz),

7.57 (1H, dt,  $J = 7.5, 1.0$  Hz), 7.42 (1H, t,  $J = 7.5$  Hz), 7.32 (1H, td,

$J = 7.2, 1.5$  Hz), 7.28-7.23 (1H, m), 7.22 (1H, d,  $J = 7.5$  Hz), 7.11 (1H, dt,  $J = 7.5, 1.0$  Hz),

7.07 (1H, t,  $J = 9.5$  Hz), 7.03 (1H, s, olefinic-H), 3.80 (2H, s);  $^{13}\text{C}\{^1\text{H}\}$  NMR ( $\text{CDCl}_3$ , DEPT-

135, 100 MHz):  $\delta$  180.6 (C, C=O), 179.0 (C, C=O), 161.2 (C, d,  $J = 245$  Hz, C-F), 141.7 (CH),

138.2 (C), 135.8 (CH), 135.1 (C), 131.8 (CH, d,  $J = 4.0$  Hz), 130.6 (C), 130.0 (CH), 129.9

(CH), 129.6 (CH), 128.7 (CH, d,  $J = 8.0$  Hz), 124.6 (C, d,  $J = 15.0$  Hz), 124.3 (CH, d,  $J = 3.0$

Hz), 115.5 (CH, d,  $J = 21.0$  Hz), 28.6 ( $\text{CH}_2$ , d,  $J = 3.0$  Hz);  $^{19}\text{F}$  NMR ( $\text{CDCl}_3$ , 375 MHz):  $\delta$  -

117.3; HRMS (ESI-TOF)  $m/z$ :  $[\text{M} + \text{H}]^+$  Calcd for  $\text{C}_{17}\text{H}_{12}\text{FO}_2$  267.0821; Found 267.0818.

**3-(3-Fluorobenzyl)naphthalene-1,2-dione (2c):** Prepared by following the procedure A and

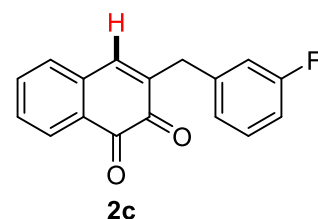

purified by column chromatography using EtOAc/hexane (0.2:9.8

to 0.5:9.5) and isolated as orange solid. Yield: 99% (52.7 mg). MP:

139-141 °C. IR (Neat):  $\nu_{\max}$  2915, 1659, 1584, 1450, 1381, 1257,

1097, 938 and 753  $\text{cm}^{-1}$ ;  $^1\text{H}$  NMR ( $\text{CDCl}_3$ , 500 MHz):  $\delta$  8.03 (1H,

d,  $J = 7.0$  Hz), 7.59 (1H, t,  $J = 8.0$  Hz), 7.43 (1H, t,  $J = 7.5$  Hz), 7.29 (1H, q,  $J = 6.5$  Hz), 7.24

(1H, d,  $J = 7.5$  Hz), 7.05 (2H, d,  $J = 9.5$  Hz), 6.96 (2H, br q), 3.76 (2H, s);  $^{13}\text{C}\{^1\text{H}\}$  NMR

( $\text{CDCl}_3$ , DEPT-135, 100 MHz):  $\delta$  180.6 (C, C=O), 178.9 (C, C=O), 162.9 (C, d,  $J = 245$  Hz,

C-F), 141.9 (CH), 140.2 (C, d,  $J = 7.0$  Hz), 139.1 (C), 135.9 (CH), 134.9 (C), 130.6 (C), 130.15 (CH, d,  $J = 8.3$  Hz), 130.1 (CH), 130.0 (CH), 129.5 (CH), 124.9 (CH, d,  $J = 3.0$  Hz), 116.1 (CH, d,  $J = 21$  Hz), 113.7 (CH, d,  $J = 21$  Hz), 34.9 (CH<sub>2</sub>, d,  $J = 1.0$  Hz); <sup>19</sup>F NMR (CDCl<sub>3</sub>, 470 MHz):  $\delta$  -112.9; HRMS (ESI-TOF)  $m/z$ : [M + Na]<sup>+</sup> Calcd for C<sub>17</sub>H<sub>11</sub>FO<sub>2</sub>Na 289.0641; Found 289.0642.

**3-(4-Fluorobenzyl)naphthalene-1,2-dione (2d)**: Prepared by following the procedure A and

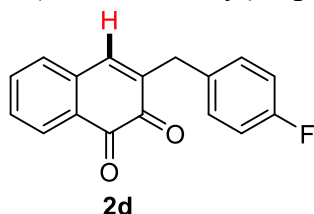

purified by column chromatography using EtOAc/hexane (0.4:9.6 to 0.8:9.2) and isolated as orange solid. Yield: 94% (50 mg). MP: 140-141 °C. IR (Neat):  $\nu_{\max}$  2922, 1657, 1504, 1216, 1153, 1094, 933 and 761 cm<sup>-1</sup>; <sup>1</sup>H NMR (CDCl<sub>3</sub>, 500 MHz):  $\delta$  8.03 (1H, d,  $J =$

7.5 Hz), 7.60 (1H, dt,  $J = 7.5, 1.0$  Hz), 7.42 (1H, dt,  $J = 7.5, 1.0$  Hz), 7.23 (3H, m), 7.01 (3H, m), 3.74 (2H, s); <sup>13</sup>C{<sup>1</sup>H} NMR (CDCl<sub>3</sub>, DEPT-135, 100 MHz):  $\delta$  180.7 (C, C=O), 179.0 (C, C=O), 161.7 (C, d,  $J = 243$  Hz, C-F), 141.7 (CH), 139.7 (C), 135.9 (CH), 135.0 (C), 133.3 (C, d,  $J = 3.0$  Hz), 130.8 (CH), 130.7 (CH), 130.6 (C), 130.0 (2 x CH, d,  $J = 8$  Hz), 129.5 (CH), 115.5 (2 x CH, d,  $J = 21$  Hz), 34.5 (CH<sub>2</sub>); <sup>19</sup>F NMR (CDCl<sub>3</sub>, 375 MHz):  $\delta$  -116.1; HRMS (ESI-TOF)  $m/z$ : [M + H]<sup>+</sup> Calcd for C<sub>17</sub>H<sub>12</sub>FO<sub>2</sub> 267.0821; Found 267.0819.

**3-(4-Chlorobenzyl)naphthalene-1,2-dione (2e)**: Prepared by following the procedure A and

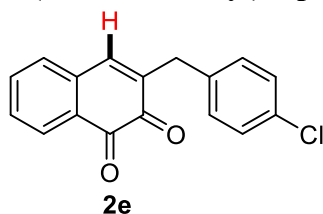

purified by column chromatography using EtOAc/hexane (0.2:9.8 to 0.5:9.5) and isolated as orange solid. Yield: 93% (52.5 mg). MP: 142-144 °C. IR (Neat):  $\nu_{\max}$  2922, 1656, 1584, 1452, 1383, 1255, 1089, 934, 804, and 763 cm<sup>-1</sup>; <sup>1</sup>H NMR (CDCl<sub>3</sub>, 500 MHz):  $\delta$  8.04

(1H, d,  $J = 7.0$  Hz), 7.59 (1H, t,  $J = 7.5$  Hz), 7.43 (1H, t,  $J = 7.5$  Hz), 7.30 (2H, d,  $J = 7.5$  Hz), 7.23-7.19 (3H, m), 6.99 (1H, s, olefinic-H), 3.73 (2H, s); <sup>13</sup>C{<sup>1</sup>H} NMR (CDCl<sub>3</sub>, DEPT-135, 100 MHz):  $\delta$  180.7 (C, C=O), 179.0 (C, C=O), 141.8 (CH), 139.4 (C), 136.2 (C), 135.9 (CH), 135.0 (C), 132.6 (C), 130.6 (2 x CH, C), 130.2 (CH), 130.1 (CH), 129.5 (CH), 128.8 (2 x CH), 34.6 (CH<sub>2</sub>); HRMS (ESI-TOF)  $m/z$ : [M + NH<sub>4</sub>]<sup>+</sup> Calcd for C<sub>17</sub>H<sub>15</sub>NCIO<sub>2</sub> 300.0791; Found 300.0792.

**3-(4-Bromobenzyl)naphthalene-1,2-dione (2f)**: Prepared by following the procedure A and

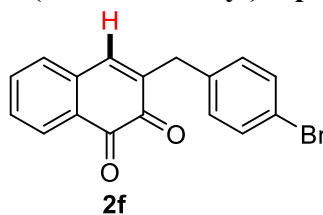

purified by column chromatography using EtOAc/hexane (0.2:9.8 to 0.5:9.5) and isolated as orange solid. Yield: 93% (61 mg). MP: 144-146 °C. IR (Neat):  $\nu_{\max}$  3036, 1656, 1584, 1452, 1383, 1255, 1089, 934, and 763 cm<sup>-1</sup>; <sup>1</sup>H NMR (CDCl<sub>3</sub>, 500 MHz):  $\delta$  8.04 (1H,

d,  $J = 7.5$  Hz), 7.59 (1H, dt,  $J = 7.5, 1.0$  Hz), 7.43 (1H, dt,  $J = 7.5, 1.0$  Hz), 7.30 (2H, td,  $J = 8.5, 2.5$  Hz), 7.23-7.19 (3H, m), 6.99 (1H, s, olefinic-*H*), 3.73 (2H, s);  $^{13}\text{C}\{^1\text{H}\}$  NMR ( $\text{CDCl}_3$ , DEPT-135, 100 MHz):  $\delta$  180.6 (C, C=O), 178.9 (C, C=O), 141.8 (CH), 139.3 (C), 136.1 (C), 135.9 (CH), 134.9 (C), 132.6 (C), 130.5 (2 x CH, C), 130.1 (CH), 130.0 (CH), 129.5 (CH), 128.8 (2 x CH), 34.6 ( $\text{CH}_2$ ); HRMS (ESI-TOF)  $m/z$ :  $[\text{M} + \text{H}]^+$  Calcd for  $\text{C}_{17}\text{H}_{12}\text{BrO}_2$  327.0021; Found 327.0020.

**2-Chloro-3-(4-iodobenzyl)naphthalene-1,4-dione (2g):** Prepared by following the procedure

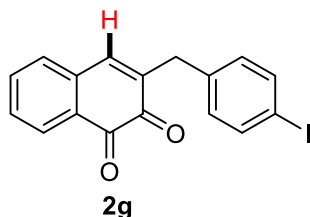

**A** and purified by column chromatography using EtOAc/hexane (0.4:9.6 to 0.8:9.2) and isolated as orange solid. Yield: 95% (71 mg).

MP: 159-161 °C. IR (Neat):  $\nu_{\text{max}}$  1664, 1480, 1305, 1256, 1003, 938 and 766  $\text{cm}^{-1}$ ;  $^1\text{H}$  NMR ( $\text{CDCl}_3$ , 500 MHz):  $\delta$  8.03 (1H, d,  $J = 7.5$

Hz), 7.64 (2H, d,  $J = 8.5$  Hz), 7.58 (1H, dt,  $J = 8.5, 1.5$  Hz), 7.42 (1H, dt,  $J = 7.5, 1.0$  Hz), 7.22 (1H, d,  $J = 7.5$  Hz), 7.02 (1H, s, olefinic-*H*), 7.00 (2H, d,  $J = 6.0$  Hz), 3.70 (2H,  $\text{CH}_2$ );  $^{13}\text{C}\{^1\text{H}\}$  NMR ( $\text{CDCl}_3$ , DEPT-135, 100 MHz):  $\delta$  180.6 (C, C=O), 178.9 (C, C=O), 141.8 (CH), 139.2 (C), 137.8 (2 x CH), 137.4 (C), 135.9 (CH), 134.9 (C), 131.3 (2 x CH), 130.6 (C), 130.1 (CH), 130.0 (CH), 129.5 (CH), 92.1 (C), 34.8 ( $\text{CH}_2$ ); HRMS (ESI-TOF)  $m/z$ :  $[\text{M} + \text{NH}_4]^+$  Calcd for  $\text{C}_{17}\text{H}_{15}\text{NIO}_2$  392.0147; Found 392.0147.

**3-(3-Methylbenzyl)naphthalene-1,2-dione (2h):** Prepared by following the procedure

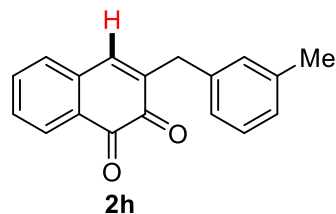

**A** and purified by column chromatography using EtOAc/hexane (0.4:9.6 to 0.8:9.2) and isolated as orange solid. Yield: 95% (50 mg). MP:

142-144 °C. IR (Neat):  $\nu_{\text{max}}$  2919, 1658, 1583, 1377, 1257, 940 and 752  $\text{cm}^{-1}$ ;  $^1\text{H}$  NMR ( $\text{CDCl}_3$ , 500 MHz):  $\delta$  8.01 (1H, d,  $J = 7.0$

Hz), 7.56 (1H, t,  $J = 7.5$  Hz), 7.40 (1H, t,  $J = 7.5$  Hz), 7.21 (2H, m), 7.06 (3H, m), 6.99 (1H, br s, olefinic-*H*), 3.72 (2H, s), 2.34 (3H, s, Ar- $\text{CH}_3$ );  $^{13}\text{C}\{^1\text{H}\}$  NMR ( $\text{CDCl}_3$ , DEPT-135, 125 MHz):  $\delta$  180.8 (C, C=O), 179.1 (C, C=O), 141.6 (CH), 140.0 (C), 138.3 (C), 137.6 (CH), 135.7 (C), 135.2 (C), 130.6 (C), 130.0 (CH), 129.9 (2 x CH), 129.4 (CH), 128.6 (CH), 127.4 (CH), 126.3 (CH), 35.0 ( $\text{CH}_2$ ), 21.3 ( $\text{CH}_3$ ); HRMS (ESI-TOF)  $m/z$ :  $[\text{M} + \text{H}]^+$  Calcd for  $\text{C}_{18}\text{H}_{15}\text{O}_2$  263.1072; Found 263.1070.

**3-(4-Methylbenzyl)naphthalene-1,2-dione (2i):** Prepared by following the procedure A and

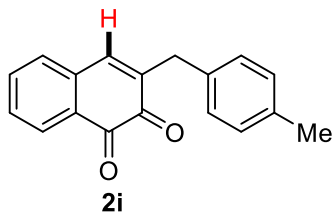

and purified by column chromatography using EtOAc/hexane (0.4:9.6

to 0.8:9.2) and isolated as orange solid. Yield: 95% (50 mg). MP:

139-141 °C. IR (Neat):  $\nu_{\max}$  2918, 1654, 1583, 1514, 1375, 1252,

942 and 767  $\text{cm}^{-1}$ ;  $^1\text{H}$  NMR ( $\text{CDCl}_3$ , 500 MHz):  $\delta$  8.02 (1H, d,  $J$  =

7.5 Hz), 7.56 (1H, dt,  $J$  = 7.5, 1.5 Hz), 7.40 (1H, dt,  $J$  = 7.5, 1.0 Hz), 7.19 (1H, d,  $J$  = 7.5 Hz),

7.14 (4H, s), 6.97 (1H, br s, olefinic- $H$ ), 3.72 (2H, br s), 2.34 (3H, s, Ar- $\text{CH}_3$ );  $^{13}\text{C}\{^1\text{H}\}$  NMR

( $\text{CDCl}_3$ , DEPT-135, 125 MHz):  $\delta$  180.8 (C, C=O), 179.2 (C, C=O), 141.5 (CH), 140.2 (C),

136.3 (C), 135.7 (CH), 135.2 (C), 134.5 (C), 130.5 (C), 129.9 (2 x CH), 129.4 (3 x CH), 129.2

(2 x CH), 34.7 ( $\text{CH}_2$ ), 21.0 ( $\text{CH}_3$ ); HRMS (ESI-TOF)  $m/z$ :  $[\text{M} + \text{H}]^+$  Calcd for  $\text{C}_{18}\text{H}_{15}\text{O}_2$

263.1072; Found 263.1062.

**3-(4-Methoxybenzyl)naphthalene-1,2-dione (2j):** Prepared by following the procedure A and

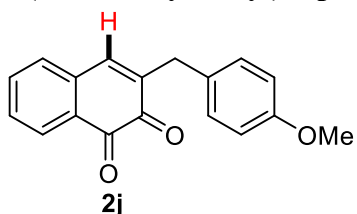

and purified by column chromatography using EtOAc/hexane

(0.8:9.2 to 1.1:8.9) and isolated as orange solid. Yield: 70% (39

mg). MP: 154-156 °C. IR (Neat):  $\nu_{\max}$  2904, 1658, 1510, 1451,

1300, 1244, 1030, 938, 814 and 760  $\text{cm}^{-1}$ ;  $^1\text{H}$  NMR ( $\text{CDCl}_3$ , 500

MHz):  $\delta$  8.03 (1H, d,  $J$  = 7.5 Hz), 7.56 (1H, t,  $J$  = 7.5 Hz), 7.41 (1H, t,  $J$  = 7.5 Hz), 7.18 (3H,

t,  $J$  = 9.5 Hz), 6.96 (1H, s, olefinic- $H$ ), 6.87 (2H, d,  $J$  = 8.5 Hz), 3.81 (3H, s,  $\text{OCH}_3$ ), 3.71 (2H,

s);  $^{13}\text{C}\{^1\text{H}\}$  NMR ( $\text{CDCl}_3$ , DEPT-135, 125 MHz):  $\delta$  180.9 (C, C=O), 179.3 (C, C=O), 158.5

(C), 141.4 (CH), 140.4 (C), 135.8 (CH), 135.3 (C), 130.6 (C), 130.4 (2 x CH), 130.0 (CH),

129.9 (CH), 129.7 (C), 129.4 (CH), 114.2 (2 x CH), 55.3 ( $\text{CH}_3$ ,  $\text{OCH}_3$ ), 34.3 ( $\text{CH}_2$ ); HRMS

(ESI-TOF)  $m/z$ :  $[\text{M} + \text{NH}_4]^+$  Calcd for  $\text{C}_{18}\text{H}_{18}\text{NO}_3$  296.1287; Found 296.1283.

**3-(4-Hydroxybenzyl)naphthalene-1,2-dione (2j'):** Prepared by following the procedure A

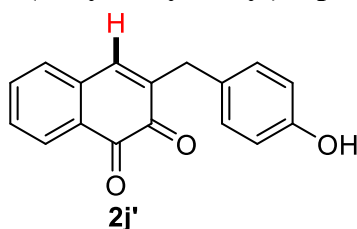

and purified by column chromatography using EtOAc/hexane

(2.6:7.4 to 3.6:6.4) and isolated as wine-red solid. Yield: 20%

(10.5 mg). MP: 170-172 °C. IR (Neat):  $\nu_{\max}$  3372, 2926, 1661,

1510, 1245, 1176, 1031, 760  $\text{cm}^{-1}$ ;  $^1\text{H}$  NMR (DMSO- $d_6$ , 500

MHz):  $\delta$  9.25 (1H, s, OH), 7.88 (1H, d,  $J$  = 8.0 Hz), 7.67 (1H, dt,  $J$  = 7.0, 1.0 Hz), 7.49 (1H, d,

$J$  = 7.5 Hz), 7.45 (1H, d,  $J$  = 8.0 Hz), 7.26 (1H, s, olefinic- $H$ ), 7.06 (2H, d,  $J$  = 8.5 Hz), 6.69

(2H, d,  $J$  = 8.5 Hz), 3.55 (2H, s);  $^{13}\text{C}\{^1\text{H}\}$  NMR (DMSO- $d_6$ , DEPT-135, 100 MHz):  $\delta$  180.2

(C, C=O), 178.6 (C, C=O), 155.8 (C), 140.7 (CH), 139.6 (C), 135.6 (CH), 135.1 (C), 130.8

(C), 129.9 (2 x CH), 129.7 (CH), 129.6 (CH), 128.7 (CH), 128.5 (C), 115.2 (2 x CH), 33.8 (CH<sub>2</sub>); HRMS (ESI-TOF)  $m/z$ : [M + Na]<sup>+</sup> Calcd for C<sub>17</sub>H<sub>12</sub>NaO<sub>3</sub> 287.0684; Found 287.0689.

**3-(4-Nitrobenzyl)naphthalene-1,2-dione (2k):** Prepared by following the procedure A and

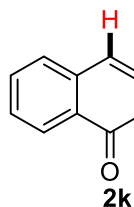

purified by column chromatography using EtOAc/hexane (0.8:9.2 to 1.1:8.9) and isolated as orange solid. Yield: 90% (53 mg). MP: 149-151 °C. IR (Neat):  $\nu_{\max}$  2922, 1736, 1661, 1516, 1455, 1343, 1257, 1107 and 760 cm<sup>-1</sup>; <sup>1</sup>H NMR (CDCl<sub>3</sub>, 500

MHz):  $\delta$  8.17 (2H, d,  $J$  = 8.5 Hz), 8.05 (1H, d,  $J$  = 8.0 Hz), 7.62 (1H, dt,  $J$  = 7.5, 1.0 Hz), 7.48-7.44 (3H, m), 7.27 (1H, d,  $J$  = 8.0 Hz), 7.12 (1H, s, olefinic- $H$ ), 3.87 (2H, s); <sup>13</sup>C{<sup>1</sup>H} NMR (CDCl<sub>3</sub>, DEPT-135, 125 MHz):  $\delta$  180.5 (C, C=O), 178.7 (C, C=O), 147.0 (C), 145.6 (C), 142.5 (CH), 138.1 (C), 136.0 (CH), 134.7 (C), 130.8 (C), 130.5 (CH), 130.2 (CH), 130.0 (2 x CH), 129.7 (CH), 124.0 (2 x CH), 35.4 (CH<sub>2</sub>); HRMS (ESI-TOF)  $m/z$ : [M + NH<sub>4</sub>]<sup>+</sup> Calcd for C<sub>17</sub>H<sub>15</sub>N<sub>2</sub>O<sub>4</sub> 311.1032; Found 311.1031.

**4-((3,4-Dioxo-3,4-dihydronaphthalen-2-yl)methyl)benzonitrile (2l):** Prepared by following

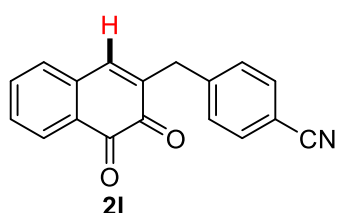

the procedure A and purified by column chromatography using EtOAc/hexane (0.8:9.2 to 1.1:8.9) and isolated as pale yellow solid. Yield: 93% (51 mg). MP: 151-152 °C. IR (Neat):  $\nu_{\max}$  2924, 2226, 1662, 1589, 1381, 1257, 907 and 729 cm<sup>-1</sup>; <sup>1</sup>H NMR (CDCl<sub>3</sub>, 500 MHz):  $\delta$  8.06 (1H, d,  $J$  = 7.5 Hz), 7.63-7.60 (3H, m),

7.47 (1H, dt,  $J$  = 7.5, 1.0 Hz), 7.40 (2H, d,  $J$  = 8.5 Hz), 7.27 (1H, t,  $J$  = 4.0 Hz), 7.09 (1H, s, olefinic- $H$ ), 3.83 (2H, s); <sup>13</sup>C{<sup>1</sup>H} NMR (CDCl<sub>3</sub>, DEPT-135, 125 MHz):  $\delta$  180.5 (C, C=O), 178.7 (C, C=O), 143.5 (C), 142.4 (CH), 138.3 (C), 136.0 (CH), 134.8 (C), 132.5 (2 x CH), 130.8 (C), 130.5 (CH), 130.2 (2 x CH), 130.0 (CH), 129.6 (CH), 118.7 (C), 110.8 (C), 35.6 (CH<sub>2</sub>); HRMS (ESI-TOF)  $m/z$ : [M + H]<sup>+</sup> Calcd for C<sub>18</sub>H<sub>12</sub>NO<sub>2</sub> 274.0868; Found 274.0866.

**3-(2-(Trifluoromethyl)benzyl)naphthalene-1,2-dione (2m):** Prepared by following the

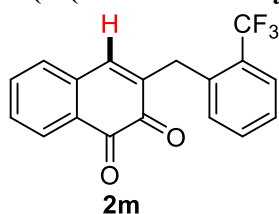

procedure A and purified by column chromatography using EtOAc/hexane (0.8:9.2 to 1.1:8.9) and isolated as orange solid. Yield: 95% (60 mg). MP: 148-150 °C. IR (Neat):  $\nu_{\max}$  1696, 1588, 1453, 1309, 1110, 1036 and 762 cm<sup>-1</sup>; <sup>1</sup>H NMR (CDCl<sub>3</sub>, 500 MHz):  $\delta$  8.03 (1H, d,

$J$  = 8.0 Hz), 7.71 (1H, d,  $J$  = 7.5 Hz), 7.57-7.51 (2H, m), 7.41 (2H, q,  $J$  = 7.5 Hz), 7.35 (1H, d,  $J$  = 7.5 Hz), 7.14 (1H, d,  $J$  = 7.5 Hz), 6.72 (1H, s, olefinic- $H$ ), 3.97 (2H, s); <sup>13</sup>C{<sup>1</sup>H} NMR (CDCl<sub>3</sub>, DEPT-135, 125 MHz):  $\delta$  180.5 (C, C=O), 179.0 (C, C=O), 142.1 (CH), 139.1 (C),

136.0 (C), 135.9 (CH), 134.9 (C), 132.3 (CH), 132.1 (CH), 130.5 (C), 130.1 (CH), 130.0 (CH), 129.6 (CH), 129.2 (C, q,  $J = 30$  Hz), 127.1 (CH), 126.3 (CH, q,  $J = 5.0$  Hz), 124.3 (C, q,  $J = 272.5$  Hz,  $\text{CF}_3$ ), 31.6 ( $\text{CH}_2$ );  $^{19}\text{F}$  NMR ( $\text{CDCl}_3$ , 375 MHz):  $\delta$  -62.4; HRMS (ESI-TOF)  $m/z$ :  $[\text{M} + \text{NH}_4]^+$  Calcd for  $\text{C}_{18}\text{H}_{15}\text{F}_3\text{NO}_2$  334.1055; Found 334.1053.

**3-(3-(Trifluoromethyl)benzyl)naphthalene-1,2-dione (2n):** Prepared by following the

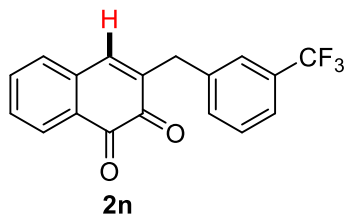

procedure **A** and purified by column chromatography using EtOAc/hexane (0.8:9.2 to 1.1:8.9) and isolated as orange solid. Yield: 99% (62.6 mg). MP: 154-156 °C. IR (Neat):  $\nu_{\text{max}}$  2930, 1652, 1589, 1448, 1325, 1258, 1110, 953, 832 and 760

$\text{cm}^{-1}$ ;  $^1\text{H}$  NMR ( $\text{CDCl}_3$ , 500 MHz):  $\delta$  8.04 (1H, d,  $J = 7.5$  Hz), 7.60 (1H, t,  $J = 7.5$  Hz), 7.52 (2H, d,  $J = 9.5$  Hz), 7.46 (3H, m), 7.25 (1H, d,  $J = 9.0$  Hz), 7.06 (1H, s, olefinic- $H$ ), 3.82 (2H, s);  $^{13}\text{C}\{^1\text{H}\}$  NMR ( $\text{CDCl}_3$ , DEPT-135, 100 MHz):  $\delta$  180.6 (C,  $\text{C}=\text{O}$ ), 178.8 (C,  $\text{C}=\text{O}$ ), 142.1 (CH), 138.9 (C), 138.8 (C), 135.9 (CH), 134.9 (C), 132.7 (CH), 131.0 (C, q,  $J = 32.0$  Hz), 130.7 (C), 130.3 (CH), 130.1 (CH), 129.6 (CH), 129.2 (CH), 125.8 (CH, q,  $J = 4.0$  Hz), 124.0 (C, q,  $J = 270.0$  Hz,  $\text{CF}_3$ ), 123.7 (CH, q,  $J = 4.0$  Hz), 35.2 ( $\text{CH}_2$ );  $^{19}\text{F}$  NMR ( $\text{CDCl}_3$ , 375 MHz):  $\delta$  -62.5; HRMS (ESI-TOF)  $m/z$ :  $[\text{M} + \text{NH}_4]^+$  Calcd for  $\text{C}_{18}\text{H}_{15}\text{F}_3\text{NO}_2$  334.1055; Found 334.1057.

**3-(4-(Trifluoromethyl)benzyl)naphthalene-1,2-dione (2o):** Prepared by following the

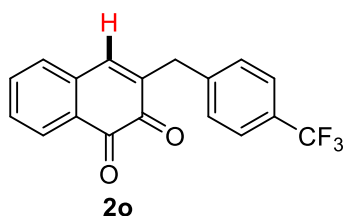

procedure **A** and purified by column chromatography using EtOAc/hexane (0.8:9.2 to 1.1:8.9) and isolated as yellow solid. Yield: 95% (60 mg). MP: 140-142 °C. IR (Neat):  $\nu_{\text{max}}$  2923, 1666, 1586, 1417, 1319, 1256, 1102, 966 and 766  $\text{cm}^{-1}$ ;  $^1\text{H}$  NMR ( $\text{CDCl}_3$ , 500 MHz):  $\delta$  8.05 (1H, d,  $J = 8.0$  Hz), 7.61-7.57 (3H, m),

7.44 (1H, t,  $J = 7.5$  Hz), 7.40 (2H, d,  $J = 8.0$  Hz), 7.25 (1H, d,  $J = 7.5$  Hz), 7.05 (1H, s, olefinic- $H$ ), 3.83 (2H, s);  $^{13}\text{C}\{^1\text{H}\}$  NMR ( $\text{CDCl}_3$ , DEPT-135, 100 MHz):  $\delta$  180.6 (C,  $\text{C}=\text{O}$ ), 178.8 (C,  $\text{C}=\text{O}$ ), 142.1 (CH), 142.0 (C), 138.9 (C), 135.9 (CH), 134.9 (C), 130.7 (C), 130.3 (CH), 130.1 (CH), 129.6 (3 x CH), 129.1 (C, q,  $J = 33$  Hz), 125.6 (2 x CH, q,  $J = 4.0$  Hz), 124.1 (C, q,  $J = 271$  Hz,  $\text{CF}_3$ ), 35.2 ( $\text{CH}_2$ );  $^{19}\text{F}$  NMR ( $\text{CDCl}_3$ , 375 MHz):  $\delta$  -62.5; HRMS (ESI-TOF)  $m/z$ :  $[\text{M} + \text{NH}_4]^+$  Calcd for  $\text{C}_{18}\text{H}_{15}\text{F}_3\text{NO}_2$  334.1055; Found 334.1058.

**3-(Naphthalen-1-ylmethyl)naphthalene-1,2-dione (2p):** Prepared by following the

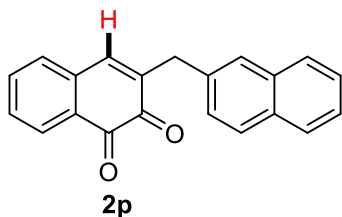

procedure **A** and purified by column chromatography using

EtOAc/hexane (0.4:9.6 to 0.8:9.2) and isolated as yellow solid.

Yield: 95% (56.7 mg). MP: 139-141 °C. IR (Neat):  $\nu_{\max}$  3014,

2923, 1658, 1591, 1364, 1256, 940 and 748  $\text{cm}^{-1}$ ;  $^1\text{H}$  NMR

( $\text{CDCl}_3$ , 500 MHz):  $\delta$  8.03 (1H, d,  $J = 7.5$  Hz), 7.82 (3H, m), 7.72 (1H, s), 7.54 (1H, dt,  $J = 7.5, 1.0$  Hz), 7.50-7.45 (2H, m), 7.40 (1H, t,  $J = 8.0$  Hz), 7.36 (1H, d,  $J = 8.5$  Hz), 7.14 (1H, d,  $J = 7.5$  Hz), 6.98 (1H, br s, olefinic-*H*), 3.93 (2H, s);  $^{13}\text{C}\{^1\text{H}\}$  NMR ( $\text{CDCl}_3$ , DEPT-135, 125 MHz):  $\delta$  180.8 (C, C=O), 179.1 (C, C=O), 141.8 (CH), 139.9 (C), 135.8 (CH), 135.1 (2 x C), 133.6 (C), 132.3 (C), 130.6 (C), 130.0 (CH), 129.9 (CH), 129.4 (CH), 128.4 (CH), 127.9 (CH), 127.6 (CH), 127.5 (2 x CH), 126.2 (CH), 125.7 (CH), 35.2 ( $\text{CH}_2$ ); HRMS (ESI-TOF)  $m/z$ : [ $\text{M} + \text{H}$ ] $^+$  Calcd for  $\text{C}_{21}\text{H}_{15}\text{O}_2$  299.1072; Found 299.1073.

**3-(Thiophen-2-ylmethyl)naphthalene-1,2-dione (2q):** Prepared by following the procedure **A**

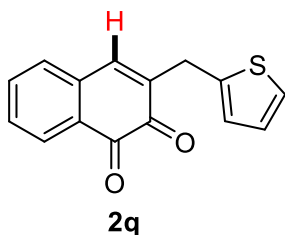

and purified by column chromatography using EtOAc/hexane (0.4:9.6

to 0.8:9.2) and isolated as orange solid. Yield: 92% (47 mg); MP: 108-

110 °C. IR (Neat):  $\nu_{\max}$  2920, 2850, 1709, 1459, 1258, 1011 and 789

$\text{cm}^{-1}$ ;  $^1\text{H}$  NMR ( $\text{CDCl}_3$ , 500 MHz):  $\delta$  8.05 (1H, d,  $J = 8.0$  Hz), 7.59

(1H, dt,  $J = 7.5, 1.0$  Hz), 7.44 (1H, br t,  $J = 7.5$  Hz), 7.25 (1H, d,  $J = 7.5$  Hz), 7.21 (1H, d,  $J = 5.0$  Hz), 7.12 (1H, s, olefinic-*H*), 6.98 (1H, dd,  $J = 5, 5$  Hz), 6.93 (1H, d,  $J = 2.5$  Hz), 3.98 (2H, s);  $^{13}\text{C}\{^1\text{H}\}$  NMR ( $\text{CDCl}_3$ , DEPT-135, 100 MHz):  $\delta$  180.4 (C, C=O), 179.0 (C, C=O), 141.8 (CH), 139.5 (C), 139.0 (C), 135.9 (CH), 134.9 (C), 130.6 (C), 130.2 (CH), 130.0 (CH), 129.6 (CH), 127.2 (CH), 126.7 (CH), 124.6 (CH), 29.1 ( $\text{CH}_2$ ); HRMS (ESI-TOF)  $m/z$ : [ $\text{M} + \text{H}$ ] $^+$  Calcd for  $\text{C}_{15}\text{H}_{11}\text{O}_2\text{S}$  255.0480; Found 255.0482.

**3-Phenyl-naphthalene-1,2-dione (2r):** Prepared by following the procedure **A** and purified by

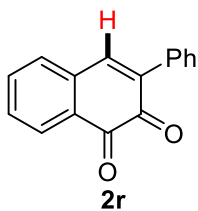

column chromatography using EtOAc/hexane (0.4:9.6 to 0.8:9.2) and

isolated as red solid. Yield: 94% (44 mg). MP: 110-112 °C. IR (Neat):  $\nu_{\max}$

1652, 1588, 1357, 1271 and 758  $\text{cm}^{-1}$ ;  $^1\text{H}$  NMR ( $\text{CDCl}_3$ , 400 MHz):  $\delta$  8.10

(1H, d,  $J = 7.6$  Hz), 7.66 (1H, d,  $J = 7.2$  Hz), 7.54-7.46 (4H, m), 7.45-7.37

(4H, m);  $^{13}\text{C}\{^1\text{H}\}$  NMR ( $\text{CDCl}_3$ , DEPT-135, 100 MHz):  $\delta$  180.3 (C, C=O), 179.2 (C, C=O), 141.5 (CH), 139.2 (C), 135.8 (CH), 135.6 (C), 134.4 (C), 131.2 (C), 130.3 (CH), 130.0 (2 x CH), 128.9 (CH), 128.6 (2 x CH), 128.4 (2 x CH); HRMS (ESI-TOF)  $m/z$ : [ $\text{M} + \text{H}$ ] $^+$  Calcd for  $\text{C}_{16}\text{H}_{11}\text{O}_2$  235.0759; Found 235.0760.



**3-Methylnaphthalene-1,2-dione (2s):** Prepared by following the procedure A and purified by

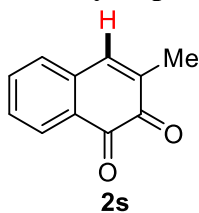

column chromatography using EtOAc/hexane (0.2:9.8 to 0.5:9.5) and isolated as orange solid. Yield: 99% (34 mg). MP: 149-151 °C. IR (Neat):

$\nu_{\max}$  2924, 1643, 1381, 1263, 1064, 942 and 761  $\text{cm}^{-1}$ ;  $^1\text{H}$  NMR ( $\text{CDCl}_3$ , 500

MHz):  $\delta$  8.02 (1H, td,  $J = 8.0, 1.0$  Hz), 7.59 (1H, dt,  $J = 7.5, 1.5$  Hz), 7.41

(1H, dt,  $J = 7.5, 1.0$  Hz), 7.25 (1H, d,  $J = 7.5$  Hz), 7.20 (1H, br s, olefinic-*H*), 2.05 (3H, s,  $\text{CH}_3$ );

$^{13}\text{C}\{^1\text{H}\}$  NMR ( $\text{CDCl}_3$ , DEPT-135, 125 MHz):  $\delta$  181.5 (C,  $\text{C}=\text{O}$ ), 179.1 (C,  $\text{C}=\text{O}$ ), 141.5 (CH),

136.5 (C), 135.8 (CH), 135.4 (C), 130.7 (C), 129.9 (CH), 129.7 (CH), 128.9 (CH), 15.7 ( $\text{CH}_3$ );

HRMS (ESI-TOF)  $m/z$ :  $[\text{M} + \text{Na}]^+$  Calcd for  $\text{C}_{11}\text{H}_8\text{O}_2\text{Na}$  195.0422; Found 195.0422.

**3-Ethynaphthalene-1,2-dione (2t):** Prepared by following the procedure A and purified by

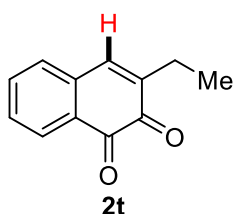

column chromatography using EtOAc/hexane (0.2:9.8 to 0.5:9.5) and isolated as orange solid. Yield: 99% (37 mg). MP: 150-152 °C. IR (Neat):

$\nu_{\max}$  2923, 1647, 1458, 1377, 1259, 1089 and 750  $\text{cm}^{-1}$ ;  $^1\text{H}$  NMR ( $\text{CDCl}_3$ ,

500 MHz):  $\delta$  7.99 (1H, d,  $J = 7.5$  Hz), 7.57 (1H, dt,  $J = 7.5, 0.5$  Hz), 7.38

(1H, t,  $J = 8.0$  Hz), 7.25 (1H, d,  $J = 7.5$  Hz), 7.13 (1H, s, olefinic-*H*), 2.44 (2H, q,  $J = 7.5$  Hz),

1.14 (3H, t,  $J = 7.5$  Hz);  $^{13}\text{C}\{^1\text{H}\}$  NMR ( $\text{CDCl}_3$ , DEPT-135, 125 MHz):  $\delta$  181.1 (C,  $\text{C}=\text{O}$ ),

179.4 (C,  $\text{C}=\text{O}$ ), 142.0 (C), 140.0 (CH), 135.8 (CH), 135.5 (C), 130.6 (C), 129.8 (CH), 129.7

(CH), 129.1 (CH), 22.4 ( $\text{CH}_2$ ), 12.3 ( $\text{CH}_3$ ); HRMS (ESI-TOF)  $m/z$ :  $[\text{M} + \text{H}]^+$  Calcd for

$\text{C}_{12}\text{H}_{11}\text{O}_2$  187.0759; Found 187.0754.

**3-Isobutylnaphthalene-1,2-dione (2u):** Prepared by following the procedure A and purified

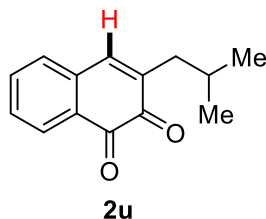

by column chromatography using EtOAc/hexane (0.4:9.6 to 0.8:9.2) and isolated as brown liquid. Yield: 94% (40 mg). IR (Neat):  $\nu_{\max}$  2922,

1739, 1665, 1461, 1264, 1158, 967 and 774  $\text{cm}^{-1}$ ;  $^1\text{H}$  NMR ( $\text{CDCl}_3$ , 500

MHz):  $\delta$  8.04 (1H, d,  $J = 7.5$  Hz), 7.61 (1H, dt,  $J = 7.5, 1.0$  Hz), 7.42

(1H, dt,  $J = 8.0, 1.0$  Hz), 7.28 (1H, d,  $J = 7.5$  Hz), 7.14 (1H, s, olefinic-*H*), 2.30 (2H, d,  $J = 7.0$

Hz), 1.89 (1H, septet,  $J = 7.0$  Hz), 0.94 (6H, d,  $J = 6.5$  Hz);  $^{13}\text{C}\{^1\text{H}\}$  NMR ( $\text{CDCl}_3$ , DEPT-135,

125 MHz):  $\delta$  181.4 (C,  $\text{C}=\text{O}$ ), 179.4 (C,  $\text{C}=\text{O}$ ), 141.8 (CH), 139.8 (C), 135.8 (CH), 135.4 (C),

130.8 (C), 130.0 (CH), 129.8 (CH), 129.1 (CH), 38.7 ( $\text{CH}_2$ ), 27.5 (CH), 22.5 (2 x  $\text{CH}_3$ ); HRMS

(ESI-TOF)  $m/z$ :  $[\text{M} + \text{H}]^+$  Calcd for  $\text{C}_{14}\text{H}_{15}\text{O}_2$  215.1072; Found 215.1070.



**3-Pentylnaphthalene-1,2-dione (2v):** Prepared by following the procedure A and purified by

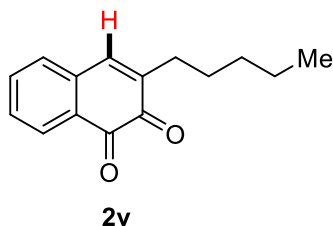

column chromatography using EtOAc/hexane (0.4:9.6 to 0.8:9.2) and isolated as orange solid. Yield: 92% (42 mg). MP: 151-153 °C. IR (Neat):  $\nu_{\max}$  2924, 1651, 1585, 1452, 1256, 939 and 763  $\text{cm}^{-1}$ ;  $^1\text{H}$  NMR ( $\text{CDCl}_3$ , 500 MHz):  $\delta$  8.02 (1H, td,  $J = 7.5$ , 1.0 Hz), 7.59 (1H, dt,  $J = 7.5$ , 1.0 Hz), 7.40 (1H, dt,  $J = 8.0$ , 1.0 Hz), 7.27 (1H, d,  $J = 7.5$  Hz), 7.15 (1H, br s, olefinic- $H$ ), 2.41 (2H, t,  $J = 7.5$ , 1.0 Hz), 1.56-1.50 (2H, m), 1.35-1.32 (4H, m), 0.89 (3H, br t,  $J = 7.5$  Hz);  $^{13}\text{C}\{^1\text{H}\}$  NMR ( $\text{CDCl}_3$ , DEPT-135, 125 MHz):  $\delta$  181.2 (C, C=O), 179.4 (C, C=O), 140.9 (C), 140.6 (CH), 135.8 (CH), 135.5 (C), 130.7 (C), 129.9 (CH), 129.6 (CH), 129.1 (CH), 31.5 ( $\text{CH}_2$ ), 29.3 ( $\text{CH}_2$ ), 27.9 ( $\text{CH}_2$ ), 22.4 ( $\text{CH}_2$ ), 13.9 ( $\text{CH}_3$ ); HRMS (ESI-TOF)  $m/z$ :  $[\text{M} + \text{Na}]^+$  Calcd for  $\text{C}_{15}\text{H}_{16}\text{O}_2\text{Na}$  251.1048; Found 251.1054.

**3-Isopentylnaphthalene-1,2-dione (2w):** Prepared by following the procedure A and purified by

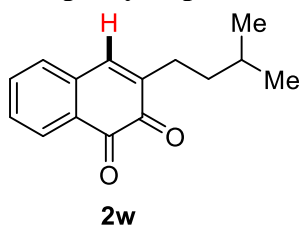

by column chromatography using EtOAc/hexane (0.4:9.6 to 0.8:9.2) and isolated as orange solid. Yield: 99% (45.6 mg). MP: 151-153 °C. IR (Neat):  $\nu_{\max}$  2921, 1650, 1586, 1451, 1263, 936 and 762  $\text{cm}^{-1}$ ;  $^1\text{H}$  NMR ( $\text{CDCl}_3$ , 500 MHz):  $\delta$  8.02 (1H, d,  $J = 8.0$  Hz), 7.59 (1H, dt,  $J = 7.5$ , 1.5 Hz), 7.40 (1H, dt,  $J = 7.5$ , 1.0 Hz), 7.26 (1H, d,  $J = 7.0$  Hz), 7.15 (1H, s, olefinic- $H$ ), 2.44-2.41 (2H, m), 1.62 (1H, septet,  $J = 6.5$  Hz), 1.44-1.39 (2H, m), 0.94 (6H, d,  $J = 6.5$  Hz);  $^{13}\text{C}\{^1\text{H}\}$  NMR ( $\text{CDCl}_3$ , DEPT-135, 125 MHz):  $\delta$  181.2 (C, C=O), 179.4 (C, C=O), 141.1 (C), 140.4 (CH), 135.8 (CH), 135.5 (C), 130.7 (C), 129.9 (CH), 129.6 (CH), 129.1 (CH), 37.3 ( $\text{CH}_2$ ), 27.8 (CH), 27.2 ( $\text{CH}_2$ ), 22.4 (2 x  $\text{CH}_3$ ); HRMS (ESI-TOF)  $m/z$ :  $[\text{M} + \text{Na}]^+$  Calcd for  $\text{C}_{15}\text{H}_{16}\text{O}_2\text{Na}$  251.1048; Found 251.1050.

**3-Isopropylnaphthalene-1,2-dione (2x):** Prepared by following the procedure A and purified by

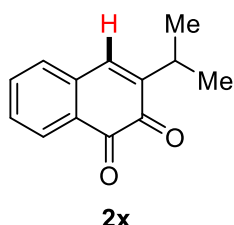

by column chromatography using EtOAc/hexane (0.4:9.6 to 0.8:9.2) and isolated as orange solid. Yield: 95% (38 mg). MP: 155-157 °C. IR (Neat):  $\nu_{\max}$  2926, 1658, 1456, 1262, 935 and 733  $\text{cm}^{-1}$ ;  $^1\text{H}$  NMR ( $\text{CDCl}_3$ , 500 MHz):  $\delta$  8.02 (1H, d,  $J = 7.5$  Hz), 7.60 (1H, dt,  $J = 7.5$ , 1.5 Hz), 7.40 (1H, dt,  $J = 7.5$ , 1.0 Hz), 7.29 (1H, d,  $J = 7.5$  Hz), 7.13 (1H, s, olefinic- $H$ ), 3.06 (1H, septet,  $J = 7.0$  Hz), 1.17 (6H, d,  $J = 7.0$  Hz);  $^{13}\text{C}\{^1\text{H}\}$  NMR ( $\text{CDCl}_3$ , DEPT-135, 125 MHz):  $\delta$  180.8 (C, C=O), 179.5 (C, C=O), 146.4 (C), 138.3 (CH), 135.8 (CH), 135.5 (C), 130.5 (C), 129.8 (CH), 129.7 (CH), 129.3 (CH), 27.1 (CH), 21.5 (2 x  $\text{CH}_3$ ); HRMS (ESI-TOF)  $m/z$ :  $[\text{M} + \text{H}]^+$  Calcd for  $\text{C}_{13}\text{H}_{13}\text{O}_2$  201.0916; Found 201.0915.

**(S)-3-(4-Nitro-3-phenylbutyl)naphthalene-1,2-dione (2y):** Prepared by following the

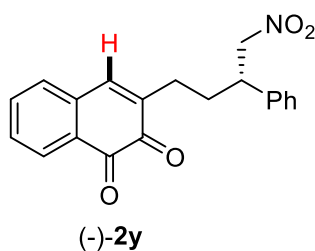

procedure **A** and purified by column chromatography using EtOAc/hexane (0.8:9.2 to 1.1:8.9) and isolated as red solid. Yield: 89% (59.7 mg). MP: 154-156 °C.  $[\alpha]_D^{25} = -30.5^\circ$  [ $c = 0.1$ ,  $\text{CHCl}_3$ ]; IR (Neat):  $\nu_{\text{max}}$  2924, 1657, 1546, 1453, 1379, 1259, 910 and 701  $\text{cm}^{-1}$ ;  $^1\text{H}$  NMR ( $\text{CDCl}_3$ , 500 MHz):  $\delta$  8.01 (1H, d,  $J = 7.5$  Hz), 7.60

(1H, dt,  $J = 7.5, 1.0$  Hz), 7.42 (1H, t,  $J = 7.5$  Hz), 7.34 (2H, t,  $J = 7.5$  Hz), 7.28-7.22 (4H, m), 7.05 (1H, s, olefinic-*H*), 4.61-4.53 (2H, m), 3.51 (1H, quintet,  $J = 7.0$  Hz), 2.33 (2H, t,  $J = 7.5$  Hz), 2.02-1.94 (2H, m);  $^{13}\text{C}\{^1\text{H}\}$  NMR ( $\text{CDCl}_3$ , DEPT-135, 125 MHz):  $\delta$  180.9 (C,  $\text{C}=\text{O}$ ), 179.0 (C,  $\text{C}=\text{O}$ ), 141.6 (CH), 139.1 (C), 138.4 (C), 135.9 (CH), 135.0 (C), 130.7 (C), 130.1 (CH), 130.0 (CH), 129.3 (CH), 129.2 (2 x CH), 128.0 (CH), 127.7 (2 x CH), 80.9 ( $\text{CH}_2$ ), 44.1 (CH), 31.1 ( $\text{CH}_2$ ), 27.5 ( $\text{CH}_2$ ); HRMS (ESI-TOF)  $m/z$ :  $[\text{M} + \text{H}]^+$  Calcd for  $\text{C}_{20}\text{H}_{18}\text{NO}_4$  336.1236; Found 336.1242.

**Dimethyl (R)-2-(3-(3,4-dioxo-3,4-dihydronaphthalen-2-yl)-1-phenylpropyl)malonate (2z):** Prepared by following the procedure **A** and purified by column chromatography using

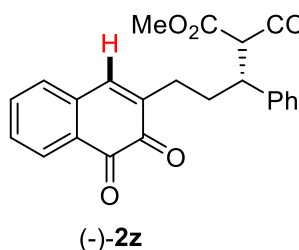

EtOAc/hexane (0.8:9.2 to 1.1:8.9) and isolated as brown liquid. Yield: 93% (76 mg). MP: 142-144 °C.  $[\alpha]_D^{25} = -41.0^\circ$  [ $c = 0.1$ ,  $\text{CHCl}_3$ ]; IR (Neat):  $\nu_{\text{max}}$  2952, 1732, 1665, 1434, 1249, 1151 and 761  $\text{cm}^{-1}$ ;  $^1\text{H}$  NMR ( $\text{CDCl}_3$ , 500 MHz):  $\delta$  8.01 (1H, d,  $J = 7.5$  Hz), 7.59 (1H, t,  $J = 7.5$  Hz), 7.41 (1H, t,  $J = 8.0$  Hz), 7.30-7.26

(2H, m), 7.24-7.16 (4H, m), 7.04 (1H, s, olefinic-*H*), 3.76 (3H, s), 3.66 (1H, d,  $J = 10.5$  Hz), 3.42 (4H, br s), 2.30-2.20 (2H, m), 1.97 (2H, q,  $J = 7.5$  Hz);  $^{13}\text{C}\{^1\text{H}\}$  NMR ( $\text{CDCl}_3$ , DEPT-135, 100 MHz):  $\delta$  181.0 (C,  $\text{C}=\text{O}$ ), 179.2 (C,  $\text{C}=\text{O}$ ), 168.7 (C,  $\text{O}-\text{C}=\text{O}$ ), 168.1 (C,  $\text{O}-\text{C}=\text{O}$ ), 141.3 (CH), 139.8 (C), 139.5 (C), 135.8 (CH), 135.3 (C), 130.7 (C), 130.0 (CH), 129.9 (CH), 129.2 (CH), 128.7 (2 x CH), 128.4 (2 x CH), 127.4 (CH), 58.7 (CH), 52.8 ( $\text{CH}_3$ ), 52.3 ( $\text{CH}_3$ ), 45.3 (CH), 31.6 ( $\text{CH}_2$ ), 27.7 ( $\text{CH}_2$ ); HRMS (ESI-TOF)  $m/z$ :  $[\text{M} + \text{Na}]^+$  Calcd for  $\text{C}_{24}\text{H}_{22}\text{NaO}_6$  429.1314; Found 429.1315.

**3-Benzyl-6-hydroxynaphthalene-1,2-dione (2aa')**: Prepared by following the procedure **A**

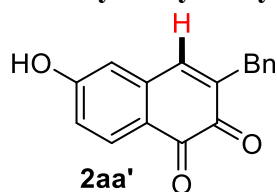

and purified by column chromatography using EtOAc/hexane (1.4:8.6 to 1.7:8.3) and isolated as wine-red solid. Yield: 85% (45 mg). MP: 185-187 °C. IR (Neat):  $\nu_{\text{max}}$  3295, 2923, 1698, 1653, 1449, 1212, 1028, 833 and 699  $\text{cm}^{-1}$ ;  $^1\text{H}$  NMR ( $\text{DMSO}-d_6$ , 500 MHz):  $\delta$  10.40 (1H, s, *OH*),

7.30-7.25 (7H, m), 7.21-7.18 (1H, m), 7.01 (1H, dd,  $J = 8.5, 3.0$  Hz), 3.61 (2H, s);  $^{13}\text{C}\{^1\text{H}\}$  NMR (DMSO- $d_6$ , DEPT-135, 125 MHz):  $\delta$  180.3 (C, C=O), 178.6 (C, C=O), 159.2 (C), 142.2 (CH), 139.1 (C), 135.0 (C), 132.4 (C), 131.7 (CH), 128.8 (2 x CH), 128.3 (2 x CH), 126.6 (C), 126.1 (CH), 121.7 (CH), 115.7 (CH), 34.5 (CH<sub>2</sub>); HRMS (ESI-TOF)  $m/z$ :  $[\text{M} + \text{H}]^+$  Calcd for C<sub>17</sub>H<sub>12</sub>NaO<sub>3</sub> 287.0684; Found 287.0683.

**2-Benzyl-7-methoxynaphthalene-1,4-dione (2aa):** Prepared by following the procedure A

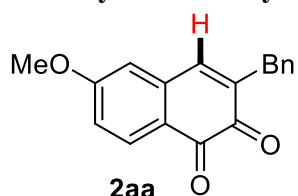

and purified by column chromatography using EtOAc/hexane (0.8:9.2 to 1.0:9.0) and isolated as orange solid. Yield: 14% (8 mg). MP: 140-142 °C. IR (Neat):  $\nu_{\text{max}}$  2918, 1654, 1593, 1426, 1215, 1015, 831 and 698  $\text{cm}^{-1}$ ;  $^1\text{H}$  NMR (CDCl<sub>3</sub>, 500 MHz):  $\delta$  7.53 (1H, d,  $J = 2.5$  Hz),

7.34-7.31 (2H, m), 7.26-7.23 (3H, m), 7.10 (1H, d,  $J = 8.5$  Hz), 7.04 (1H, dd,  $J = 8.5, 3.0$  Hz), 6.92 (1H, s, olefinic-H), 3.87 (3H, s), 3.73 (2H, s);  $^{13}\text{C}\{^1\text{H}\}$  NMR (CDCl<sub>3</sub>, DEPT-135, 125 MHz):  $\delta$  180.8 (C, C=O), 179.2 (C, C=O), 161.2 (C), 141.9 (CH), 138.1 (C), 137.1 (C), 132.0 (C), 131.1 (CH), 129.3 (2 x CH), 128.7 (2 x CH), 128.3 (C), 126.6 (CH), 121.8 (CH), 114.3 (CH), 55.8 (CH<sub>3</sub>), 35.0 (CH<sub>2</sub>); HRMS (ESI-TOF)  $m/z$ :  $[\text{M} + \text{Na}]^+$  Calcd for C<sub>18</sub>H<sub>14</sub>NaO<sub>3</sub> 301.0841; Found 301.0842.

**2-Benzyl-6-chloro-3-hydroxynaphthalene-1,4-dione (2bb):** Prepared by following the

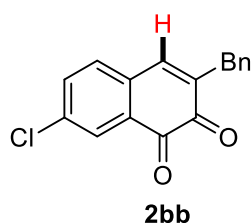

procedure A and purified by column chromatography using EtOAc/hexane (0.2:9.8 to 0.5:9.5) and isolated as orange solid. Yield: 98% (55.6 mg). MP: 129-131 °C. IR (Neat):  $\nu_{\text{max}}$  3028, 1660, 1585, 1413, 1254, 1078, 907 and 699  $\text{cm}^{-1}$ ;  $^1\text{H}$  NMR (CDCl<sub>3</sub>, 500 MHz):  $\delta$  7.98 (1H,

br s), 7.53 (1H, dd,  $J = 8.0, 2.0$  Hz), 7.34 (2H, t,  $J = 7.5$  Hz), 7.26 (3H, t,  $J = 8.0$  Hz), 7.16 (1H, d,  $J = 8.0$  Hz), 6.96 (1H, s, olefinic-H), 3.76 (2H, s);  $^{13}\text{C}\{^1\text{H}\}$  NMR (CDCl<sub>3</sub>, DEPT-135, 125 MHz):  $\delta$  179.9 (C, C=O), 178.1 (C, C=O), 140.5 (CH), 140.1 (C), 137.3 (C), 136.6 (C), 135.5 (CH), 133.4 (C), 131.5 (C), 130.6 (CH), 129.8 (CH), 129.3 (2 x CH), 128.8 (2 x CH), 126.8 (CH), 35.2 (CH<sub>2</sub>); HRMS (ESI-TOF)  $m/z$ :  $[\text{M} + \text{H}]^+$  Calcd for C<sub>17</sub>H<sub>12</sub>ClO<sub>2</sub> 283.0526; Found 283.0525.

**Naphthalene-1,2-dione (2cc):** Prepared by following the procedure A and purified by column

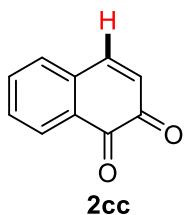

chromatography using EtOAc/hexane (0.4:9.6 to 0.8:9.2) and isolated as wine red solid. Yield: 32% (10 mg). MP: 145-147 °C. IR (Neat):  $\nu_{\text{max}}$  2921, 1650, 1589, 1301, 1136, 938, 811, 752 and 661  $\text{cm}^{-1}$ ;  $^1\text{H}$  NMR (CDCl<sub>3</sub>, 500 MHz):  $\delta$  8.11 (1H, d,  $J = 7.5$  Hz), 7.65 (1H, dt,  $J = 7.5, 1.0$  Hz), 7.51 (1H, t,  $J = 7.5$

Hz), 7.44 (1H, d,  $J = 10.5$  Hz), 7.36 (1H, d,  $J = 7.5$  Hz), 6.43 (1H, d,  $J = 10.0$  Hz);  $^{13}\text{C}\{^1\text{H}\}$  NMR ( $\text{CDCl}_3$ , DEPT-135, 125 MHz):  $\delta$  180.9 (C, C=O), 178.9 (C, C=O), 145.3 (CH), 135.8 (CH), 134.8 (C), 131.6 (C), 130.9 (CH), 130.2 (CH), 129.8 (CH), 127.9 (CH); HRMS (ESI-TOF)  $m/z$ :  $[\text{M} + \text{H}]^+$  Calcd for  $\text{C}_{10}\text{H}_7\text{O}_2$  159.0446; Found 159.0452.

**2-Benzyl-naphthalene-1,4-dione (3a):** Prepared by following the procedure **B** and purified by

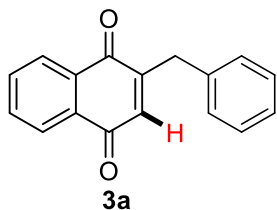

column chromatography using EtOAc/hexane (0.2:9.8 to 0.5:9.5) and isolated as yellow solid. Yield: 99% (49 mg). MP: 82-84 °C. IR (Neat):  $\nu_{\text{max}}$  2923, 1660, 1593, 1298, 1262, 939 and 701  $\text{cm}^{-1}$ ;  $^1\text{H}$  NMR ( $\text{CDCl}_3$ , 500 MHz):  $\delta$  8.12-8.08 (1H, m), 8.05-8.02 (1H, m), 7.74-7.70

(2H, m), 7.33 (2H, t,  $J = 7.5$  Hz), 7.26 (3H, m), 6.60 (1H, t,  $J = 1.5$  Hz, olefinic- $H$ ), 3.90 (2H, d,  $J = 1.5$  Hz,  $\text{CH}_2$ );  $^{13}\text{C}\{^1\text{H}\}$  NMR ( $\text{CDCl}_3$ , DEPT-135, 125 MHz):  $\delta$  185.1 (C, C=O), 184.9 (C, C=O), 150.8 (C), 136.7 (C), 135.6 (CH), 133.7 (CH), 133.6 (CH), 132.1 (C), 132.0 (C), 129.4 (2 x CH), 128.8 (2 x CH), 126.9 (CH), 126.6 (CH), 126.0 (CH), 35.7 ( $\text{CH}_2$ ); HRMS (ESI-TOF)  $m/z$ :  $[\text{M} + \text{H}]^+$  Calcd for  $\text{C}_{17}\text{H}_{13}\text{O}_2$  249.0916; Found 249.0913.

**2-(2-Fluorobenzyl)naphthalene-1,4-dione (3b):** Prepared by following the procedure **B** and

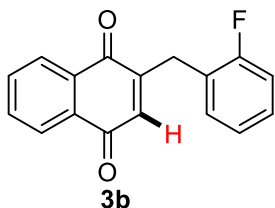

purified by column chromatography using EtOAc/hexane (0.2:9.8 to 0.5:9.5) and isolated as pale yellow solid. Yield: 93% (49.5 mg). MP: 94-96 °C. IR (Neat):  $\nu_{\text{max}}$  2922, 1663, 1593, 1491, 1300, 1232 and 759  $\text{cm}^{-1}$ ;  $^1\text{H}$  NMR ( $\text{CDCl}_3$ , 500 MHz):  $\delta$  8.14-8.10 (1H, m), 8.06-8.03 (1H, m), 7.75-7.70 (2H, m), 7.29-7.25 (2H, m), 7.12 (1H, t,  $J = 7.5$  Hz), 7.08 (1H, t,  $J = 9.5$  Hz), 6.57 (1H, s, olefinic- $H$ ), 3.94 (2H, s);  $^{13}\text{C}\{^1\text{H}\}$  NMR ( $\text{CDCl}_3$ , DEPT-135, 125 MHz):  $\delta$  185.1

(C, C=O), 184.8 (C, C=O), 161.2 (C, d,  $J = 245$  Hz, C-F), 149.4 (C), 135.5 (CH), 133.8 (CH), 133.7 (CH), 132.1 (C, d,  $J = 4.5$  Hz), 131.8 (CH, d,  $J = 4.0$  Hz), 129.1 (CH, d,  $J = 8.12$  Hz), 126.7 (CH), 126.2 (CH), 124.5 (CH, d,  $J = 3.5$  Hz), 123.8 (C), 123.7 (C), 115.7 (CH, d,  $J = 21.2$  Hz), 29.1 ( $\text{CH}_2$ , d,  $J = 2.5$  Hz);  $^{19}\text{F}$  NMR ( $\text{CDCl}_3$ , 470 MHz):  $\delta$  -117.0; HRMS (ESI-TOF)  $m/z$ :  $[\text{M} + \text{H}]^+$  Calcd for  $\text{C}_{17}\text{H}_{12}\text{FO}_2$  267.0821; Found 267.0819.

**2-(3-Fluorobenzyl)naphthalene-1,4-dione (3c):** Prepared by following the procedure **B** and

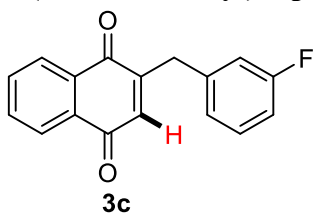

purified by column chromatography using EtOAc/hexane (0.2:9.8 to 0.5:9.5) and isolated as pale yellow solid. Yield: 99% (52.7 mg). MP: 90-92 °C. IR (Neat):  $\nu_{\text{max}}$  2923, 1659, 1585, 1482, 1242, 1137, 961 and 748  $\text{cm}^{-1}$ ;  $^1\text{H}$  NMR ( $\text{CDCl}_3$ , 500 MHz):  $\delta$  8.11-8.10 (1H, m), 8.06-8.04 (1H, m), 7.74-7.73 (2H, m), 7.30 (1H, m), 7.03 (1H, d,  $J = 7.5$  Hz), 6.96 (2H, br

m), 8.06-8.04 (1H, m), 7.74-7.73 (2H, m), 7.30 (1H, m), 7.03 (1H, d,  $J = 7.5$  Hz), 6.96 (2H, br

d,  $J = 9.5$  Hz), 6.62 (1H, s, olefinic-*H*), 3.89 (2H, s);  $^{13}\text{C}\{^1\text{H}\}$  NMR ( $\text{CDCl}_3$ , DEPT-135, 100 MHz):  $\delta$  185.5 (C, C=O), 185.3 (C, C=O), 163.5 (C, d,  $J = 245$  Hz, C-F), 150.6 (C), 139.7 (C, d,  $J = 8.0$  Hz), 136.3 (CH), 134.36 (CH), 134.30 (CH), 132.5 (2 x C), 130.8 (CH, d,  $J = 8.0$  Hz), 127.2 (CH), 126.6 (CH), 125.5 (CH, d,  $J = 3.0$  Hz), 116.8 (CH, d,  $J = 21.0$  Hz), 114.5 (CH, d,  $J = 21.0$  Hz), 35.9 ( $\text{CH}_2$ , d,  $J = 2.0$  Hz);  $^{19}\text{F}$  NMR ( $\text{CDCl}_3$ , 470 MHz):  $\delta$  -112.6; HRMS (ESI-TOF)  $m/z$ :  $[\text{M} + \text{H}]^+$  Calcd for  $\text{C}_{17}\text{H}_{12}\text{FO}_2$  267.0821; Found 267.0823.

**2-(4-Fluorobenzyl)naphthalene-1,4-dione (3d)**: Prepared by following the procedure **B** and

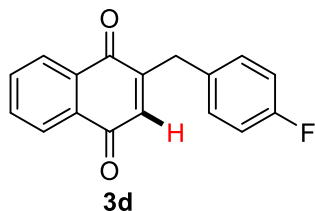

purified by column chromatography using EtOAc/hexane (0.2:9.8 to 0.5:9.5) and isolated as yellow solid. Yield: 95% (50.5 mg). MP: 94-96 °C. IR (Neat):  $\nu_{\text{max}}$  2920, 1654, 1505, 1301, 1244, 1134, 933 and 776  $\text{cm}^{-1}$ ;  $^1\text{H}$  NMR ( $\text{CDCl}_3$ , 500 MHz):  $\delta$  8.11-8.09 (1H, m),

8.06-8.04 (1H, m), 7.75-7.72 (2H, m), 7.21 (2H, dd,  $J = 8.0, 5.5$  Hz), 7.02 (2H, t,  $J = 8.5$  Hz), 6.60 (1H, s, olefinic-*H*), 3.87 (2H, s);  $^{13}\text{C}\{^1\text{H}\}$  NMR ( $\text{CDCl}_3$ , DEPT-135, 125 MHz):  $\delta$  185.0 (C, C=O), 184.9 (C, C=O), 161.9 (C, d,  $J = 243.7$  Hz, C-F), 150.6 (C), 135.6 (CH), 133.8 (CH), 133.7 (CH), 132.4 (C, d,  $J = 2.5$  Hz), 132.13 (C), 132.08 (C), 130.9 (2 x CH, d,  $J = 8.75$  Hz), 126.7 (CH), 126.1 (CH), 115.8 (2 x CH, d,  $J = 21.2$  Hz), 35.0 ( $\text{CH}_2$ );  $^{19}\text{F}$  NMR ( $\text{CDCl}_3$ , 470 MHz):  $\delta$  -116.2; HRMS (ESI-TOF)  $m/z$ :  $[\text{M} + \text{H}]^+$  Calcd for  $\text{C}_{17}\text{H}_{12}\text{FO}_2$  267.0821; Found 267.0820.

**2-(4-Chlorobenzyl)naphthalene-1,4-dione (3e)**: Prepared by following the procedure **B** and

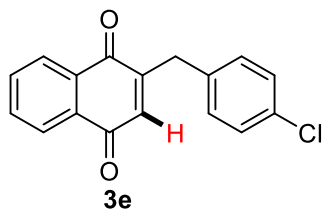

purified by column chromatography using EtOAc/hexane (0.2:9.8 to 0.5:9.5) and as yellow solid. Yield: 99% (56 mg). MP: 85-87 °C. IR (Neat):  $\nu_{\text{max}}$  2921, 1662, 1461, 1298, 1184, 1082, 966 and 775  $\text{cm}^{-1}$ ;  $^1\text{H}$  NMR ( $\text{CDCl}_3$ , 500 MHz):  $\delta$  8.11-8.08 (1H, m), 8.05-8.03

(1H, m), 7.75-7.72 (2H, m), 7.30 (2H, d,  $J = 8.5$  Hz), 7.19 (2H, d,  $J = 8.0$  Hz), 6.61 (1H, s, olefinic-*H*), 3.86 (2H, s);  $^{13}\text{C}\{^1\text{H}\}$  NMR ( $\text{CDCl}_3$ , DEPT-135, 125 MHz):  $\delta$  185.0 (C, C=O), 184.8 (C, C=O), 150.3 (C), 135.7 (CH), 135.3 (C), 133.9 (CH), 133.8 (CH), 132.9 (C), 132.1 (C), 132.0 (C), 130.7 (2 x CH), 129.0 (2 x CH), 126.7 (CH), 126.1 (CH), 35.2 ( $\text{CH}_2$ ); HRMS (ESI-TOF)  $m/z$ :  $[\text{M} + \text{H}]^+$  Calcd for  $\text{C}_{17}\text{H}_{12}\text{ClO}_2$  283.0526; Found 283.0526.

**2-(4-Bromobenzyl)naphthalene-1,4-dione (3f):** Prepared by following the procedure **B** and

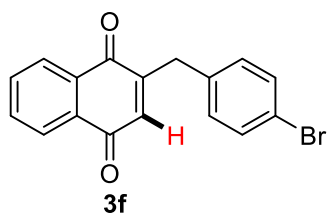

purified by column chromatography using EtOAc/hexane (0.2:9.8

to 0.5:9.5) and isolated as yellow solid. Yield: 99% (65 mg). MP:

93-95 °C. IR (Neat):  $\nu_{\max}$  2924, 1740, 1654, 1366, 1222, 1088 and

779  $\text{cm}^{-1}$ ;  $^1\text{H}$  NMR ( $\text{CDCl}_3$ , 500 MHz):  $\delta$  8.11-8.08 (1H, m), 8.06-

8.03 (1H, m), 7.77-7.72 (2H, m), 7.30 (2H, dd,  $J = 8.5, 1.5$  Hz), 7.19 (2H, dd,  $J = 7.5, 1.0$  Hz),

6.61 (1H, s, olefinic-*H*), 3.86 (2H, s);  $^{13}\text{C}\{^1\text{H}\}$  NMR ( $\text{CDCl}_3$ , DEPT-135, 125 MHz):  $\delta$  185.0

(C, C=O), 184.8 (C, C=O), 150.2 (C), 135.7 (CH), 135.2 (C), 133.8 (2 x CH), 132.9 (C), 132.0

(2 x C), 130.7 (2 x CH), 129.0 (2 x CH), 126.7 (CH), 126.1 (CH), 35.2 ( $\text{CH}_2$ ); HRMS (ESI-

TOF)  $m/z$ :  $[\text{M} + \text{Na}]^+$  Calcd for  $\text{C}_{17}\text{H}_{11}\text{BrO}_2\text{Na}$  348.9840; Found 348.9841.

**2-(4-Iodobenzyl)naphthalene-1,4-dione (3g):** Prepared by following the procedure **B** and

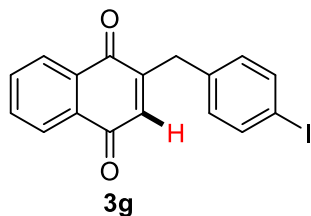

purified by column chromatography using EtOAc/hexane (0.2:9.8 to

0.5:9.5) and isolated as yellow solid. Yield: 99% (74 mg). MP: 140-

142 °C. IR (Neat):  $\nu_{\max}$  2918, 1657, 1588, 1482, 1294, 1244, 1005,

937, 857 and 781  $\text{cm}^{-1}$ .  $^1\text{H}$  NMR ( $\text{CDCl}_3$ , 500 MHz):  $\delta$  8.10-8.07

(1H, m), 8.05-8.02 (1H, m), 7.75-7.71 (2H, m), 7.65 (2H, d,  $J = 8.0$  Hz), 7.01 (2H, d,  $J = 8.5$

Hz), 6.61 (1H, s, olefinic-*H*), 3.83 (2H, s);  $^{13}\text{C}\{^1\text{H}\}$  NMR ( $\text{CDCl}_3$ , DEPT-135, 100 MHz):  $\delta$

184.9 (C, C=O), 184.8 (C, C=O), 150.1 (C), 137.9 (2 x CH), 136.4 (C), 135.7 (CH), 133.9

(CH), 133.8 (CH), 132.0 (2 x C), 131.4 (2 x CH), 126.7 (CH), 126.1 (CH), 92.4 (C), 35.3 ( $\text{CH}_2$ );

HRMS (ESI-TOF)  $m/z$ :  $[\text{M} + \text{Na}]^+$  Calcd for  $\text{C}_{17}\text{H}_{11}\text{IO}_2\text{Na}$  396.9701; Found 396.9701.

**2-(3-Methylbenzyl)naphthalene-1,4-dione (3h):** Prepared by following the procedure **B** and

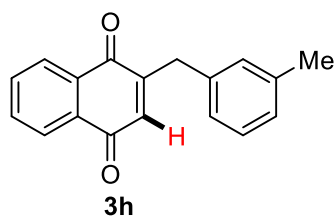

purified by column chromatography using EtOAc/hexane

(0.2:9.8 to 0.5:9.5) and isolated as yellow solid. Yield: 92% (48

mg). MP: 98-100 °C. IR (Neat):  $\nu_{\max}$  2919, 1659, 1587, 1298,

1262, 954, 895 and 742  $\text{cm}^{-1}$ .  $^1\text{H}$  NMR ( $\text{CDCl}_3$ , 500 MHz):  $\delta$

8.12-8.09 (1H, m), 8.06-8.03 (1H, m), 7.74-7.70 (2H, m), 7.22 (1H, t,  $J = 7.5$  Hz), 7.05 (3H,

m), 6.61 (1H, br s, olefinic-*H*), 3.86 (2H, s), 2.34 (3H, s);  $^{13}\text{C}\{^1\text{H}\}$  NMR ( $\text{CDCl}_3$ , DEPT-135,

125 MHz):  $\delta$  185.2 (C, C=O), 185.0 (C, C=O), 151.0 (C), 138.5 (C), 136.6 (C), 135.6 (CH),

133.7 (2 x CH), 132.2 (C), 132.1 (C), 130.1 (CH), 128.7 (CH), 127.7 (CH), 126.6 (CH), 126.4

(CH), 126.1 (CH), 35.6 ( $\text{CH}_3$ ), 21.3 ( $\text{CH}_2$ ); HRMS (ESI-TOF)  $m/z$ :  $[\text{M} + \text{H}]^+$  Calcd for

$\text{C}_{18}\text{H}_{15}\text{O}_2$  263.1072; Found 263.1076.



**2-(4-Methylbenzyl)naphthalene-1,4-dione (3i):** Prepared by following the procedure **B** and

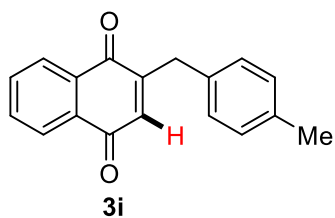

purified by column chromatography using EtOAc/hexane (0.2:9.8 to 0.5:9.5) and isolated as yellow solid. Yield: 92% (48 mg). MP: 96-98 °C. IR (Neat):  $\nu_{\max}$  2921, 1657, 1589, 1510, 1298, 1263, 807 and 751  $\text{cm}^{-1}$ .  $^1\text{H}$  NMR ( $\text{CDCl}_3$ , 500 MHz):  $\delta$

8.11-8.09 (1H, m), 8.05-8.03 (1H, m), 7.74-7.70 (2H, m), 7.14 (4H, s), 6.60 (1H, br s, olefinic-*H*), 3.86 (2H, br s), 2.33 (3H, s);  $^{13}\text{C}\{^1\text{H}\}$  NMR ( $\text{CDCl}_3$ , DEPT-135, 100 MHz):  $\delta$  185.2 (C, C=O), 185.1 (C, C=O), 151.1 (C), 136.6 (C), 135.5 (CH), 133.7 (2 x CH), 133.6 (C), 132.2 (C), 132.1 (C), 129.5 (2 x CH), 129.3 (2 x CH), 126.6 (CH), 126.1 (CH), 35.3 ( $\text{CH}_2$ ), 21.0 ( $\text{CH}_3$ ); HRMS (ESI-TOF)  $m/z$ :  $[\text{M} + \text{H}]^+$  Calcd for  $\text{C}_{18}\text{H}_{15}\text{O}_2$  263.1072; Found 263.1075.

**2-(4-Methoxybenzyl)naphthalene-1,4-dione (3j):** Prepared by following the procedure **B**

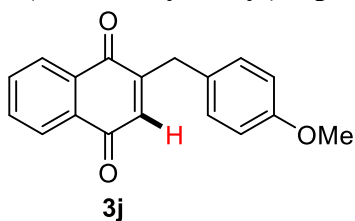

and purified by column chromatography using EtOAc/hexane (0.2:9.8 to 0.5:9.5) and isolated as yellow solid. Yield: 90% (50 mg). MP: 110-112 °C. IR (Neat):  $\nu_{\max}$  2904, 1658, 1510, 1451, 1244, 1030, 938 and 760  $\text{cm}^{-1}$ .  $^1\text{H}$  NMR ( $\text{CDCl}_3$ , 500 MHz):  $\delta$

8.10-8.08 (1H, m), 8.03-8.02 (1H, m), 7.73-7.69 (2H, m), 7.16 (2H, d,  $J = 8.5$  Hz), 6.86 (2H, d,  $J = 8.5$  Hz), 6.60 (1H, br s, olefinic-*H*), 3.83 (2H, s), 3.79 (3H, s);  $^{13}\text{C}\{^1\text{H}\}$  NMR ( $\text{CDCl}_3$ , DEPT-135, 100 MHz):  $\delta$  185.2 (C, C=O), 185.1 (C, C=O), 158.5 (C), 151.2 (C), 135.4 (CH), 133.7 (CH), 133.6 (CH), 132.1 (C), 132.0 (C), 130.4 (2 x CH), 128.5 (C), 126.6 (CH), 126.0 (CH), 114.2 (2 x CH), 55.2 ( $\text{CH}_3$ ), 34.9 ( $\text{CH}_2$ ); HRMS (ESI-TOF)  $m/z$ :  $[\text{M} + \text{H}]^+$  Calcd for  $\text{C}_{18}\text{H}_{15}\text{O}_3$  279.1021; Found 279.1024.

**2-(4-Nitrobenzyl)naphthalene-1,4-dione (3k):** Prepared by following the procedure **B** and

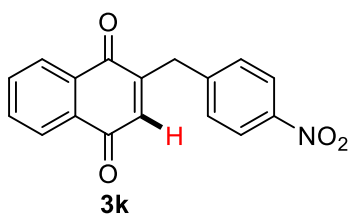

purified by column chromatography using EtOAc/hexane (0.2:9.8 to 0.5:9.5) and isolated as yellow solid. Yield: 94% (55 mg). MP: 112-114 °C. IR (Neat):  $\nu_{\max}$  3070, 1660, 1513, 1343, 1264, 1105, 905 and 726  $\text{cm}^{-1}$ .  $^1\text{H}$  NMR ( $\text{CDCl}_3$ , 500 MHz):  $\delta$  8.20 (2H, d,  $J$

= 9.0 Hz), 8.11-8.09 (1H, m), 8.08-8.06 (1H, m), 7.77-7.74 (2H, m), 7.45 (2H, d,  $J = 8.5$  Hz), 6.70 (1H, s, olefinic-*H*), 4.00 (2H, s);  $^{13}\text{C}\{^1\text{H}\}$  NMR ( $\text{CDCl}_3$ , DEPT-135, 100 MHz):  $\delta$  184.7 (C, C=O), 184.6 (C, C=O), 149.0 (C), 147.1 (C), 144.6 (C), 136.2 (CH), 134.1 (CH), 134.0 (CH), 132.0 (C), 131.9 (C), 130.2 (2 x CH), 126.8 (CH), 126.3 (CH), 124.1 (2 x CH), 35.8 ( $\text{CH}_2$ ); HRMS (ESI-TOF)  $m/z$ :  $[\text{M} + \text{H}]^+$  Calcd for  $\text{C}_{17}\text{H}_{12}\text{NO}_4$  294.0766; Found 294.0763.

**4-((1,4-Dioxo-1,4-dihydronaphthalen-2-yl)methyl)benzonitrile (3l):** Prepared by following

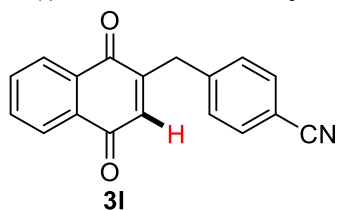

the procedure **B** and purified by column chromatography using

EtOAc/hexane (0.2:9.8 to 0.5:9.5) and isolated as yellow solid.

Yield: 99% (54 mg). MP: 111-113 °C. IR (Neat):  $\nu_{\max}$  3069, 1660,

1592, 1299, 1264, 905 and 727  $\text{cm}^{-1}$ .  $^1\text{H}$  NMR ( $\text{CDCl}_3$ , 500 MHz):

$\delta$  8.10-8.08 (1H, m), 8.07-8.04 (1H, m), 7.77-7.73 (2H, m), 7.63 (2H, d,  $J = 8.0$  Hz), 7.40 (2H,

d,  $J = 8.0$  Hz), 6.67 (1H, br s, olefinic-*H*), 3.95 (2H, s);  $^{13}\text{C}\{^1\text{H}\}$  NMR ( $\text{CDCl}_3$ , DEPT-135, 100

MHz):  $\delta$  184.7 (C, C=O), 184.6 (C, C=O), 149.2 (C), 142.6 (C), 136.1 (CH), 134.1 (CH), 133.9

(CH), 132.6 (2 x CH), 132.0 (C), 131.9 (C), 130.1 (2 x CH), 126.8 (CH), 126.3 (CH), 118.6

(C), 111.1 (C), 36.0 ( $\text{CH}_2$ ); HRMS (ESI-TOF)  $m/z$ :  $[\text{M} + \text{H}]^+$  Calcd for  $\text{C}_{18}\text{H}_{12}\text{NO}_2$  274.0868;

Found 274.0868.

**2-(2-(Trifluoromethyl)benzyl)naphthalene-1,4-dione (3m):** Prepared by following the

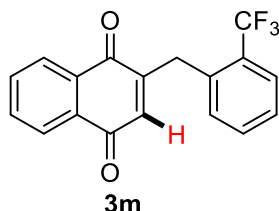

procedure **B** and purified by column chromatography using

EtOAc/hexane (0.2:9.8 to 0.5:9.5) and isolated as yellow solid. Yield:

98% (62 mg). MP: 87-89 °C. IR (Neat):  $\nu_{\max}$  2922, 1658, 1592, 1302,

1100, 1034, 938 and 766  $\text{cm}^{-1}$ .  $^1\text{H}$  NMR ( $\text{CDCl}_3$ , 500 MHz):  $\delta$  8.14

(1H, d,  $J = 7.0$  Hz), 8.03 (1H, d,  $J = 6.0$  Hz), 7.74-7.71 (3H, m), 7.53 (1H, t,  $J = 7.5$  Hz), 7.42

(1H, t,  $J = 7.5$  Hz), 7.29 (1H, d,  $J = 7.5$  Hz), 6.25 (1H, s, olefinic-*H*), 4.11 (2H, s);  $^{13}\text{C}\{^1\text{H}\}$

NMR ( $\text{CDCl}_3$ , DEPT-135, 125 MHz):  $\delta$  184.8 (C, C=O), 184.6 (C, C=O), 150.5 (C), 135.8

(CH), 135.0 (C), 133.8 (2 x CH), 132.4 (CH), 132.2 (CH), 132.0 (2 x C), 129.5 (C, q,  $J = 30$

Hz), 127.4 (CH), 126.7 (CH), 126.5 (CH, q,  $J = 5.0$  Hz), 126.2 (CH), 124.2 (C, q,  $J = 271$  Hz,

$\text{CF}_3$ ), 32.4 ( $\text{CH}_2$ );  $^{19}\text{F}$  NMR ( $\text{CDCl}_3$ , 470 MHz):  $\delta$  -60.0; HRMS (ESI-TOF)  $m/z$ :  $[\text{M} + \text{H}]^+$  Calcd

for  $\text{C}_{18}\text{H}_{12}\text{F}_3\text{O}_2$  317.0789; Found 317.0783.

**2-(3-(Trifluoromethyl)benzyl)naphthalene-1,4-dione (3n):** Prepared by following the

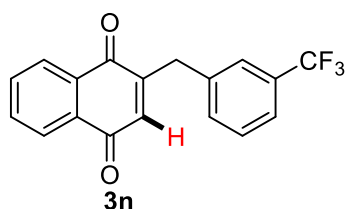

procedure **B** and purified by column chromatography using

EtOAc/hexane (0.2:9.8 to 0.5:9.5) and isolated as yellow solid.

Yield: 95% (60 mg). MP: 90-92 °C. IR (Neat):  $\nu_{\max}$  1661, 1593,

1329, 1265, 1101, 1071, 920 and 785  $\text{cm}^{-1}$ ;  $^1\text{H}$  NMR ( $\text{CDCl}_3$ ,

500 MHz):  $\delta$  8.13-8.10 (1H, m), 8.07-8.04 (1H, m), 7.76-7.72 (2H, m), 7.53 (2H, m), 7.46 (2H,

m), 6.62 (1H, br s, olefinic-*H*), 3.96 (2H, br s);  $^{13}\text{C}\{^1\text{H}\}$  NMR ( $\text{CDCl}_3$ , DEPT-135, 125 MHz):

$\delta$  184.9 (C, C=O), 184.7 (C, C=O), 149.8 (C), 137.8 (C), 135.9 (CH), 133.9 (CH), 133.8 (CH),

132.8 (CH), 132.08 (C), 132.05 (C), 131.3 (C, q,  $J = 32.5$  Hz), 129.3 (CH), 126.7 (CH), 126.2



(CH), 126.1 (CH, q,  $J = 3.75$  Hz), 124.0 (C, q,  $J = 271.2$  Hz,  $\text{CF}_3$ ), 123.9 (CH, q,  $J = 3.75$  Hz), 35.6 ( $\text{CH}_2$ );  $^{19}\text{F}$  NMR ( $\text{CDCl}_3$ , 470 MHz):  $\delta$  -62.6; HRMS (ESI-TOF)  $m/z$ :  $[\text{M} + \text{H}]^+$  Calcd for  $\text{C}_{18}\text{H}_{12}\text{F}_3\text{O}_2$  317.0789; Found 317.0792.

**2-(4-(Trifluoromethyl)benzyl)naphthalene-1,4-dione (3o)**: Prepared by following the

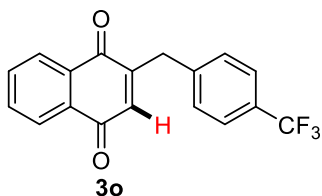

procedure **B** and purified by column chromatography using EtOAc/hexane (0.2:9.8 to 0.5:9.5) and isolated as orange solid. Yield: 99% (63 mg). MP: 85-87 °C. IR (Neat):  $\nu_{\text{max}}$  2925, 1654, 1320, 1105, 1063 and 734  $\text{cm}^{-1}$ .  $^1\text{H}$  NMR ( $\text{CDCl}_3$ , 500 MHz):  $\delta$

8.12-8.09 (1H, m), 8.07-8.04 (1H, m), 7.76-7.72 (2H, m), 7.59 (2H, d,  $J = 8.0$  Hz), 7.39 (2H, d,  $J = 8.5$  Hz), 6.64 (1H, t,  $J = 1.5$  Hz, olefinic-*H*), 3.96 (2H, s);  $^{13}\text{C}\{^1\text{H}\}$  NMR ( $\text{CDCl}_3$ , DEPT-135, 125 MHz):  $\delta$  184.8 (C,  $\text{C}=\text{O}$ ), 184.7 (C,  $\text{C}=\text{O}$ ), 149.7 (C), 141.0 (C), 135.9 (CH), 133.9 (CH), 133.8 (CH), 132.0 (2 x C), 129.7 (2 x CH), 129.4 (C, q,  $J = 32.5$  Hz), 126.7 (CH), 126.2 (CH), 125.8 (2 x CH, q,  $J = 3.75$  Hz), 124.1 (C, q,  $J = 270$  Hz,  $\text{CF}_3$ ), 35.6 ( $\text{CH}_2$ );  $^{19}\text{F}$  NMR ( $\text{CDCl}_3$ , 470 MHz):  $\delta$  -62.5; HRMS (ESI-TOF)  $m/z$ :  $[\text{M} + \text{H}]^+$  Calcd for  $\text{C}_{18}\text{H}_{12}\text{F}_3\text{O}_2$  317.0789; Found 317.0789.

**2-(Naphthalen-2-ylmethyl)naphthalene-1,4-dione (3p)**: Prepared by following the

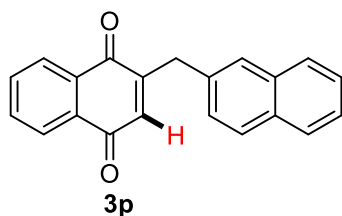

procedure **B** and purified by column chromatography using EtOAc/hexane (0.2:9.8 to 0.5:9.5) and isolated as yellow solid. Yield: 99% (59 mg). MP: 136-138 °C. IR (Neat):  $\nu_{\text{max}}$  2925, 1650, 1589, 1302, 1136, 939, 811 and 752  $\text{cm}^{-1}$ .  $^1\text{H}$  NMR ( $\text{CDCl}_3$ , 500 MHz):  $\delta$  8.13-8.10 (1H, m), 8.05-8.02 (1H, m), 7.83-7.79 (3H,

m), 7.73-7.69 (3H, m), 7.49-7.44 (2H, m), 7.35 (1H, dd,  $J = 8.5, 1.5$  Hz), 6.64 (1H, br s, olefinic-*H*), 4.06 (2H, s);  $^{13}\text{C}\{^1\text{H}\}$  NMR ( $\text{CDCl}_3$ , DEPT-135, 125 MHz):  $\delta$  185.0 (C,  $\text{C}=\text{O}$ ), 184.9 (C,  $\text{C}=\text{O}$ ), 150.7 (C), 135.7 (CH), 134.2 (C), 133.7 (CH), 133.6 (CH), 133.6 (C), 132.3 (C), 132.1 (2 x C), 128.5 (CH), 128.1 (CH), 127.6 (CH), 127.5 (CH), 127.4 (CH), 126.6 (CH), 126.2 (CH), 126.1 (CH), 125.8 (CH), 35.8 ( $\text{CH}_2$ ); HRMS (ESI-TOF)  $m/z$ :  $[\text{M} + \text{H}]^+$  Calcd for  $\text{C}_{21}\text{H}_{15}\text{O}_2$  299.1072; Found 299.1069.

**2-(Thiophen-2-ylmethyl)naphthalene-1,4-dione (3q)**: Prepared by following the procedure **B**

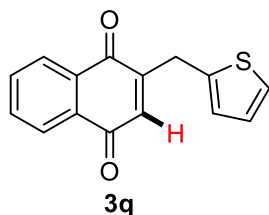

and purified by column chromatography using EtOAc/hexane (0.2:9.8 to 0.5:9.5) and isolated as pale yellow solid. Yield: 95% (48 mg). MP: 95-97 °C. IR (Neat):  $\nu_{\text{max}}$  2923, 1658, 1590, 1297, 749 and 695  $\text{cm}^{-1}$ .  $^1\text{H}$  NMR ( $\text{CDCl}_3$ , 500 MHz):  $\delta$  8.14-8.10 (1H, m), 8.07-8.04 (1H, m), 7.76-

7.71 (2H, m), 7.21 (1H, dd,  $J = 5.0, 1.0$  Hz), 6.99-6.97 (1H, m), 6.93-6.92 (1H, m), 6.72 (1H, br s, olefinic-*H*), 4.11 (2H, s);  $^{13}\text{C}\{^1\text{H}\}$  NMR ( $\text{CDCl}_3$ , DEPT-135, 100 MHz):  $\delta$  185.1 (C, C=O), 184.7 (C, C=O), 149.8 (C), 138.2 (C), 135.5 (CH), 133.9 (CH), 133.8 (CH), 132.1 (C), 132.0 (C), 127.3 (CH), 127.0 (CH), 126.7 (CH), 126.1 (CH), 125.0 (CH), 29.6 ( $\text{CH}_2$ ); HRMS (ESI-TOF)  $m/z$ :  $[\text{M} + \text{H}]^+$  Calcd for  $\text{C}_{15}\text{H}_{11}\text{O}_2\text{S}$  255.0480; Found 255.0482.

**2-Phenylnaphthalene-1,4-dione (3r):** Prepared by following the procedure **B** and purified by

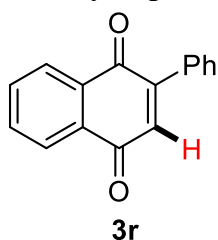

column chromatography using EtOAc/hexane (0.2:9.8 to 0.5:9.5) and isolated as yellow solid. Yield: 93% (43.6 mg). MP: 97-99 °C. IR (Neat):  $\nu_{\text{max}}$  2969, 1738, 1366, 1215 and 759  $\text{cm}^{-1}$ .  $^1\text{H}$  NMR ( $\text{CDCl}_3$ , 500 MHz):  $\delta$  8.21-8.17 (1H, m), 8.14-8.10 (1H, m), 7.80-7.75 (2H, m), 7.60-7.55 (2H, m), 7.49-7.46 (3H, m), 7.08 (1H, s, olefinic-*H*);  $^{13}\text{C}\{^1\text{H}\}$  NMR ( $\text{CDCl}_3$ ,

DEPT-135, 125 MHz):  $\delta$  185.1 (C, C=O), 184.4 (C, C=O), 148.1 (C), 135.2 (CH), 133.9 (CH), 133.8 (CH), 133.4 (C), 132.4 (C), 132.1 (C), 130.0 (CH), 129.4 (2 x CH), 128.4 (2 x CH), 127.0 (CH), 126.0 (CH); HRMS (ESI-TOF)  $m/z$ :  $[\text{M} + \text{H}]^+$  Calcd for  $\text{C}_{16}\text{H}_{11}\text{O}_2$  235.0759; Found 235.0760.

**2-Methylnaphthalene-1,4-dione [Vitamin K<sub>3</sub> or Menadione, 3s]:** Prepared by following the

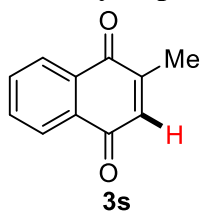

procedure **B** and purified by column chromatography using EtOAc/hexane (0.2:9.8 to 0.5:9.5) and isolated as yellow solid. Yield: 92% (31.7 mg). MP: 105-107 °C. IR (Neat):  $\nu_{\text{max}}$  2921, 1660, 1589, 1352, 1261, 1155, 939 and 777  $\text{cm}^{-1}$ .  $^1\text{H}$  NMR ( $\text{CDCl}_3$ , 500 MHz):  $\delta$  8.10-8.07 (1H, m), 8.06-8.03 (1H,

m), 7.73-7.70 (2H, m), 6.83 (1H, q,  $J = 1.5$  Hz, olefinic-*H*), 2.19 (3H, d,  $J = 1.5$  Hz,  $\text{CH}_3$ );  $^{13}\text{C}\{^1\text{H}\}$  NMR ( $\text{CDCl}_3$ , DEPT-135, 125 MHz):  $\delta$  185.5 (C, C=O), 184.9 (C, C=O), 148.1 (C), 135.6 (CH), 133.6 (CH), 133.5 (CH), 132.2 (C), 132.1 (C), 126.5 (CH), 126.1 (CH), 16.4 ( $\text{CH}_3$ ); HRMS (ESI-TOF)  $m/z$ :  $[\text{M} + \text{H}]^+$  Calcd for  $\text{C}_{11}\text{H}_9\text{O}_2$  173.0603; Found 173.0603.

**2-Ethyl-naphthalene-1,4-dione (3t):** Prepared by following the procedure **B** and purified by

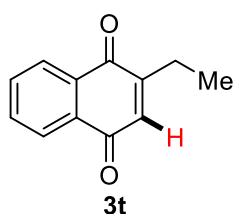

column chromatography using EtOAc/hexane (0.2:9.8 to 0.5:9.5) and isolated as pale yellow solid. Yield: 99% (37 mg). MP: 110-112 °C. IR (Neat):  $\nu_{\text{max}}$  2921, 1660, 1590, 1415, 1298, 1248, 1142, 893, 765 and 656  $\text{cm}^{-1}$ .  $^1\text{H}$  NMR ( $\text{CDCl}_3$ , 500 MHz):  $\delta$  8.12-8.09 (1H, m), 8.08-8.05 (1H,

m), 7.74-7.71 (2H, m), 6.79 (1H, t,  $J = 1.5$  Hz, olefinic-*H*), 2.62 (2H, dq,  $J = 7.5, 1.5$  Hz), 1.21 (3H, t,  $J = 7.0$  Hz);  $^{13}\text{C}\{^1\text{H}\}$  NMR ( $\text{CDCl}_3$ , DEPT-135, 125 MHz):  $\delta$  185.31 (C, C=O), 185.27 (C, C=O), 153.2 (C), 134.0 (CH), 133.64 (CH), 133.62 (CH), 132.3 (C), 132.1 (C), 126.6 (CH),

126.0 (CH), 22.6 (CH<sub>2</sub>), 11.9 (CH<sub>3</sub>); HRMS (ESI-TOF)  $m/z$ : [M + H]<sup>+</sup> Calcd for C<sub>12</sub>H<sub>11</sub>O<sub>2</sub> 187.0759; Found 187.0762.

**2-Isobutylnaphthalene-1,4-dione (3u)**: Prepared by following the procedure **B** and purified

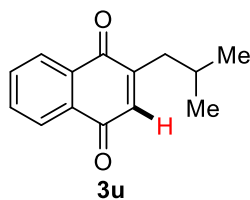

by column chromatography using EtOAc/hexane (0.2:9.8 to 0.5:9.5) and isolated as orange solid. Yield: 98% (42 mg). MP: 94-96 °C. IR (Neat):  $\nu_{\max}$  2953, 1652, 1586, 1455, 1377, 1255, 1103, 919 and 758 cm<sup>-1</sup>. <sup>1</sup>H

NMR (CDCl<sub>3</sub>, 500 MHz):  $\delta$  8.03 (1H, d,  $J$  = 7.5 Hz), 7.60 (1H, dt,  $J$  = 7.5, 1.0 Hz), 7.41 (1H, dt,  $J$  = 8.0, 1.0 Hz), 7.27 (1H, d,  $J$  = 7.5 Hz), 7.13 (1H, s, olefinic-*H*), 2.29 (2H, d,  $J$  = 7.5 Hz), 1.88 (1H, septet,  $J$  = 7.0 Hz), 0.93 (6H, td,  $J$  = 7.0, 1.5 Hz); <sup>13</sup>C{<sup>1</sup>H} NMR (CDCl<sub>3</sub>, DEPT-135, 125 MHz):  $\delta$  181.3 (C, C=O), 179.4 (C, C=O), 141.8 (CH), 139.7 (C), 135.8 (CH), 135.4 (C), 130.7 (C), 129.9 (CH), 129.7 (CH), 129.1 (CH), 38.7 (CH<sub>2</sub>), 27.5 (CH), 22.4 (2 x CH<sub>3</sub>); HRMS (ESI-TOF)  $m/z$ : [M + H]<sup>+</sup> Calcd for C<sub>14</sub>H<sub>15</sub>O<sub>2</sub> 215.1072; Found 215.1071.

**2-Pentylnaphthalene-1,4-dione (3v)**: Prepared by following the procedure **B** and purified by

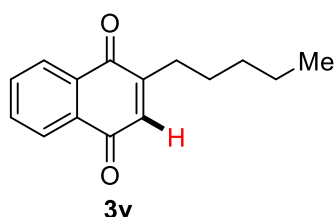

column chromatography using EtOAc/hexane (0.2:9.8 to 0.5:9.5) and isolated as yellow solid. Yield: 95% (43 mg). MP: 120-122 °C. IR (Neat):  $\nu_{\max}$  2927, 1659, 1593, 1299, 896, 750 and 661 cm<sup>-1</sup>. <sup>1</sup>H NMR (CDCl<sub>3</sub>, 500 MHz):  $\delta$  8.10-8.08 (1H, m), 8.06-8.03

(1H, m), 7.73-7.70 (2H, m), 6.78 (1H, br s, olefinic-*H*), 2.55 (2H, dt,  $J$  = 7.5, 1.0 Hz), 1.58 (2H, quintet,  $J$  = 7.5 Hz), 1.40-1.31 (4H, m), 0.90 (3H, t,  $J$  = 7.0 Hz); <sup>13</sup>C{<sup>1</sup>H} NMR (CDCl<sub>3</sub>, DEPT-135, 125 MHz):  $\delta$  185.2 (2 x C, 2 x C=O), 152.0 (C), 134.7 (CH), 133.6 (CH), 133.5 (CH), 132.3 (C), 132.1 (C), 126.6 (CH), 126.0 (CH), 31.5 (CH<sub>2</sub>), 29.5 (CH<sub>2</sub>), 27.7 (CH<sub>2</sub>), 22.4 (CH<sub>2</sub>), 13.9 (CH<sub>3</sub>); HRMS (ESI-TOF)  $m/z$ : [M + H]<sup>+</sup> Calcd for C<sub>15</sub>H<sub>17</sub>O<sub>2</sub> 229.1229; Found 229.1229.

**2-Isopentylnaphthalene-1,4-dione (3w)**: Prepared by following the procedure **B** and purified

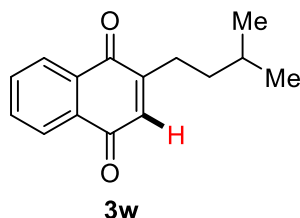

by column chromatography using EtOAc/hexane (0.2:9.8 to 0.5:9.5) and isolated as yellow solid. Yield: 97% (45.6 mg). MP: 132-134 °C. IR (Neat):  $\nu_{\max}$  2953, 1651, 1592, 1467, 1304, 1141, 933, 753 and 662 cm<sup>-1</sup>. <sup>1</sup>H NMR (CDCl<sub>3</sub>, 500 MHz):  $\delta$  8.09-8.07 (1H, m),

8.05-8.03 (1H, m), 7.72-7.70 (2H, m), 6.78 (1H, br s, olefinic-*H*), 2.56 (2H, t,  $J$  = 8.0 Hz), 1.65 (1H, septet,  $J$  = 6.5 Hz), 1.44 (2H, br q,  $J$  = 6.5 Hz), 0.95 (6H, d,  $J$  = 6.5 Hz); <sup>13</sup>C{<sup>1</sup>H} NMR (CDCl<sub>3</sub>, DEPT-135, 100 MHz):  $\delta$  185.2 (2 x C, 2 x C=O), 152.3 (C), 134.6 (CH), 133.6 (2 x

CH), 132.3 (C), 132.0 (C), 126.5 (CH), 126.0 (CH), 37.0 (CH<sub>2</sub>), 27.9 (CH), 27.5 (CH<sub>2</sub>), 22.4 (2 x CH<sub>3</sub>); HRMS (ESI-TOF) *m/z*: [M + H]<sup>+</sup> Calcd for C<sub>15</sub>H<sub>17</sub>O<sub>2</sub> 229.1229; Found 229.1224.

**2-Isopropyl naphthalene-1,4-dione (3x):** Prepared by following the procedure **B** and purified

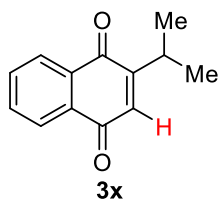

by column chromatography using EtOAc/hexane (0.2:9.8 to 0.5:9.5) and isolated as yellow solid. Yield: 99% (39.6 mg). MP: 96-98 °C. IR (Neat):  $\nu_{\max}$  2964, 1658, 1593, 1327, 1250, 932 and 717 cm<sup>-1</sup>; <sup>1</sup>H NMR (CDCl<sub>3</sub>, 500 MHz):  $\delta$  8.11-8.08 (1H, m), 8.06-8.03 (1H, m), 7.73-7.69 (2H, m), 6.76

(1H, d, *J* = 1.0 Hz, olefinic-*H*), 3.28-3.20 (1H, m), 1.19 (6H, d, *J* = 7.0 Hz); <sup>13</sup>C {<sup>1</sup>H} NMR (CDCl<sub>3</sub>, DEPT-135, 100 MHz):  $\delta$  185.5 (C, C=O), 184.8 (C, C=O), 157.3 (C), 133.6 (CH), 133.5 (CH), 132.6 (CH), 132.5 (C), 131.9 (C), 126.6 (CH), 125.9 (CH), 27.0 (CH), 21.5 (2 x CH<sub>3</sub>); HRMS (ESI-TOF) *m/z*: [M + H]<sup>+</sup> Calcd for C<sub>13</sub>H<sub>13</sub>O<sub>2</sub> 201.0916; Found 201.0915.

**(S)-2-(4-Nitro-3-phenylbutyl) naphthalene-1,4-dione (3y):** Prepared by following the

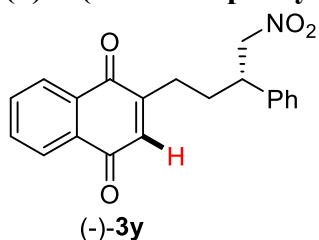

procedure **B** and purified by column chromatography using EtOAc/hexane (0.2:9.8 to 0.5:9.5) and isolated as red solid. Yield: 99% (66 mg). MP: 118-120 °C. [ $\alpha$ ]<sub>D</sub><sup>25</sup> = -32.0° [*c* = 0.1, CHCl<sub>3</sub>]. IR (Neat):  $\nu_{\max}$  2929, 1701, 1547, 1374, 1280, 734 and 697 cm<sup>-1</sup>; <sup>1</sup>H

NMR (CDCl<sub>3</sub>, 500 MHz):  $\delta$  8.72-8.03 (2H, m), 7.75-7.70 (2H, m), 7.38-7.33 (2H, m), 7.29-7.26 (1H, m), 7.24-7.21 (2H, m), 6.68 (1H, t, *J* = 1.5 Hz, olefinic-*H*), 4.62-4.54 (2H, m), 3.55 (1H, quintet, *J* = 8.0 Hz), 2.49-2.42 (2H, m), 2.05-2.00 (2H, m); <sup>13</sup>C {<sup>1</sup>H} NMR (CDCl<sub>3</sub>, DEPT-135, 125 MHz):  $\delta$  184.9 (C, C=O), 184.8 (C, C=O), 150.3 (C), 138.2 (C), 135.3 (CH), 133.8 (CH), 133.7 (CH), 132.1 (C), 130. (C), 129.2 (2 x CH), 128.1 (CH), 127.7 (2 x CH), 126.6 (CH), 126.1 (CH), 80.7 (CH<sub>2</sub>), 44.2 (CH), 31.1 (CH<sub>2</sub>), 27.7 (CH<sub>2</sub>); HRMS (ESI-TOF) *m/z*: [M + H]<sup>+</sup> Calcd for C<sub>20</sub>H<sub>18</sub>NO<sub>4</sub> 336.1236; Found 336.1236.

**Dimethyl (R)-2-(3-(1,4-dioxo-1,4-dihydronaphthalen-2-yl)-1-phenylpropyl)malonate**

**(3z):** Prepared by following the procedure **B** and purified by column chromatography using

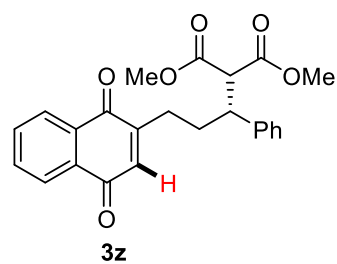

EtOAc/hexane (0.4:9.6 to 0.8:9.2) and isolated as brown solid. Yield: 94% (76 mg). MP: 120-122 °C. [ $\alpha$ ]<sub>D</sub><sup>25</sup> = -15.0° [*c* = 0.1, CHCl<sub>3</sub>]. IR (Neat):  $\nu_{\max}$  2921, 1731, 1661, 1455, 1259, 1152 and 700 cm<sup>-1</sup>. <sup>1</sup>H NMR (CDCl<sub>3</sub>, 500 MHz):  $\delta$  8.05-8.02 (2H, m), 7.71-7.69 (2H, m), 7.29 (2H, t, *J* = 7.5 Hz), 7.22-7.18 (3H, m), 6.67 (1H,

*s*, olefinic-*H*), 3.76 (3H, *s*), 3.68 (1H, d, *J* = 10.5 Hz), 3.47-3.42 (4H, m), 2.39-2.36 (2H, m), 2.04-1.96 (2H, m); <sup>13</sup>C {<sup>1</sup>H} NMR (CDCl<sub>3</sub>, DEPT-135, 100 MHz):  $\delta$  185.0 (2 x C, 2 x C=O),

168.6 (C, O-C=O), 167.9 (C, O-C=O), 150.8 (C), 139.5 (C), 135.0 (CH), 133.6 (2 x CH), 132.2 (C), 132.0 (C), 128.7 (2 x CH), 128.3 (2 x CH), 127.4 (CH), 126.5 (CH), 126.0 (CH), 58.5 (CH), 52.7 (CH<sub>3</sub>), 52.3 (CH<sub>3</sub>), 45.3 (CH), 31.6 (CH<sub>2</sub>), 27.8 (CH<sub>2</sub>); HRMS (ESI-TOF) *m/z*: [M + Na]<sup>+</sup> Calcd for C<sub>24</sub>H<sub>22</sub>O<sub>6</sub>Na 429.1314; Found 429.1319.

**2-Benzyl-7-methoxynaphthalene-1,4-dione (3aa):** Prepared by following the procedure **B**

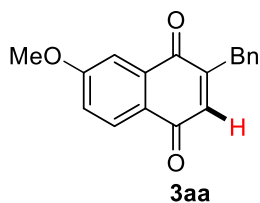

and purified by column chromatography using EtOAc/hexane (0.2:9.8 to 0.5:9.5) and isolated as yellow solid. Yield: 93% (52 mg). MP: 92-93 °C. IR (Neat):  $\nu_{\max}$  2921, 1743, 1654, 1591, 1492, 1313, 1067, 841 and 705 cm<sup>-1</sup>; <sup>1</sup>H NMR (CDCl<sub>3</sub>, 500 MHz):  $\delta$  7.99 (1H, d, *J* = 8.5 Hz), 7.53 (1H, br s), 7.34 (2H, t, *J* = 7.5 Hz), 7.26 (3H, t, *J* = 7.5 Hz), 7.18 (1H, dd, *J* = 8.5, 2.0), 6.55 (1H, s, olefinic-*H*), 3.94 (3H, s) 3.88 (2H, s); <sup>13</sup>C {<sup>1</sup>H} NMR (CDCl<sub>3</sub>, DEPT-135, 125 MHz):  $\delta$  185.1 (C, C=O), 184.3 (C, C=O), 164.0 (C), 150.3 (C), 136.8 (C), 135.9 (CH), 134.2 (C), 129.4 (2 x CH), 128.8 (2 x CH), 128.5 (CH), 126.9 (CH), 125.7 (C), 120.3 (CH), 110.0 (CH), 55.9 (CH<sub>3</sub>), 35.7 (CH<sub>2</sub>); HRMS (ESI-TOF) *m/z*: [M + H]<sup>+</sup> Calcd for C<sub>18</sub>H<sub>15</sub>O<sub>3</sub> 279.1021; Found 279.1027.

**2-Benzyl-6-chloronaphthalene-1,4-dione (3bb):** Prepared by following the procedure **B** and

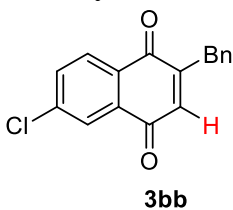

purified by column chromatography using EtOAc/hexane (0.2:9.8 to 0.5:9.5) and isolated as yellow solid. Yield: 95% (54 mg). MP: 94-96 °C. IR (Neat):  $\nu_{\max}$  3030, 1663, 1586, 1494, 1287, 1067, 841 and 700 cm<sup>-1</sup>. <sup>1</sup>H NMR (CDCl<sub>3</sub>, 500 MHz):  $\delta$  8.05 (1H, d, *J* = 8.5 Hz), 8.00 (1H, d, *J* = 2.0 Hz), 7.68 (1H, dd, *J* = 8.2, 2.0 Hz), 7.34 (2H, t, *J* = 7.0 Hz), 7.28-7.23 (3H, m), 6.61 (1H, s, olefinic-*H*), 3.90 (2H, CH<sub>2</sub>); <sup>13</sup>C {<sup>1</sup>H} NMR (CDCl<sub>3</sub>, DEPT-135, 125 MHz):  $\delta$  184.0 (2 x C, 2 x C=O), 151.2 (C), 140.8 (C), 136.4 (C), 135.4 (CH), 133.7 (CH), 133.2 (C), 130.3 (C), 129.4 (2 x CH), 128.9 (2 x CH), 128.4 (CH), 127.1 (CH), 126.2 (CH), 35.7 (CH<sub>2</sub>); HRMS (ESI-TOF) *m/z*: [M + H]<sup>+</sup> Calcd for C<sub>17</sub>H<sub>12</sub>ClO<sub>2</sub> 283.0526; Found 283.0519.

**Naphthalene-1,4-dione (3cc):** Prepared by following the procedure **B** and purified by column

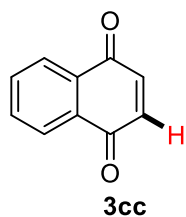

chromatography using EtOAc/hexane (0.2:9.8 to 0.5:9.5) and isolated as yellow solid. Yield: 95% (30 mg). MP: 121-122 °C. IR (Neat):  $\nu_{\max}$  2923, 1655, 1586, 1327, 1298, 1144, 1054, 861 and 764 cm<sup>-1</sup>. <sup>1</sup>H NMR (CDCl<sub>3</sub>, 500 MHz):  $\delta$  8.08-8.06 (2H, m), 7.76-7.74 (2H, m), 6.97 (2H, s, olefinic-*H*); <sup>13</sup>C {<sup>1</sup>H} NMR (CDCl<sub>3</sub>, DEPT-135, 100 MHz):  $\delta$  185.0 (2 x C, 2 x C=O), 138.6 (2 x CH), 133.9

(2 x CH), 131.8 (2 x C), 126.4 (2 x CH); HRMS (ESI-TOF)  $m/z$ :  $[M + H]^+$  Calcd for  $C_{10}H_7O_2$  159.0446; Found 159.0445.

**2-Benzyl-3-chloronaphthalene-1,4-dione (4a):** Prepared by following the procedure C and

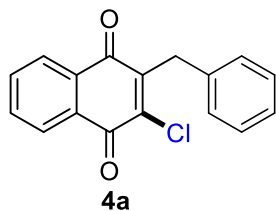

purified by column chromatography using EtOAc/hexane (0.2:9.8 to

0.5:9.5) and isolated as yellow solid. Yield: 95% (80.6 mg). MP: 159-

161 °C. IR (Neat):  $\nu_{max}$  1668, 1592, 1277, 1150, 951, 845 and 711  $cm^{-1}$

$^1H$  NMR ( $CDCl_3$ , 500 MHz):  $\delta$  8.17-8.14 (1H, m), 8.13-8.10 (1H,

m), 7.77-7.72 (2H, m), 7.37 (2H, d,  $J = 8.0$  Hz), 7.28 (2H, t,  $J = 7.5$  Hz), 7.21 (1H, t,  $J = 7.5$

Hz), 4.18 (2H, s);  $^{13}C\{^1H\}$  NMR ( $CDCl_3$ , DEPT-135, 125 MHz):  $\delta$  182.3 (C, C=O), 177.9 (C,

C=O), 146.4 (C), 143.7 (C), 136.7 (C), 134.2 (CH), 133.9 (CH), 131.6 (C), 131.3 (C), 129.2 (2

x CH), 128.6 (2 x CH), 127.1 (2 x CH), 126.8 (CH), 33.9 ( $CH_2$ ); HRMS (ESI-TOF)  $m/z$ :  $[M +$

$H]^+$  Calcd for  $C_{17}H_{12}ClO_2$  283.0526; Found 283.0526.

**2-Chloro-3-(2-fluorobenzyl)naphthalene-1,4-dione (4b):** Prepared by following the

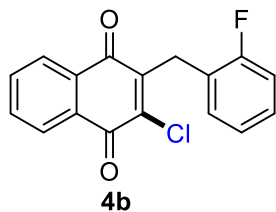

procedure C and purified by column chromatography using

EtOAc/hexane (0.2:9.8 to 0.5:9.5) and isolated as pale yellow solid.

Yield: 99% (89.5 mg). MP: 141-143 °C. IR (Neat):  $\nu_{max}$  2921, 1664,

1588, 1489, 1275, 1092, 954 and 705  $cm^{-1}$ .  $^1H$  NMR ( $CDCl_3$ , 500

MHz):  $\delta$  8.18-8.16 (1H, m), 8.13-8.11 (1H, m), 7.78-7.74 (2H, m), 7.22-7.18 (2H, m), 7.05-

7.01 (2H, m), 4.21 (2H, s);  $^{13}C\{^1H\}$  NMR ( $CDCl_3$ , DEPT-135, 100 MHz):  $\delta$  182.1 (C, C=O),

177.8 (C, C=O), 160.5 (C, d,  $J = 245$  Hz, C-F), 145.6 (C), 144.7 (C), 134.3 (CH), 134.0 (CH),

131.6 (C), 131.4 (C), 130.4 (CH, d,  $J = 4.0$  Hz), 128.5 (CH, d,  $J = 8.0$  Hz), 127.3 (CH), 127.2

(CH), 124.1 (CH, d,  $J = 3.0$  Hz), 123.7 (C, d,  $J = 16.0$  Hz), 115.6 (CH, d,  $J = 22.0$  Hz), 27.2

( $CH_2$ , d,  $J = 4.0$  Hz);  $^{19}F$  NMR ( $CDCl_3$ , 375 MHz):  $\delta$  -115.7; HRMS (ESI-TOF)  $m/z$ :  $[M +$

$Na]^+$  Calcd for  $C_{17}H_{10}ClFO_2Na$  323.0251; Found 323.0256.

**2-Chloro-3-(3-fluorobenzyl)naphthalene-1,4-dione (4c):** Prepared by following the

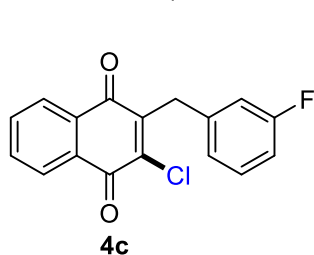

procedure C and purified by column chromatography using

EtOAc/hexane (0.2:9.8 to 0.5:9.5) and isolated as pale yellow solid.

Yield: 99% (89 mg). MP: 135-136 °C. IR (Neat):  $\nu_{max}$  3069, 1670,

1589, 1485, 1279, 1137, 955, 844 and 712  $cm^{-1}$ .  $^1H$  NMR ( $CDCl_3$ ,

500 MHz):  $\delta$  8.18-8.15 (1H, m), 8.14-8.11 (1H, m), 7.79-7.74 (2H,

m), 7.23 (1H, br dt,  $J = 8.5, 2.0$  Hz), 7.15 (1H, br d,  $J = 7.5$  Hz), 7.07 (1H, br d,  $J = 10.0$  Hz),

6.91 (1H, br dt,  $J = 8.5, 2.0$  Hz), 4.17 (2H, s);  $^{13}C\{^1H\}$  NMR ( $CDCl_3$ , DEPT-135, 125 MHz):



$\delta$  182.3 (C, C=O), 177.8 (C, C=O), 162.8 (C, d,  $J$  = 243.7 Hz, C-F), 145.7 (C), 144.0 (C), 139.0 (C, d,  $J$  = 7.5 Hz), 134.4 (CH), 134.1 (CH), 131.5 (C), 131.3 (C), 130.0 (CH, d,  $J$  = 8.75 Hz), 127.3 (CH), 127.2 (CH), 124.8 (CH, d,  $J$  = 2.5 Hz), 116.1 (CH, d,  $J$  = 21.2 Hz), 113.8 (CH, d,  $J$  = 20.0 Hz), 33.6 (CH<sub>2</sub>, d,  $J$  = 1.25 Hz); <sup>19</sup>F NMR (CDCl<sub>3</sub>, 470 MHz):  $\delta$  -112.8; HRMS (ESI-TOF)  $m/z$ : [M + Na]<sup>+</sup> Calcd for C<sub>17</sub>H<sub>10</sub>ClFO<sub>2</sub>Na 323.0251; Found 323.0250.

**2-Chloro-3-(4-fluorobenzyl)naphthalene-1,4-dione (4d):** Prepared by following the

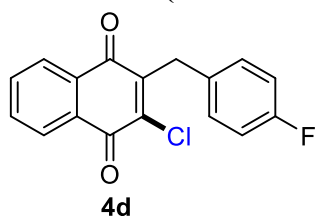

procedure C and purified by column chromatography using EtOAc/hexane (0.2:9.8 to 0.5:9.5) and isolated as yellow solid.

Yield: >99% (90 mg). MP: 121-122 °C. IR (Neat):  $\nu_{\max}$  2968, 1739, 1661, 1368, 1217, 844 and 704 cm<sup>-1</sup>. <sup>1</sup>H NMR (CDCl<sub>3</sub>, 500 MHz):

$\delta$  8.15-8.13 (1H, m), 8.12-8.10 (1H, m), 7.77-7.72 (2H, m), 7.34 (2H, dd,  $J$  = 8.5, 5.5 Hz), 6.96 (2H, t,  $J$  = 9.0 Hz), 4.14 (2H, s); <sup>13</sup>C {<sup>1</sup>H} NMR (CDCl<sub>3</sub>, DEPT-135, 125 MHz):  $\delta$  182.3 (C, C=O), 177.8 (C, C=O), 161.8 (C, d,  $J$  = 244 Hz, C-F), 146.2 (C), 143.6 (C), 134.3 (CH), 134.1 (CH), 132.3 (C, d,  $J$  = 2.5 Hz), 131.5 (C), 131.3 (C), 130.7 (2 x CH, d,  $J$  = 7.5 Hz), 127.2 (CH), 127.1 (CH), 115.4 (2 x CH, d,  $J$  = 21.2 Hz), 33.1 (CH<sub>2</sub>); <sup>19</sup>F NMR (CDCl<sub>3</sub> 470 MHz):  $\delta$  -115.7; HRMS (ESI-TOF)  $m/z$ : [M + Na]<sup>+</sup> Calcd for C<sub>17</sub>H<sub>10</sub>ClFO<sub>2</sub>Na 323.0251; Found 323.0251.

**2-Chloro-3-(4-Chlorobenzyl)naphthalene-1,4-dione (4e):** Prepared by following the

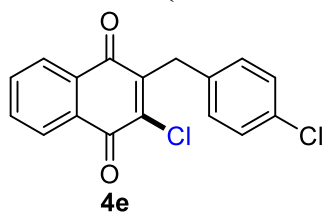

procedure C and purified by column chromatography using EtOAc/hexane (0.2:9.8 to 0.5:9.5) and isolated as yellow solid.

Yield: 95% (90 mg). MP: 131-133 °C. IR (Neat):  $\nu_{\max}$  1671, 1588, 1486, 1321, 1280, 1149, 1088, 953, 845, and 787 cm<sup>-1</sup>. <sup>1</sup>H NMR

(CDCl<sub>3</sub>, 500 MHz):  $\delta$  8.17-8.14 (1H, m), 8.12-8.10 (1H, m), 7.78-7.73 (2H, m), 7.31 (2H, d,  $J$  = 8.5 Hz), 7.24 (2H, d,  $J$  = 8.5 Hz), 4.14 (2H, s); <sup>13</sup>C {<sup>1</sup>H} NMR (CDCl<sub>3</sub>, DEPT-135, 125 MHz):  $\delta$  182.3 (C, C=O), 177.7 (C, C=O), 145.9 (C), 143.8 (C), 135.1 (C), 134.3 (CH), 134.1 (CH), 132.8 (C), 131.5 (C), 131.3 (C), 130.5 (2 x CH), 128.8 (2 x CH), 127.2 (CH), 127.1 (CH), 33.3 (CH<sub>2</sub>); HRMS (ESI-TOF)  $m/z$ : [M + H]<sup>+</sup> Calcd for C<sub>17</sub>H<sub>11</sub>Cl<sub>2</sub>O<sub>2</sub> 317.0136; Found 317.0134.

**2-(4-Bromobenzyl)-3-chloronaphthalene-1,4-dione (4f):** Prepared by following the

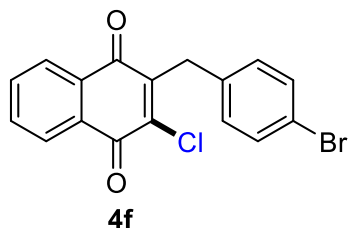

procedure C and purified by column chromatography using EtOAc/hexane (0.2:9.8 to 0.5:9.5) and isolated as yellow solid.

Yield: 98% (106 mg). MP: 135-137 °C. IR (Neat):  $\nu_{\max}$  2923, 1670, 1588, 1486, 1321, 1279, 1088, 844 and 702  $\text{cm}^{-1}$ .  $^1\text{H}$  NMR ( $\text{CDCl}_3$ , 500 MHz):  $\delta$  8.16-8.13 (1H, m), 8.12-8.08 (1H, m), 7.81-7.72 (2H, m), 7.31 (2H, d,  $J = 8.0$  Hz), 7.24 (2H, d,  $J = 8.0$  Hz), 4.13 (2H, s);  $^{13}\text{C}\{^1\text{H}\}$  NMR ( $\text{CDCl}_3$ , DEPT-135, 100 MHz):  $\delta$  182.3 (C, C=O), 177.8 (C, C=O), 145.9 (C), 143.8 (C), 135.1 (C), 134.3 (CH), 134.1 (CH), 132.8 (C), 131.5 (C), 131.3 (C), 130.5 (2 x CH), 128.8 (2 x CH), 127.2 (CH), 127.1 (CH), 33.3 ( $\text{CH}_2$ ); HRMS (ESI-TOF)  $m/z$ :  $[\text{M} + \text{Na}]^+$  Calcd for  $\text{C}_{17}\text{H}_{10}\text{BrClO}_2\text{Na}$  382.9450; Found 382.9452.

**2-Chloro-3-(4-iodobenzyl)naphthalene-1,4-dione (4g):** Prepared by following the procedure

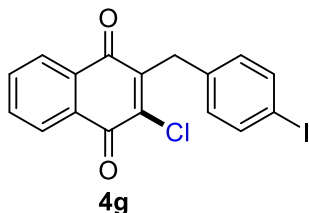

C and purified by column chromatography using EtOAc/hexane (0.2:9.8 to 0.5:9.5) and isolated as yellow solid. Yield: 95% (116 mg). MP: 161-163 °C. IR (Neat):  $\nu_{\max}$  2922, 1670, 1587, 1479, 1276, 1002, 845 and 750  $\text{cm}^{-1}$ .  $^1\text{H}$  NMR ( $\text{CDCl}_3$ , 500 MHz):  $\delta$  8.17-8.13

(1H, m), 8.12-8.09 (1H, m), 7.77-7.72 (2H, m), 7.59 (2H, td,  $J = 8.5, 2.5$  Hz), 7.12 (2H, td,  $J = 8.0, 2.5$  Hz), 4.10 (2H,  $\text{CH}_2$ );  $^{13}\text{C}\{^1\text{H}\}$  NMR ( $\text{CDCl}_3$ , DEPT-135, 100 MHz):  $\delta$  182.3 (C, C=O), 177.7 (C, C=O), 145.8 (C), 143.9 (C), 137.7 (2 x CH), 136.3 (C), 134.3 (CH), 134.1 (CH), 131.5 (C), 131.2 (C, 2 x CH), 127.2 (CH), 127.1 (CH), 92.3 (C), 33.4 ( $\text{CH}_2$ ); HRMS (ESI-TOF)  $m/z$ :  $[\text{M} + \text{NH}_4]^+$  Calcd for  $\text{C}_{17}\text{H}_{14}\text{NClIO}_2$  425.9758; Found 425.9757.

**2-Chloro-3-(3-methylbenzyl)naphthalene-1,4-dione (4h):** Prepared by following the

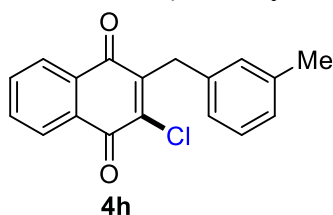

procedure C and purified by column chromatography using EtOAc/hexane (0.2:9.8 to 0.5:9.5) and isolated as yellow solid. Yield: 97% (86 mg). MP: 157-160 °C. IR (Neat):  $\nu_{\max}$  2919, 1668, 1590, 1489, 1275, 1149, 954, 846 and 781  $\text{cm}^{-1}$ .  $^1\text{H}$  NMR ( $\text{CDCl}_3$ ,

500 MHz):  $\delta$  8.17-8.14 (1H, m), 8.13- 8.10 (1H, m), 7.77-7.72 (2H, m), 7.17-7.16 (3H, m), 7.03-7.01 (1H, m), 4.15 (2H, s), 2.31 (3H, s);  $^{13}\text{C}\{^1\text{H}\}$  NMR ( $\text{CDCl}_3$ , DEPT-135, 125 MHz):  $\delta$  182.4 (C, C=O), 178.0 (C, C=O), 146.5 (C), 143.7 (C), 138.3 (C), 136.6 (C), 134.2 (CH), 134.0 (CH), 131.7 (C), 131.3 (C), 129.8 (CH), 128.5 (CH), 127.6 (CH), 127.2 (2 x CH), 126.2 (CH), 33.8 ( $\text{CH}_2$ ), 21.4 ( $\text{CH}_3$ ); HRMS (ESI-TOF)  $m/z$ :  $[\text{M} + \text{H}]^+$  Calcd for  $\text{C}_{18}\text{H}_{14}\text{ClO}_2$  297.0682; Found 297.0682.



**2-Chloro-3-(4-methylbenzyl)naphthalene-1,4-dione (4i):** Prepared by following the

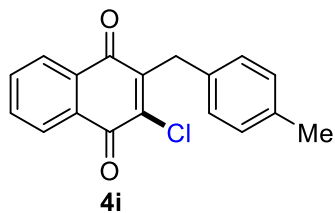

procedure C and purified by column chromatography using

EtOAc/hexane (0.2:9.8 to 0.5:9.5) and isolated as yellow solid.

Yield: 93% (83 mg). MP: 156-158 °C. IR (Neat):  $\nu_{\max}$  2918, 1666,

1592, 1280, 1150, 955, 847 and 703  $\text{cm}^{-1}$ .  $^1\text{H}$  NMR ( $\text{CDCl}_3$ , 500

MHz):  $\delta$  8.16-8.13 (1H, m), 8.12-8.09 (1H, m), 7.76-7.71 (2H, m), 7.26 (2H, d,  $J = 8.0$  Hz),

7.08 (2H, d,  $J = 7.5$  Hz), 4.14 (2H, s), 2.29 (3H, s);  $^{13}\text{C}\{^1\text{H}\}$  NMR ( $\text{CDCl}_3$ , DEPT-135, 125

MHz):  $\delta$  182.4 (C, C=O), 178.0 (C, C=O), 146.6 (C), 143.5 (C), 136.5 (C), 134.2 (CH), 134.0

(CH), 133.6 (C), 131.7 (C), 131.3 (C), 129.3 (2 x CH), 129.1 (2 x CH), 127.1 (2 x CH), 33.5

( $\text{CH}_2$ ), 21.0 ( $\text{CH}_3$ ); HRMS (ESI-TOF)  $m/z$ :  $[\text{M} + \text{H}]^+$  Calcd for  $\text{C}_{18}\text{H}_{14}\text{ClO}_2$  297.0682; Found

297.0679.

**2-Chloro-3-(4-methoxybenzyl)naphthalene-1,4-dione (4j):** Prepared by following the

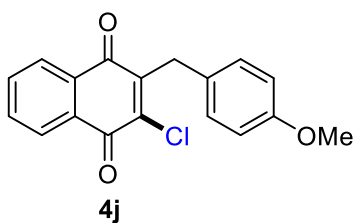

procedure C and purified by column chromatography using

EtOAc/hexane (0.2:9.8 to 0.5:9.5) and isolated as yellow solid.

Yield: 96% (89.7 mg). MP: 161-163 °C. IR (Neat):  $\nu_{\max}$  2924,

1660, 1510, 1276, 1153, 1031, 845 and 705  $\text{cm}^{-1}$ .  $^1\text{H}$  NMR

( $\text{CDCl}_3$ , 500 MHz):  $\delta$  8.15-8.13 (1H, m), 8.11-8.09 (1H, m),

7.75-7.71 (2H, m), 7.30 (2H, d,  $J = 8.5$  Hz), 6.81 (2H, d,  $J = 8.5$  Hz), 4.11 (2H, s), 3.75 (3H,

s);  $^{13}\text{C}\{^1\text{H}\}$  NMR ( $\text{CDCl}_3$ , DEPT-135, 100 MHz):  $\delta$  182.4 (C, C=O), 178.0 (C, C=O), 158.5

(C), 146.6 (C), 143.3 (C), 134.2 (CH), 133.9 (CH), 131.6 (C), 131.3 (C), 130.3 (2 x CH), 128.6

(C), 127.1 (2 x CH), 114.0 (2 x CH), 55.2 ( $\text{CH}_3$ ), 33.0 ( $\text{CH}_2$ ); HRMS (ESI-TOF)  $m/z$ :  $[\text{M} + \text{H}]^+$

Calcd for  $\text{C}_{18}\text{H}_{14}\text{ClO}_3$  313.0631; Found 313.0631.

**2-Chloro-3-(4-nitrobenzyl)naphthalene-1,4-dione (4k):** Prepared by following the

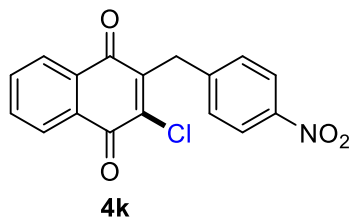

procedure C and purified by column chromatography using

EtOAc/hexane (0.2:9.8 to 0.5:9.5) and isolated as yellow solid.

Yield: 99% (97 mg). MP: 141-143 °C. IR (Neat):  $\nu_{\max}$  2922, 1677,

1521, 1343, 1282, 1102 and 720  $\text{cm}^{-1}$ .  $^1\text{H}$  NMR ( $\text{CDCl}_3$ , 500

MHz):  $\delta$  8.18-8.15 (2H, m), 8.13-8.11 (2H, m), 7.78 (2H, m), 7.53 (2H, d,  $J = 8.5$  Hz), 4.27

(2H, s);  $^{13}\text{C}\{^1\text{H}\}$  NMR ( $\text{CDCl}_3$ , DEPT-135, 125 MHz):  $\delta$  182.2 (C, C=O), 177.5 (C, C=O),

147.0 (C), 144.9 (C), 144.6 (C), 144.2 (C), 134.6 (CH), 134.4 (CH), 131.4 (C), 131.3 (C), 130.0

(2 x CH), 127.4 (CH), 127.3 (CH), 123.9 (2 x CH), 33.8 ( $\text{CH}_2$ ); HRMS (ESI-TOF)  $m/z$ :  $[\text{M} +$

$\text{Na}]^+$  Calcd for  $\text{C}_{17}\text{H}_{10}\text{ClNO}_4\text{Na}$  350.0196; Found 350.0199.

**4-((3-Chloro-1,4-dioxo-1,4-dihydronaphthalen-2-yl)methyl)benzonitrile (4l):** Prepared by

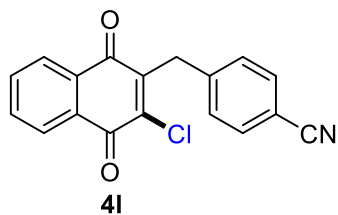

following the procedure C and purified by column chromatography using EtOAc/hexane (0.2:9.8 to 0.5:9.5) and isolated as yellow solid. Yield: 98% (90 mg). MP: 141-143 °C. IR (Neat):  $\nu_{\max}$  2921, 1659, 1591, 1280, 1147, 943, 838 and 707  $\text{cm}^{-1}$

$^1\text{H}$  NMR ( $\text{CDCl}_3$ , 500 MHz):  $\delta$  8.17-8.15 (1H, m), 8.13-8.10 (1H, m), 7.79-7.75 (2H, m), 7.57 (2H, d,  $J = 8.5$  Hz), 7.48 (2H, d,  $J = 8.0$  Hz), 4.22 (2H, s);  $^{13}\text{C}\{^1\text{H}\}$  NMR ( $\text{CDCl}_3$ , DEPT-135, 125 MHz):  $\delta$  182.2 (C, C=O), 177.5 (C, C=O), 145.0 (C), 144.5 (C), 142.2 (C), 134.5 (CH), 134.3 (CH), 132.5 (2 x CH), 131.4 (C), 131.3 (C), 130.0 (2 x CH), 127.4 (CH), 127.3 (CH), 118.7 (C), 111.0 (C), 34.0 ( $\text{CH}_2$ ); HRMS (ESI-TOF)  $m/z$ :  $[\text{M} + \text{Na}]^+$  Calcd for  $\text{C}_{18}\text{H}_{10}\text{ClN O}_2\text{Na}$  330.0298; Found 330.0296.

**2-Chloro-3-(2-(trifluoromethyl)benzyl)naphthalene-1,4-dione (4m):** Prepared by following

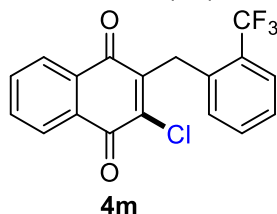

the procedure C and purified by column chromatography using EtOAc/hexane (0.2:9.8 to 0.5:9.5) and isolated as yellow solid. Yield: 99% (104 mg). MP: 144-147 °C. IR (Neat):  $\nu_{\max}$  2969, 1739, 1369, 1212, 1104 and 762  $\text{cm}^{-1}$ ;  $^1\text{H}$  NMR ( $\text{CDCl}_3$ , 500 MHz):  $\delta$  8.23-8.21

(1H, m), 8.14-8.12 (1H, m), 7.81-7.77 (2H, m), 7.71 (1H, d,  $J = 8.0$  Hz), 7.38 (1H, t,  $J = 7.5$  Hz), 7.32 (1H, t,  $J = 7.5$  Hz), 6.98 (1H, d,  $J = 7.5$  Hz), 4.40 (2H, s);  $^{13}\text{C}\{^1\text{H}\}$  NMR ( $\text{CDCl}_3$ , DEPT-135, 125 MHz):  $\delta$  182.0 (C, C=O), 177.6 (C, C=O), 145.8 (C), 145.4 (C), 135.2 (C), 134.5 (CH), 134.2 (CH), 132.0 (CH), 131.5 (C), 131.4 (C), 128.6 (C, q,  $J = 30$  Hz), 128.0 (CH), 127.4 (CH), 127.3 (CH), 126.7 (CH), 126.4 (CH, q,  $J = 5.0$  Hz), 124.4 (C, q,  $J = 272.5$  Hz,  $\text{CF}_3$ ), 30.5 ( $\text{CH}_2$ , br d,  $J = 2.5$  Hz);  $^{19}\text{F}$  NMR ( $\text{CDCl}_3$ , 470 MHz):  $\delta$  -60.8. HRMS (ESI-TOF)  $m/z$ :  $[\text{M} + \text{H}]^+$  Calcd for  $\text{C}_{18}\text{H}_{11}\text{ClF}_3\text{O}_2$  351.0400; Found 351.0405.

**2-Chloro-3-(3-(trifluoromethyl)benzyl)naphthalene-1,4-dione (4n):** Prepared by following

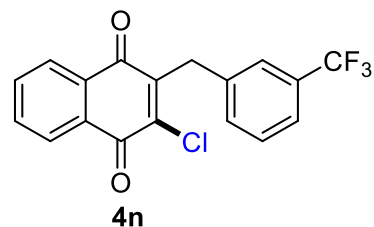

the procedure C and purified by column chromatography using EtOAc/hexane (0.2:9.8 to 0.5:9.5) and isolated as yellow solid. Yield: 95% (84 mg). MP: 149-151 °C. IR (Neat):  $\nu_{\max}$  1657, 1593, 1328, 1282, 1117, 952, 845 and 787  $\text{cm}^{-1}$ .  $^1\text{H}$  NMR

( $\text{CDCl}_3$ , 500 MHz):  $\delta$  8.18-8.14 (1H, m), 8.14-8.10 (1H, m), 7.78-7.73 (2H, m), 7.64 (1H, s), 7.56 (1H, d,  $J = 7.5$  Hz), 7.48 (1H, d,  $J = 7.5$  Hz), 7.40 (1H, t,  $J = 8.0$  Hz), 4.23 (2H, s);  $^{13}\text{C}\{^1\text{H}\}$  NMR ( $\text{CDCl}_3$ , DEPT-135, 125 MHz):  $\delta$  182.2 (C, C=O), 177.7 (C, C=O), 145.5 (C), 144.2 (C), 137.6 (C), 134.4 (CH), 134.2 (CH), 132.6 (CH), 131.5 (C), 131.3 (C), 131.0 (C, q,  $J = 32.5$

Hz), 129.1 (CH), 127.3 (CH), 127.2 (CH), 126.0 (CH, q,  $J = 3.75$  Hz), 124.0 (C, q,  $J = 270$  Hz, CF<sub>3</sub>), 123.8 (CH, q,  $J = 3.75$  Hz), 33.7 (CH<sub>2</sub>); <sup>19</sup>F NMR (CDCl<sub>3</sub>, 470 MHz):  $\delta$  -62.6; HRMS (ESI-TOF)  $m/z$ : [M + Na]<sup>+</sup> Calcd for C<sub>18</sub>H<sub>10</sub>ClF<sub>3</sub>O<sub>2</sub>Na 373.0219; Found 373.0216.

**2-Chloro-3-(4-(trifluoromethyl)benzyl)naphthalene-1,4-dione (4o):** Prepared by following

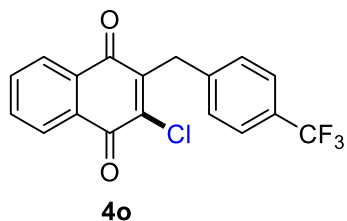

the procedure C and purified by column chromatography using EtOAc/hexane (0.2:9.8 to 0.5:9.5) and isolated as yellow solid.

Yield: 99% (104 mg). MP: 130-132 °C. IR (Neat):  $\nu_{\max}$  2922, 1663, 1588, 1421, 1278, 1038, 839 and 692 cm<sup>-1</sup>. <sup>1</sup>H NMR (CDCl<sub>3</sub>, 500 MHz):  $\delta$  8.17-8.15 (1H, m), 8.12-8.10 (1H, m), 7.78-7.74 (2H, m), 7.53 (2H, d,  $J = 8.0$  Hz), 7.49 (2H, d,  $J = 8.5$  Hz), 4.23 (2H, s); <sup>13</sup>C {<sup>1</sup>H} NMR (CDCl<sub>3</sub>, DEPT-135, 100 MHz):  $\delta$  182.2 (C, C=O), 177.7 (C, C=O), 145.5 (C), 144.2 (C), 140.7 (C), 134.4 (CH), 134.2 (CH), 131.5 (C), 131.3 (C), 129.5 (2 x CH), 129.2 (C, q,  $J = 32$  Hz), 127.3 (CH), 127.2 (CH), 125.6 (2 x CH, q,  $J = 4.0$  Hz), 124.1 (C, q,  $J = 270$  Hz, CF<sub>3</sub>), 33.7 (CH<sub>2</sub>); <sup>19</sup>F NMR (CDCl<sub>3</sub>, 375 MHz):  $\delta$  -62.5; HRMS (ESI-TOF)  $m/z$ : [M + H]<sup>+</sup> Calcd for C<sub>18</sub>H<sub>11</sub>ClF<sub>3</sub>O<sub>2</sub> 351.0400; Found 351.0395.

**2-Chloro-3-(naphthalen-2-ylmethyl)naphthalene-1,4-dione (4p):** Prepared by following the

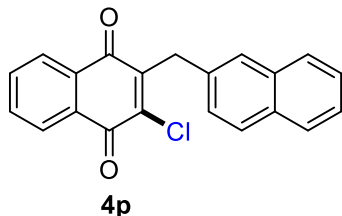

procedure C and purified by column chromatography using EtOAc/hexane (0.2:9.8 to 0.5:9.5) and isolated as yellow solid.

Yield: 99% (59 mg). MP: 149-151 °C. IR (Neat):  $\nu_{\max}$  2932, 1663, 1589, 1277, 1146, 947, 851 and 742 cm<sup>-1</sup>; <sup>1</sup>H NMR (CDCl<sub>3</sub>, 500 MHz):  $\delta$  8.16-8.15 (1H, m), 8.12-8.10 (1H, m), 7.80-7.72 (6H, m), 7.50 (1H, dd,  $J = 8.5, 1.5$  Hz), 7.46-7.40 (2H, m), 4.34 (2H, s); <sup>13</sup>C {<sup>1</sup>H} NMR (CDCl<sub>3</sub>, DEPT-135, 100 MHz):  $\delta$  182.4 (C, C=O), 177.8 (C, C=O), 146.5 (C), 144.0 (C), 134.3 (CH), 134.2 (CH), 133.9 (C), 133.8 (C), 132.6 (C), 132.0 (C), 131.7 (C), 128.4 (CH), 127.8 (CH), 127.7 (CH), 127.6 (CH), 127.4 (CH), 127.2 (2 x CH), 126.1 (CH), 125.7 (CH), 34.2 (CH<sub>2</sub>); HRMS (ESI-TOF)  $m/z$ : [M + H]<sup>+</sup> Calcd for C<sub>21</sub>H<sub>14</sub>O<sub>2</sub>Cl 333.0682; Found 333.0688.

**2-Chloro-3-(thiophen-2-ylmethyl)naphthalene-1,4-dione (4q):** Prepared by following the

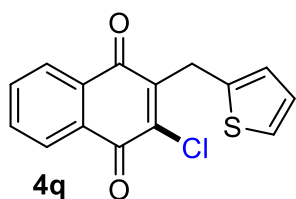

procedure C and purified by column chromatography using EtOAc/hexane (0.2:9.8 to 0.5:9.5) and isolated as yellow solid.

Yield: 97% (84 mg). MP: 100-102 °C. IR (Neat):  $\nu_{\max}$  2922, 1663, 1588, 1276, 1118, 1037, 839 and 694 cm<sup>-1</sup>; <sup>1</sup>H NMR (CDCl<sub>3</sub>, 500 MHz):  $\delta$  8.14 (2H, m), 7.77-7.73 (2H, m), 7.14 (1H, d,  $J = 5.0$  Hz), 7.02 (1H, br d,  $J = 5.0$  Hz),

6.91 (1H, br q,  $J = 5.0$  Hz), 4.35 (2H, s);  $^{13}\text{C}\{^1\text{H}\}$  NMR ( $\text{CDCl}_3$ , DEPT-135, 100 MHz):  $\delta$  182.0 (C, C=O), 177.8 (C, C=O), 145.1 (C), 143.4 (C), 137.6 (C), 134.3 (CH), 134.0 (CH), 131.5 (C), 131.3 (C), 127.2 (CH), 127.1 (CH), 126.8 (2 x CH), 124.7 (CH), 28.2 ( $\text{CH}_2$ ); HRMS (ESI-TOF)  $m/z$ :  $[\text{M} + \text{H}]^+$  Calcd for  $\text{C}_{15}\text{H}_{10}\text{ClO}_2\text{S}$  289.0090; Found 289.0093.

**2-Chloro-3-phenylnaphthalene-1,4-dione (4r):** Prepared by following the procedure C and

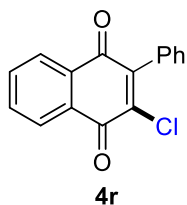

purified by column chromatography using EtOAc/hexane (0.2:9.8 to 0.5:9.5) and isolated as yellow solid. Yield: 98% (79 mg). MP: 102-104 °C. IR (Neat):  $\nu_{\text{max}}$  2923, 1672, 1584, 1492, 1302, 1086, 1019, 816 and 692  $\text{cm}^{-1}$ ;  $^1\text{H}$  NMR ( $\text{CDCl}_3$ , 500 MHz):  $\delta$  8.25-8.21 (1H, m), 8.18-8.15 (1H, m), 7.82-7.78 (2H, m), 7.52-7.46 (3H, m), 7.36 (2H, dd,  $J = 7.5, 1.5$  Hz);  $^{13}\text{C}\{^1\text{H}\}$  NMR ( $\text{CDCl}_3$ , DEPT-135, 125 MHz):  $\delta$  182.1 (C, C=O), 178.2 (C, C=O), 146.0 (C), 143.1 (C), 134.4 (CH), 134.1 (CH), 131.8 (C), 131.7 (C), 131.3 (C), 129.5 (2 x CH), 129.4 (CH), 128.1 (2 x CH), 127.3 (CH), 127.2 (CH); HRMS (ESI-TOF)  $m/z$ :  $[\text{M} + \text{H}]^+$  Calcd for  $\text{C}_{16}\text{H}_{10}\text{ClO}_2$  269.0369; Found 269.0367.

**2-Methylnaphthalene-1,4-dione (4s):** Prepared by following the procedure C and purified by

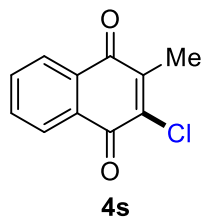

column chromatography using EtOAc/hexane (0.2:9.8 to 0.5:9.5) and isolated as yellow solid. Yield: 97% (60 mg). MP: 92-94 °C. IR (Neat):  $\nu_{\text{max}}$  2923, 1670, 1587, 1279, 1028, 845 and 701  $\text{cm}^{-1}$ .  $^1\text{H}$  NMR ( $\text{CDCl}_3$ , 500 MHz):  $\delta$  8.16-8.13 (1H, m), 8.12-8.10 (1H, m), 7.76-7.72 (2H, m), 2.34 (3H, s);  $^{13}\text{C}\{^1\text{H}\}$  NMR ( $\text{CDCl}_3$ , DEPT-135, 125 MHz):  $\delta$  182.6 (C, C=O), 177.5 (C, C=O), 144.8 (C), 143.3 (C), 134.1 (CH), 133.9 (CH), 131.7 (C), 131.4 (C), 127.1 (CH), 127.0 (CH), 14.4 ( $\text{CH}_3$ ); HRMS (ESI-TOF)  $m/z$ :  $[\text{M} + \text{Na}]^+$  Calcd for  $\text{C}_{11}\text{H}_7\text{ClO}_2\text{Na}$  229.0032; Found 229.0032.

**2-Chloro-3-ethylnaphthalene-1,4-dione (4t):** Prepared by following the procedure C and

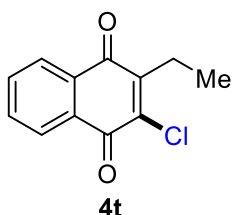

purified by column chromatography using EtOAc/hexane (0.2:9.8 to 0.5:9.5) and isolated as yellow solid. Yield: 99% (65.5 mg). MP: 95-97 °C. IR (Neat):  $\nu_{\text{max}}$  2927, 1656, 1588, 1453, 1327, 1276, 1176, 1053, 829 and 711  $\text{cm}^{-1}$ .  $^1\text{H}$  NMR ( $\text{CDCl}_3$ , 500 MHz):  $\delta$  8.17-8.14 (1H, m), 8.14-8.11 (1H, m), 7.77-7.72 (2H, m), 2.84 (2H, q,  $J = 7.5$  Hz), 1.91 (3H, t,  $J = 7.5$  Hz);  $^{13}\text{C}\{^1\text{H}\}$  NMR ( $\text{CDCl}_3$ , DEPT-135, 125 MHz):  $\delta$  182.2 (C, C=O), 177.9 (C, C=O), 149.6 (C), 142.8 (C), 134.2 (CH), 133.9 (CH), 131.8 (C), 131.4 (C), 127.1 (CH), 127.0 (CH), 22.0 ( $\text{CH}_2$ ), 12.0 ( $\text{CH}_3$ ); HRMS (ESI-TOF)  $m/z$ :  $[\text{M} + \text{H}]^+$  Calcd for  $\text{C}_{12}\text{H}_{10}\text{ClO}_2$  221.0369; Found 221.0369.

**2-Chloro-3-isobutylnaphthalene-1,4-dione (4u):** Prepared by following the procedure C and

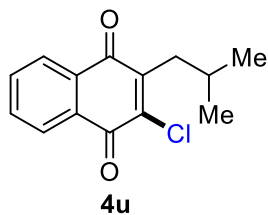

purified by column chromatography using EtOAc/hexane (0.2:9.8 to 0.5:9.5) and isolated as yellow solid. Yield: 98% (73 mg). MP: 96-98 °C. IR (Neat):  $\nu_{\max}$  2955, 1658, 1589, 1276, 1163, 1079, 840 and 711  $\text{cm}^{-1}$ .  $^1\text{H}$  NMR ( $\text{CDCl}_3$ , 500 MHz):  $\delta$  8.16-8.14 (1H, m), 8.12-8.10 (1H, m), 7.77-7.72 (2H, m), 2.73 (2H, d,  $J = 7.5$  Hz), 2.07 (1H, septet,  $J = 7.0$  Hz), 0.98 (6H, d,  $J = 6.5$  Hz);  $^{13}\text{C}$  { $^1\text{H}$ } NMR ( $\text{CDCl}_3$ , DEPT-135, 125 MHz):  $\delta$  182.6 (C, C=O), 177.8 (C, C=O), 148.0 (C), 143.7 (C), 134.1 (CH), 133.8 (CH), 131.7 (C), 131.4 (C), 127.1 (2 x CH), 37.0 ( $\text{CH}_2$ ), 28.4 (CH), 22.8 (2 x  $\text{CH}_3$ ); HRMS (ESI-TOF)  $m/z$ :  $[\text{M} + \text{H}]^+$  Calcd for  $\text{C}_{14}\text{H}_{14}\text{ClO}_2$  249.0682; Found 249.0684.

**2-Chloro-3-pentylnaphthalene-1,4-dione (4v):** Prepared by following the procedure C and

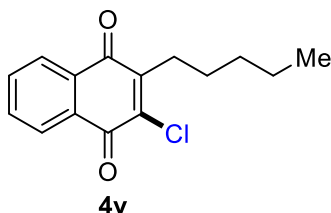

purified by column chromatography using EtOAc/hexane (0.2:9.8 to 0.5:9.5) and isolated as yellow solid. Yield: 95% (75 mg). MP: 134-136 °C. IR (Neat):  $\nu_{\max}$  2957, 1657, 1589, 1457, 1328, 1275, 1106, 836 and 710  $\text{cm}^{-1}$ ;  $^1\text{H}$  NMR ( $\text{CDCl}_3$ , 500 MHz):  $\delta$  8.16-8.14 (1H, m), 8.13-8.11 (1H, m), 7.77-7.72 (2H, m), 2.80 (2H, t,  $J = 7.5$  Hz), 1.57-1.53 (2H, m), 1.44-1.33 (4H, m), 0.91 (3H, t,  $J = 7.5$  Hz);  $^{13}\text{C}$  { $^1\text{H}$ } NMR ( $\text{CDCl}_3$ , DEPT-135, 100 MHz):  $\delta$  182.4 (C, C=O), 177.9 (C, C=O), 148.7 (C), 143.0 (C), 134.1 (CH), 133.8 (CH), 131.8 (C), 131.4 (C), 127.1 (CH), 127.0 (CH), 31.9 ( $\text{CH}_2$ ), 28.5 ( $\text{CH}_2$ ), 27.5 ( $\text{CH}_2$ ), 22.4 ( $\text{CH}_2$ ), 13.9 ( $\text{CH}_3$ ); HRMS (ESI-TOF)  $m/z$ :  $[\text{M} + \text{H}]^+$  Calcd for  $\text{C}_{15}\text{H}_{16}\text{ClO}_2$  263.0839; Found 263.0838.

**2-Chloro-3-isopentylnaphthalene-1,4-dione (4w):** Prepared by following the procedure C

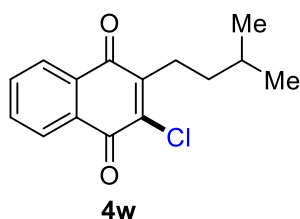

and purified by column chromatography using EtOAc/hexane (0.2:9.8 to 0.5:9.5) and isolated as yellow solid. Yield: 91% (72 mg). MP: 137-139 °C. IR (Neat):  $\nu_{\max}$  2957, 1658, 1590, 1325, 1275, 1172, 1082, 847 and 711  $\text{cm}^{-1}$ .  $^1\text{H}$  NMR ( $\text{CDCl}_3$ , 500 MHz):  $\delta$  8.17-8.13 (1H, m), 8.13-8.09 (1H, m), 7.77-7.72 (2H, m), 2.81-2.78 (2H, m), 1.69 (1H, septet,  $J = 6.5$  Hz), 1.44-1.39 (2H, m), 0.98 (6H, d,  $J = 6.5$  Hz);  $^{13}\text{C}$  { $^1\text{H}$ } NMR ( $\text{CDCl}_3$ , DEPT-135, 125 MHz):  $\delta$  182.4 (C, C=O), 177.8 (C, C=O), 149.0 (C), 142.8 (C), 134.1 (CH), 133.8 (CH), 131.8 (C), 131.4 (C), 127.1 (CH), 127.0 (CH), 36.6 ( $\text{CH}_2$ ), 28.6 (CH), 26.6 ( $\text{CH}_2$ ), 22.3 (2 x  $\text{CH}_3$ ); HRMS (ESI-TOF)  $m/z$ :  $[\text{M} + \text{H}]^+$  Calcd for  $\text{C}_{15}\text{H}_{16}\text{ClO}_2$  263.0839; Found 263.0834.

**2-Chloro-3-isopropynaphthalene-1,4-dione (4x):** Prepared by following the procedure C

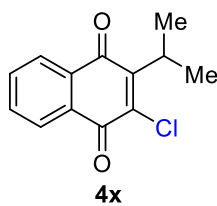

and purified by column chromatography using EtOAc/hexane (0.2:9.8 to 0.5:9.5) and isolated as yellow solid. Yield: 95% (67 mg). MP: 149-151 °C. IR (Neat):  $\nu_{\max}$  2961, 1657, 1565, 1278, 1061, 812 and 713  $\text{cm}^{-1}$ .  $^1\text{H}$  NMR ( $\text{CDCl}_3$ , 500 MHz):  $\delta$  8.13-8.11 (1H, m), 8.09-8.07 (1H, m), 7.76-7.70 (2H, m), 3.60 (1H, septet,  $J = 7.0$  Hz), 1.39 (6H, d,  $J = 7.0$  Hz);  $^{13}\text{C}\{^1\text{H}\}$  NMR ( $\text{CDCl}_3$ , DEPT-135, 125 MHz):  $\delta$  182.5 (C, C=O), 178.0 (C, C=O), 151.9 (C), 142.6 (C), 134.1 (CH), 133.6 (CH), 132.4 (C), 131.0 (C), 126.9 (2 x CH), 30.6 (CH), 19.7 (2 x  $\text{CH}_3$ ); HRMS (ESI-TOF)  $m/z$ :  $[\text{M} + \text{H}]^+$  Calcd for  $\text{C}_{13}\text{H}_{12}\text{ClO}_2$  235.0526; Found 235.0530.

**(S)-2-Chloro-3-(4-nitro-3-phenylbutyl)naphthalene-1,4-dione (4y):** Prepared by following

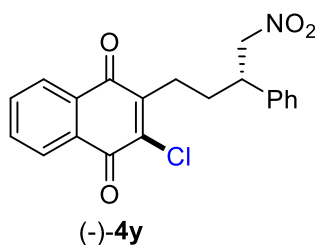

the procedure C and purified by column chromatography using EtOAc/hexane (0.2:9.8 to 0.5:9.5) and isolated as red solid. Yield: 91% (101 mg). MP: 144-146 °C.  $[\alpha]_{\text{D}}^{25} = -32.0^\circ$  [ $c = 0.1$ ,  $\text{CHCl}_3$ ]. IR (Neat):  $\nu_{\max}$  2925, 1670, 1548, 1377, 1280, 838 and 702  $\text{cm}^{-1}$ .  $^1\text{H}$  NMR ( $\text{CDCl}_3$ , 500 MHz):  $\delta$  8.12-8.10 (1H, m), 8.09-8.06 (1H, m), 7.77-7.72 (2H, m), 7.32-7.29 (2H, m), 7.26-7.20 (3H, m), 4.62-4.53 (2H, m), 3.62-3.56 (1H, m), 2.79-2.73 (1H, m), 2.72-2.66 (1H, m), 2.10-2.02 (1H, m), 1.99-1.92 (1H, m);  $^{13}\text{C}\{^1\text{H}\}$  NMR ( $\text{CDCl}_3$ , DEPT-135, 100 MHz):  $\delta$  182.2 (C, C=O), 177.4 (C, C=O), 147.1 (C), 143.4 (C), 138.2 (C), 134.2 (CH), 134.0 (CH), 131.6 (C), 131.2 (C), 129.1 (2 x CH), 128.0 (CH), 127.6 (2 x CH), 127.2 (CH), 127.0 (CH), 80.8 ( $\text{CH}_2$ ), 44.5 (CH), 30.2 ( $\text{CH}_2$ ), 26.4 ( $\text{CH}_2$ ); HRMS (ESI-TOF)  $m/z$ :  $[\text{M} + \text{H}]^+$  Calcd for  $\text{C}_{20}\text{H}_{17}\text{ClNO}_4$  370.0846; Found 370.0848.

**Dimethyl-(R)-2-(3-(3-chloro-1,4-dioxo-1,4-dihydronaphthalen-2-yl)-1-**

**phenylpropyl)malonate (4z):** Prepared by following the procedure C and purified by column

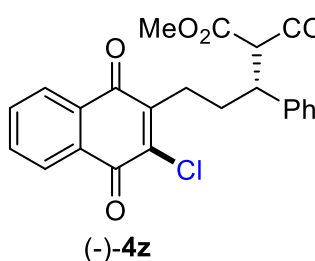

chromatography using EtOAc/hexane (0.4:9.6 to 0.8:9.2) and isolated as yellow solid. Yield: 91% (120 mg). MP: 140-142 °C.  $[\alpha]_{\text{D}}^{25} = -68^\circ$  [ $c = 0.1$ ,  $\text{CHCl}_3$ ]. IR (Neat):  $\nu_{\max}$  2951, 1733, 1669, 1594, 1453, 1279, 1143, 840 and 699  $\text{cm}^{-1}$ .  $^1\text{H}$  NMR ( $\text{CDCl}_3$ , 500 MHz):  $\delta$  8.08-8.07 (1H, m), 8.05-8.03 (1H, m), 7.73-7.68 (2H, m), 7.24 (4H, d,  $J = 4.5$  Hz), 7.17-7.12 (1H, m), 3.74 (3H, s), 3.64 (1H, d,  $J = 10.5$  Hz), 3.49 (1H, dt,  $J = 10.5, 3.5$  Hz), 3.43 (3H, s), 2.69-2.64 (1H, m), 2.60-2.54 (1H, m), 2.06-1.99 (1H, m), 1.98-1.91 (1H, m);  $^{13}\text{C}\{^1\text{H}\}$  NMR ( $\text{CDCl}_3$ , DEPT-135, 125 MHz):  $\delta$  182.0 (C, C=O), 177.5 (C, C=O), 168.4 (C, C=O), 167.9 (C, C=O), 147.6 (C), 143.1 (C), 139.5 (C),



134.0 (CH), 133.8 (CH), 131.6 (C), 131.2 (C), 128.5 (2 x CH), 128.3 (2 x CH), 127.4 (CH), 127.0 (CH), 126.9 (CH), 58.6 (CH), 52.6 (CH<sub>3</sub>), 52.2 (CH<sub>3</sub>), 45.7 (CH), 31.0 (CH<sub>2</sub>), 26.8 (CH<sub>2</sub>); HRMS (ESI-TOF) *m/z*: [M + NH<sub>4</sub>]<sup>+</sup> Calcd for C<sub>24</sub>H<sub>25</sub>ClNO<sub>6</sub> 458.1370; Found 458.1367.

**3-Benzyl-2-chloro-6-methoxynaphthalene-1,4-dione (4aa):** Prepared by following the

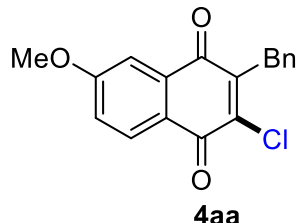

procedure C and purified by column chromatography using EtOAc/hexane (0.2:9.8 to 0.5:9.5) and isolated as yellow solid. Yield:

89% (84 mg). MP: 140-142 °C. IR (Neat):  $\nu_{\max}$  2968, 1738, 1672, 1583, 1454, 1352, 1228, 1071, 816 and 692 cm<sup>-1</sup>. <sup>1</sup>H NMR (CDCl<sub>3</sub>,

500 MHz):  $\delta$  8.05 (1H, d, *J* = 8.5 Hz), 7.50 (1H, d, *J* = 3.0 Hz), 7.33

(2H, d, *J* = 7.5 Hz), 7.25 (2H, t, *J* = 7.5 Hz), 7.19-7.14 (2H, m), 4.13 (2H, s), 3.91 (3H, s);

<sup>13</sup>C{<sup>1</sup>H} NMR (CDCl<sub>3</sub>, DEPT-135, 100 MHz):  $\delta$  182.5 (C, C=O), 176.9 (C, C=O), 164.4 (C),

145.9 (C), 144.1 (C), 136.8 (C), 133.7 (C), 129.7 (CH), 129.1 (2 x CH), 128.6 (2 x CH), 126.8

(CH), 124.7 (C), 120.5 (CH), 110.5 (CH), 55.9 (CH<sub>3</sub>), 33.9 (CH<sub>2</sub>); HRMS (ESI-TOF) *m/z*: [M

+ H]<sup>+</sup> Calcd for C<sub>18</sub>H<sub>14</sub>ClO<sub>3</sub> 313.0631; Found 313.0636.

**2-Benzyl-3,6-dichloronaphthalene-1,4-dione (4bb):** Prepared by following the procedure C

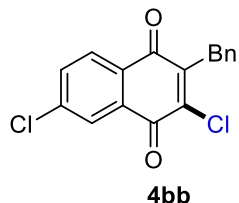

and purified by column chromatography using EtOAc/hexane (0.2:9.8 to 0.5:9.5) and isolated as yellow solid. Yield: 99% (94 mg). MP: 145-147

°C. IR (Neat):  $\nu_{\max}$  2921, 1671, 1585, 1276, 1151, 952 and 729 cm<sup>-1</sup>. <sup>1</sup>H

NMR (CDCl<sub>3</sub>, 500 MHz):  $\delta$  8.10 (1H, br s), 8.05 (1H, dd, *J* = 8.0, 0.5 Hz),

7.70 (1H, qd, *J* = 7.0, 1.0 Hz), 7.36 (2H, d, *J* = 7.5 Hz), 7.28 (2H, t, *J* = 7.0 Hz), 7.21 (1H, t, *J*

= 8.0 Hz), 4.17 (2H, s); <sup>13</sup>C{<sup>1</sup>H} NMR (CDCl<sub>3</sub>, DEPT-135, 125 MHz):  $\delta$  181.4 (C, C=O), 177.0

(C, C=O), 146.7 (C), 143.5 (C), 141.1 (C), 136.4 (C), 134.3 (CH), 132.4 (C), 129.8 (C), 129.2

(2 x CH), 128.8 (CH), 128.7 (2 x CH), 127.1 (CH), 127.0 (CH), 33.9 (CH<sub>2</sub>); HRMS (ESI-TOF)

*m/z*: [M + H]<sup>+</sup> Calcd for C<sub>17</sub>H<sub>11</sub>Cl<sub>2</sub>O<sub>2</sub> 317.0136; Found 317.0133.

**2-Chloronaphthalene-1,4-dione (4cc):** Prepared by following the procedure C and purified

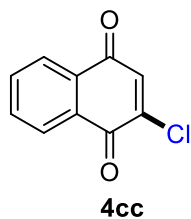

by column chromatography using EtOAc/hexane (0.2:9.8 to 0.5:9.5) and isolated as yellow solid. Yield: 97% (60 mg). MP: 125-130 °C. IR (Neat):  $\nu_{\max}$

3047, 1738, 1660, 1573, 1367, 1294, 1216, 1117, 857 and 779 cm<sup>-1</sup>. <sup>1</sup>H NMR

(CDCl<sub>3</sub>, 500 MHz):  $\delta$  8.19-8.15 (1H, m), 8.11-8.07 (1H, m), 7.81-7.76 (2H,

m), 7.22 (1H, s); <sup>13</sup>C{<sup>1</sup>H} NMR (CDCl<sub>3</sub>, DEPT-135, 125 MHz):  $\delta$  182.6 (C, C=O), 177.9 (C,

C=O), 146.3 (C), 135.9 (CH), 134.5 (CH), 134.1 (CH), 131.7 (C), 131.3 (C), 127.5 (CH), 126.7

(CH); HRMS (ESI-TOF) *m/z*: [M + H]<sup>+</sup> Calcd for C<sub>10</sub>H<sub>6</sub>ClO<sub>2</sub> 193.0056; Found 193.0049.

**3-Hydroxy-8,8-dimethyl-5,6,7,8-tetrahydrophenanthrene-1,4-dione (7):** Prepared by

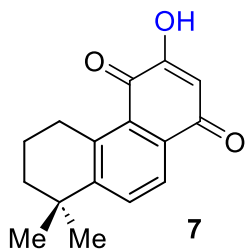

following the procedure **G** and purified by column chromatography using EtOAc/hexane (0.6:9.4 to 0.8:9.2) and isolated as yellow solid.

Yield: 31% (200 mg). MP: 161-163 °C. IR (Neat):  $\nu_{\max}$  3361, 2924, 1650, 1566, 1374, 1204 and 845  $\text{cm}^{-1}$ .  $^1\text{H}$  NMR ( $\text{CDCl}_3$ , 500 MHz):  $\delta$  8.00 (1H, d,  $J = 8.5$  Hz), 7.78 (1H, d,  $J = 8.0$  Hz), 7.65 (1H, s, OH), 6.27 (1H, s, olefinic-H), 3.27 (2H, t,  $J = 6.5$  Hz), 1.88-1.83 (2H, m), 1.70-1.68 (2H, m), 1.33 (6H, s, 2 x  $\text{CH}_3$ );  $^{13}\text{C}\{^1\text{H}\}$  NMR ( $\text{CDCl}_3$ , DEPT-135, 125 MHz):  $\delta$  185.1 (C, C=O), 183.4 (C, C=O), 156.8 (C), 153.1 (C), 141.4 (C), 133.8 (CH), 132.6 (C), 126.6 (C), 124.8 (CH), 108.3 (CH), 37.7 ( $\text{CH}_2$ ), 34.9 (C), 31.8 (2 x  $\text{CH}_3$ ), 30.0 ( $\text{CH}_2$ ), 19.1 ( $\text{CH}_2$ ); HRMS (ESI-TOF)  $m/z$ :  $[\text{M} + \text{H}]^+$  Calcd for  $\text{C}_{16}\text{H}_{17}\text{O}_3$  257.1178; Found 257.1178.

**3-Hydroxy-2-isopropyl-8,8-dimethyl-5,6,7,8-tetrahydrophenanthrene-1,4-dione**

**[Deoxyneocryptotanshinone 8]:** Prepared by following the procedure **H** and purified by

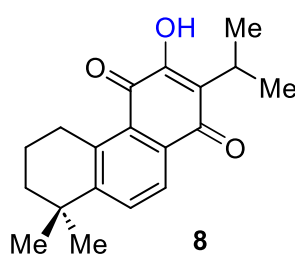

column chromatography using EtOAc/hexane (0.2:9.8 to 0.5:9.5) and isolated as yellow solid. Yield: 45% (27 mg). MP: 110-112 °C.

IR (Neat):  $\nu_{\max}$  3346, 2929, 1642, 1564, 1377, 1288, 1198, 985 and 797  $\text{cm}^{-1}$ .  $^1\text{H}$  NMR ( $\text{CDCl}_3$ , 500 MHz):  $\delta$  8.00 (1H, d,  $J = 8.0$  Hz), 7.73 (1H, d,  $J = 8.0$  Hz, and 1H, s, OH), 3.36 (1H, septet,  $J = 7.0$  Hz), 3.26 (2H, t,  $J = 6.5$  Hz), 1.86-1.81 (2H, m), 1.68-1.66 (2H, m), 1.32 (6H, s, 2 x  $\text{CH}_3$ ), 1.29 (6H, d,  $J = 7.0$  Hz);  $^{13}\text{C}\{^1\text{H}\}$  NMR ( $\text{CDCl}_3$ , DEPT-135, 125 MHz):  $\delta$  184.6 (C, C=O), 183.4 (C, C=O), 153.2 (C), 152.5 (C), 140.6 (C), 133.3 (CH), 132.7 (C), 126.4 (C), 126.1 (C), 125.0 (CH), 37.7 ( $\text{CH}_2$ ), 34.8 (C), 31.8 (2 x  $\text{CH}_3$ ), 29.9 ( $\text{CH}_2$ ), 24.4 (CH), 19.8 (2 x  $\text{CH}_3$ ), 19.1 ( $\text{CH}_2$ ); HRMS (ESI-TOF)  $m/z$ :  $[\text{M} + \text{H}]^+$  Calcd for  $\text{C}_{19}\text{H}_{23}\text{O}_3$  299.1647; Found 299.1649.

**2-Isopropyl-8,8-dimethyl-5,6,7,8-tetrahydrophenanthrene-3,4-dione [Miltirone 9]:**

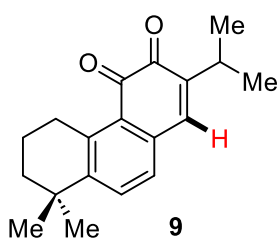

Prepared by following the procedure **I** and purified by column chromatography using EtOAc/hexane (0.2:9.8 to 0.5:9.5) and isolated as orange solid. Yield: 53% (30 mg). MP: 99-101 °C. IR (Neat):  $\nu_{\max}$

2923, 1655, 1460, 1260, 1173, 941 and 808  $\text{cm}^{-1}$ .  $^1\text{H}$  NMR ( $\text{CDCl}_3$ , 500 MHz):  $\delta$  7.59 (1H, d,  $J = 8.0$  Hz), 7.10 (1H, d,  $J = 8.0$  Hz), 7.07 (1H, s, olefinic-H), 3.18 (2H, t,  $J = 6.5$  Hz), 3.02 (1H, septet,  $J = 7.0$  Hz), 1.82-1.77 (2H, m), 1.66-1.64 (2H, m), 1.30 (6H, s, 2 x  $\text{CH}_3$ ), 1.16 (6H, d,  $J = 7.0$  Hz);  $^{13}\text{C}\{^1\text{H}\}$  NMR ( $\text{CDCl}_3$ , DEPT-135, 125 MHz):  $\delta$  182.4 (C, C=O), 181.6 (C, C=O), 149.7 (C), 145.1 (C), 144.5 (C),



139.8 (CH), 134.4 (C), 133.7 (CH), 128.3 (C), 127.8 (CH), 37.9 (CH<sub>2</sub>), 34.5 (C), 31.8 (2 x CH<sub>3</sub>), 29.8 (CH<sub>2</sub>), 26.9 (CH), 21.5 (2 x CH<sub>3</sub>), 19.1 (CH<sub>2</sub>); HRMS (ESI-TOF) *m/z*: [M + H]<sup>+</sup> Calcd for C<sub>19</sub>H<sub>23</sub>O<sub>2</sub> 283.1698; Found 283.1697.

**2-Ethyl-3-hydroxy-8,8-dimethyl-5,6,7,8-tetrahydrophenanthrene-1,4-dione (11):** Prepared

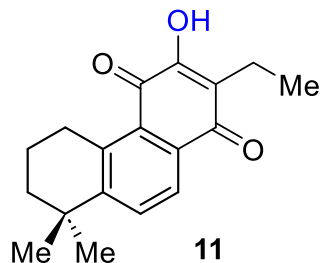

by following the procedure **J** and purified by column chromatography using EtOAc/hexane (0.2:9.8 to 0.5:9.5) and isolated as orange semi-solid. Yield: 62% (34 mg). IR (Neat):  $\nu_{\max}$  3359, 2930, 1643, 1564, 1377, 1329, 1263, 1195, 1097, 980 and 755 cm<sup>-1</sup>. <sup>1</sup>H NMR (CDCl<sub>3</sub>, 500 MHz):  $\delta$  8.00 (1H, d, *J* = 8.5 Hz), 7.73 (1H, d, *J* = 8.5 Hz), 7.62 (1H, s, OH), 3.26 (2H, t, *J* = 6.5 Hz), 2.59-2.55 (2H, m), 1.85-1.80 (2H, m), 1.68-1.66 (2H, m), 1.31 (6H, s), 1.12 (3H, t, *J* = 7.5 Hz); <sup>13</sup>C {<sup>1</sup>H} NMR (CDCl<sub>3</sub>, DEPT-135, 125 MHz):  $\delta$  184.7 (C, C=O), 183.1 (C, C=O), 153.2 (C), 152.7 (C), 140.8 (C), 133.2 (CH), 132.5 (C), 126.5 (C), 124.8 (CH), 123.2 (C), 37.7 (CH<sub>2</sub>), 34.8 (C), 31.8 (2 x CH<sub>3</sub>), 29.9 (CH<sub>2</sub>), 19.1 (CH<sub>2</sub>), 16.5 (CH<sub>2</sub>), 12.6 (CH<sub>3</sub>); HRMS (ESI-TOF) *m/z*: [M + H]<sup>+</sup> Calcd for C<sub>18</sub>H<sub>21</sub>O<sub>3</sub> 285.1491; Found 285.1491.

**2-Ethyl-8,8-dimethyl-5,6,7,8-tetrahydrophenanthrene-3,4-dione (12):** Prepared by

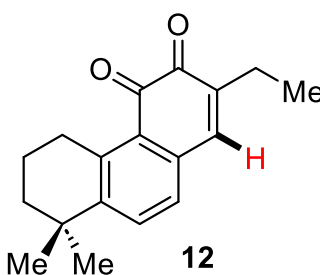

following the procedure **K** and purified by column chromatography using EtOAc/hexane (0.2:9.8 to 0.5:9.5) and isolated as orange semi-solid. Yield: 68% (20 mg). IR (Neat):  $\nu_{\max}$  2927, 1656, 1457, 1259, 1143 and 905 cm<sup>-1</sup>. <sup>1</sup>H NMR (CDCl<sub>3</sub>, 500 MHz):  $\delta$  7.58 (1H, d, *J* = 8.0 Hz), 7.08 (2H, d, *J* = 7.5 Hz), 3.17 (2H, t, *J* = 6.5 Hz), 2.46-2.41 (2H, m), 1.82-1.77 (2H, m), 1.66-1.63 (2H, m), 1.29 (6H, s), 1.15 (3H, t, *J* = 7.5 Hz); <sup>13</sup>C {<sup>1</sup>H} NMR (CDCl<sub>3</sub>, DEPT-135, 125 MHz):  $\delta$  182.2 (C, C=O), 181.8 (C, C=O), 149.6 (C), 144.6 (C), 141.4 (CH), 140.6 (C), 134.4 (C), 133.7 (CH), 128.3 (C), 127.7 (CH), 37.8 (CH<sub>2</sub>), 34.5 (C), 31.7 (2 x CH<sub>3</sub>), 29.9 (CH<sub>2</sub>), 22.0 (CH<sub>2</sub>), 19.0 (CH<sub>2</sub>), 12.4 (CH<sub>3</sub>); HRMS (ESI-TOF) *m/z*: [M + H]<sup>+</sup> Calcd for C<sub>18</sub>H<sub>21</sub>O<sub>2</sub> 269.1542; Found 269.1541.

**2-Hydroxy-3-(4-iodobenzyl)naphthalene-1,4-dione (1g):** Prepared by following the

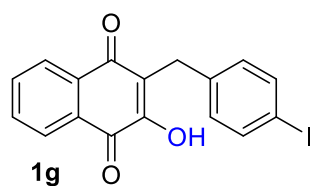

procedure **D** and purified by column chromatography using EtOAc/hexane (0.2:9.8 to 0.5:9.5) and isolated as yellow solid. Yield: 90% (105 mg). MP: 193-195 °C. IR (Neat):  $\nu_{\max}$  3379, 1633, 1592, 1365, 1274, 1226, 1043 and 726 cm<sup>-1</sup>. <sup>1</sup>H NMR (CDCl<sub>3</sub>, 500 MHz):  $\delta$  8.10 (1H, dd, *J* = 7.5, 1.0 Hz), 8.07 (1H, d, *J* = 7.5, 1.0 Hz), 7.75 (1H, dt, *J* = 7.5, 1.0

Hz), 7.67 (1H, dt,  $J = 7.5, 1.0$  Hz), 7.57 (2H, br d,  $J = 7.5$  Hz), 7.14 (2H, br d,  $J = 7.5$  Hz), 3.87 (2H, s);  $^{13}\text{C}\{^1\text{H}\}$  NMR ( $\text{CDCl}_3$ , DEPT-135, 100 MHz):  $\delta$  184.2 (C, C=O), 181.5 (C, C=O), 153.1 (C), 138.5 (C), 137.5 (2 x CH), 135.1 (CH), 133.1 (CH), 132.7 (C), 131.3 (2 x CH), 129.3 (C), 126.9 (CH), 126.2 (CH), 122.4 (C), 91.6 (C), 28.6 ( $\text{CH}_2$ ); HRMS (ESI-TOF)  $m/z$ :  $[\text{M} + \text{H}]^+$  Calcd for  $\text{C}_{17}\text{H}_{12}\text{O}_3$  390.9831; Found 390.9833.

**2-Hydroxy-3-isopropynaphthalene-1,4-dione (1x):** Prepared by following the procedure **F**

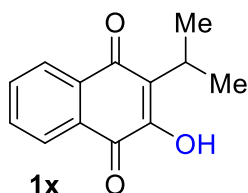

and purified by column chromatography using EtOAc/hexane (0.2:9.8 to 0.5:9.5) and isolated as yellow solid. Yield: 40% (26 mg). MP: 101-103 °C. IR (Neat):  $\nu_{\text{max}}$  3367, 2923, 1644, 1586, 1359, 1259, 1009, 793 and 662  $\text{cm}^{-1}$ .  $^1\text{H}$  NMR ( $\text{CDCl}_3$ , 500 MHz):  $\delta$  8.11 (1H, dd,  $J = 7.5$  Hz, 1.0 Hz), 8.06 (1H, dd,  $J = 7.5, 1.0$  Hz), 7.74 (1H, dt,  $J = 7.5, 1.5$  Hz), 7.66 (1H, dt,  $J = 7.5, 1.0$  Hz), 7.42 (1H, s, OH), 3.42 (1H, septet,  $J = 7.0$  Hz), 1.31 (6H, d,  $J = 7.0$  Hz);  $^{13}\text{C}\{^1\text{H}\}$  NMR ( $\text{CDCl}_3$ , DEPT-135, 100 MHz):  $\delta$  184.4 (C, C=O), 181.9 (C, C=O), 152.7 (C), 134.9 (CH), 133.2 (C), 132.7 (CH), 129.2 (C), 128.8 (C), 126.9 (CH), 125.9 (CH), 24.6 (CH), 19.8 (2 x  $\text{CH}_3$ ); HRMS (ESI-TOF)  $m/z$ :  $[\text{M} + \text{H}]^+$  Calcd for  $\text{C}_{13}\text{H}_{13}\text{O}_3$  217.0865; Found 217.0868.

**(S)-2-Hydroxy-3-(4-nitro-3-phenylbutyl)naphthalene-1,4-dione (1y):** Prepared by

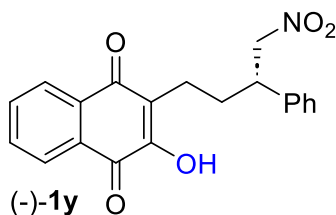

following the procedure **D** and purified by column chromatography using EtOAc/hexane (2.0:8.0 to 3.0:7.0) and isolated as yellow solid. Yield: 95% (100 mg). MP: 130-132 °C.  $[\alpha]_{\text{D}}^{25} = -19.5^\circ$  [ $c = 0.1, \text{CHCl}_3$ ]; IR (Neat):  $\nu_{\text{max}}$  3338, 1640, 1544, 1371, 1272, 1214, 1004 and 728  $\text{cm}^{-1}$ ;  $^1\text{H}$  NMR ( $\text{CDCl}_3$ , 500 MHz):  $\delta$  8.08 (1H, dd,  $J = 7.5, 1.0$  Hz), 8.05 (1H, dd,  $J = 7.5, 1.0$  Hz), 7.75 (1H, dt,  $J = 7.5, 1.0$  Hz), 7.67 (1H, dt,  $J = 7.5, 1.5$  Hz), 7.32-7.28 (3H, m), 7.25-7.18 (3H, m), 4.65-4.61 (1H, m), 4.57-4.53 (1H, m), 3.57-3.51 (1H, m), 2.60-2.49 (2H, m), 2.10-2.02 (1H, m), 1.97-1.90 (1H, m);  $^{13}\text{C}\{^1\text{H}\}$  NMR ( $\text{CDCl}_3$ , DEPT-135, 100 MHz):  $\delta$  184.5 (C, C=O), 181.1 (C, C=O), 153.1 (C), 138.9 (C), 135.0 (CH), 133.0 (CH), 132.8 (C), 129.3 (C), 128.9 (2 x CH), 127.8 (CH), 127.6 (2 x CH), 126.8 (CH), 126.2 (CH), 122.9 (C), 80.9 ( $\text{CH}_2$ ), 44.4 (CH), 30.8 ( $\text{CH}_2$ ), 21.2 ( $\text{CH}_2$ ); HRMS (ESI-TOF)  $m/z$ :  $[\text{M} + \text{Na}]^+$  Calcd for  $\text{C}_{20}\text{H}_{17}\text{NO}_5\text{Na}$  374.1004; Found 374.1009.

**Diethyl**

**(R)-2-(3-(3-hydroxy-1,4-dioxo-1,4-dihydronaphthalen-2-yl)-1-phenylpropyl)malonate (1z):** Prepared by following the procedure **D** and purified by column

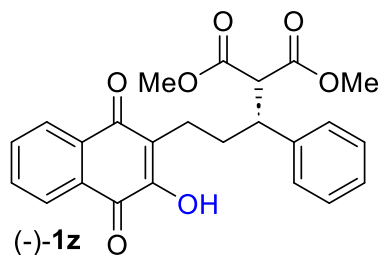

chromatography using EtOAc/hexane (2.0:8.0 to 3.0:7.0) and isolated as yellow solid. Yield: 95% (120 mg). MP: 140-142 °C.  $[\alpha]_D^{25} = -68^\circ$  [ $c = 0.1$ ,  $\text{CHCl}_3$ ]; IR (Neat):  $\nu_{\text{max}}$  2921, 1735, 1264, 1147, 1020, 735  $\text{cm}^{-1}$ ;  $^1\text{H}$  NMR ( $\text{CDCl}_3$ , 500 MHz):  $\delta$  8.07 (1H, d,  $J = 7.5$  Hz), 8.03 (1H, d,  $J = 7.5$  Hz), 7.73 (1H, t,  $J = 7.5$  Hz), 7.66 (1H, m,  $J = 7.5$  Hz), 7.30-7.23 (4H, m), 7.19-7.15 (2H, m), 3.74 (3H, s), 3.66 (1H, d,  $J = 10.5$  Hz), 3.47-3.45 (1H, m), 3.43 (3H, s), 2.52-2.46 (1H, m), 2.42-2.37 (1H, m), 2.08-2.00 (1H, m), 1.96-1.90 (1H, m);  $^{13}\text{C}\{^1\text{H}\}$  NMR ( $\text{CDCl}_3$ , DEPT-135, 125 MHz):  $\delta$  184.3 (C, C=O), 181.2 (C, C=O), 168.4 (C, O-C=O), 168.1 (C, O-C=O), 152.9 (C), 146.8 (C), 140.1 (C), 134.8 (CH), 132.9 (C), 132.8 (CH), 128.3 (4 x CH), 127.1 (CH), 126.6 (CH), 126.0 (CH), 123.6 (C), 58.8 (CH), 52.5 (CH<sub>3</sub>), 52.2 (CH<sub>3</sub>), 45.8 (CH), 31.4 (CH<sub>2</sub>), 21.5 (CH<sub>2</sub>); HRMS (ESI-TOF)  $m/z$ :  $[\text{M} + \text{Na}]^+$  Calcd for  $\text{C}_{24}\text{H}_{22}\text{O}_7\text{Na}$  445.1263; Found 445.1262.

**2-Iodonaphthalene-1,4-dione (21cc):**<sup>6</sup> Prepared by using literature procedure and purified by

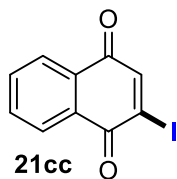

column chromatography using EtOAc/hexane (0.2:9.8 to 0.5:9.5) and isolated as orange solid. Yield: 35% (630 mg). MP.: 108-110 °C. IR (Neat):  $\nu_{\text{max}}$  3040, 1647, 1584, 1560, 1293, 1243, 1113, 1054, 907, 773, 687 and 663  $\text{cm}^{-1}$ ;  $^1\text{H}$  NMR ( $\text{CDCl}_3$ , 500 MHz):  $\delta$  8.17 (1H, dd,  $J = 7.5, 2.0$  Hz), 8.08 (1H, dd,  $J = 7.25, 2.0$  Hz), 7.90 (1H, s), 7.79 (1H, dt,  $J = 7.5, 1.5$  Hz), 7.74 (1H, dt,  $J = 7.5, 1.5$  Hz);  $^{13}\text{C}\{^1\text{H}\}$  NMR ( $\text{CDCl}_3$ , DEPT-135, 100 MHz):  $\delta$  182.0 (C, C=O), 178.7 (C, C=O), 148.4 (CH), 134.3 (CH), 133.9 (CH), 131.7 (C), 129.7 (C), 128.2 (CH), 127.0 (CH), 123.0 (C, C-I); HRMS (ESI-TOF)  $m/z$ :  $[\text{M} + \text{Na}]^+$  Calcd for  $\text{C}_{10}\text{H}_5\text{NaIO}_2$  306.9232; Found 306.9232.

**Table S5:** Correlation NMR data for the compound **8** (Deoxyneocryptotanshinone):<sup>3</sup>

| 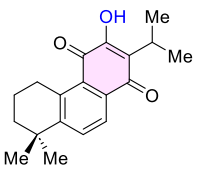<br>3-Hydroxy-2-isopropyl-8,8-dimethyl-5,6,7,8-tetrahydrophenanthrene-1,4-dione<br>[Deoxyneocryptotanshinone <b>8</b> ] |                                                                                | Isolated compound<br><sup>13</sup> C NMR (125 MHz, CDCl <sub>3</sub> ) | Present synthetic compound<br><sup>13</sup> C NMR (125 MHz, CDCl <sub>3</sub> ) |
|----------------------------------------------------------------------------------------------------------------------------------------------------------------------------------------------------------|--------------------------------------------------------------------------------|------------------------------------------------------------------------|---------------------------------------------------------------------------------|
|                                                                                                                                                                                                          |                                                                                |                                                                        |                                                                                 |
|                                                                                                                                                                                                          |                                                                                | 183.4 (C-11)                                                           | 183.4 (C, C=O)                                                                  |
| Isolated compound<br><sup>1</sup> H NMR (500 MHz, CDCl <sub>3</sub> )                                                                                                                                    | Present synthetic compound<br><sup>1</sup> H NMR (500 MHz, CDCl <sub>3</sub> ) | 153.3 (C-12)                                                           | 153.2 (C)                                                                       |
|                                                                                                                                                                                                          |                                                                                | 152.5 (C-10)                                                           | 152.5 (C)                                                                       |
| 7.97 (1H, d, <i>J</i> = 8.2 Hz)                                                                                                                                                                          | 8.00 (1H, d, <i>J</i> = 8.0 Hz)                                                | 140.7 (C-4)                                                            | 140.6 (C)                                                                       |
|                                                                                                                                                                                                          |                                                                                | 133.4 (C-6)                                                            | 133.3 (CH)                                                                      |
| 7.82 (1H, s, <i>OH</i> )                                                                                                                                                                                 | 7.73 (1H, d, <i>J</i> = 8.0 Hz) and                                            | 132.8 (C-8)                                                            | 132.7 (C)                                                                       |
| 7.71 (1H, d, <i>J</i> = 8.2 Hz)                                                                                                                                                                          | 7.73 (1H, s, <i>OH</i> )                                                       | 126.5 (C-9)                                                            | 126.4 (C)                                                                       |
| 3.37 (1H, septet, <i>J</i> = 6.5 Hz)                                                                                                                                                                     | 3.36 (1H, septet, <i>J</i> = 7.0 Hz)                                           | 125.1 (C-7)                                                            | 126.1 (C)                                                                       |
|                                                                                                                                                                                                          |                                                                                | 123.8 (C-13)                                                           | 125.0 (CH)                                                                      |
| 3.20 (2H, t, <i>J</i> = 6.4 Hz)                                                                                                                                                                          | 3.26 (2H, t, <i>J</i> = 6.5 Hz)                                                | 37.8 (C-3)                                                             | 37.7 (CH <sub>2</sub> )                                                         |
| 1.79 (4H, m)                                                                                                                                                                                             | 1.86-1.81 (2H, m)                                                              | - (C-5)                                                                | 34.8 (C)                                                                        |
|                                                                                                                                                                                                          | 1.68-1.66 (2H, m)                                                              | 31.8 (C-18 and C-19)                                                   | 31.8 (2 x CH <sub>3</sub> )                                                     |
| 1.30 (6H, s)                                                                                                                                                                                             | 1.32 (6H, s)                                                                   | 30.0 (C-1)                                                             | 29.9 (CH <sub>2</sub> )                                                         |
| 1.29 (6H, d, <i>J</i> = 7.0 Hz)                                                                                                                                                                          | 1.29 (6H, d, <i>J</i> = 7.0 Hz)                                                | 24.5 (C-15)                                                            | 24.4 (CH)                                                                       |
|                                                                                                                                                                                                          |                                                                                | 19.9 (C-16 and C-17)                                                   | 19.8 (2 x CH <sub>3</sub> )                                                     |
|                                                                                                                                                                                                          |                                                                                | 19.2 (C-2)                                                             | 19.1 (CH <sub>2</sub> )                                                         |

**Table S6:** Correlation NMR data for the compound **9** (Miltirone):<sup>4</sup>

| 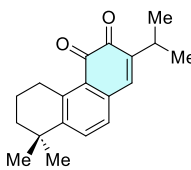<br>2-Isopropyl-8,8-dimethyl-5,6,7,8-tetrahydrophenanthrene-3,4-dione<br>[Miltirone <b>9</b> ] |                                                                                      | Isolated compound<br><sup>13</sup> C NMR (100 MHz,<br>CDCl <sub>3</sub> ) | Present synthetic<br>compound<br><sup>13</sup> C NMR (125 MHz,<br>CDCl <sub>3</sub> ) |
|---------------------------------------------------------------------------------------------------------------------------------------------------------------------------------|--------------------------------------------------------------------------------------|---------------------------------------------------------------------------|---------------------------------------------------------------------------------------|
|                                                                                                                                                                                 |                                                                                      | 182.3                                                                     | 182.4 (C, C=O)                                                                        |
|                                                                                                                                                                                 |                                                                                      | 181.4                                                                     | 181.6 (C, C=O)                                                                        |
| Isolated compound<br><sup>1</sup> H NMR (400 MHz,<br>CDCl <sub>3</sub> )                                                                                                        | Present synthetic<br>compound<br><sup>1</sup> H NMR (500 MHz,<br>CDCl <sub>3</sub> ) | 149.6                                                                     | 149.7 (C)                                                                             |
|                                                                                                                                                                                 |                                                                                      | 144.9                                                                     | 145.1 (C)                                                                             |
| 7.56 (1H, d, <i>J</i> = 7.8 Hz)                                                                                                                                                 | 7.59 (1H, d, <i>J</i> = 8.0<br>Hz)                                                   | 144.4                                                                     | 144.5 (C)                                                                             |
| 7.08 (1H, d, <i>J</i> = 7.8 Hz)                                                                                                                                                 | 7.10 (1H, d, <i>J</i> = 8.0<br>Hz)                                                   | 139.9                                                                     | 139.8 (CH)                                                                            |
| 7.05 (1H, s)                                                                                                                                                                    | 7.07 (1H, s, olefinic- <i>H</i> )                                                    | 134.3                                                                     | 134.4 (C)                                                                             |
| 3.14 (2H, t, <i>J</i> = 6.6 Hz)                                                                                                                                                 | 3.18 (2H, t, <i>J</i> = 6.5 Hz)                                                      | 133.7                                                                     | 133.7 (CH)                                                                            |
| 2.98 (1H, septet, <i>J</i> = 6.9<br>Hz)                                                                                                                                         | 3.02 (1H, septet, <i>J</i> =<br>7.0 Hz)                                              | 128.1                                                                     | 128.3 (C)                                                                             |
| 1.75 (2H, m)                                                                                                                                                                    | 1.82-1.77 (2H, m)                                                                    | 127.9                                                                     | 127.8 (CH)                                                                            |
| 1.61 (2H, m)                                                                                                                                                                    | 1.66-1.64 (2H, m)                                                                    | 37.7                                                                      | 37.9 (CH <sub>2</sub> )                                                               |
| 1.26 (6H, s)                                                                                                                                                                    | 1.30 (6H, s)                                                                         | 34.4                                                                      | 34.5 (C)                                                                              |
| 1.13 (6H, d, <i>J</i> = 6.9 Hz)                                                                                                                                                 | 1.16 (6H, d, <i>J</i> = 7.0<br>Hz)                                                   | 31.7 (2 x C)                                                              | 31.8 (2 x CH <sub>3</sub> )                                                           |
|                                                                                                                                                                                 |                                                                                      | 29.8                                                                      | 29.8 (CH <sub>2</sub> )                                                               |
|                                                                                                                                                                                 |                                                                                      | 26.8                                                                      | 26.9 (CH)                                                                             |
|                                                                                                                                                                                 |                                                                                      | 21.5 (2 x C)                                                              | 21.5 (2 x CH <sub>3</sub> )                                                           |
|                                                                                                                                                                                 |                                                                                      | 19.0                                                                      | 19.1 (CH <sub>2</sub> )                                                               |

**Table S7:** Correlation NMR data for the compound **3s** (Vitamin K<sub>3</sub>):<sup>5</sup>

| 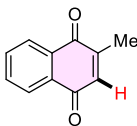<br>2-Methylnaphthalene-1,4-dione ( <b>3s</b> )<br>Vitamin-K <sub>3</sub> |                                                                                | Isolated compound<br><sup>13</sup> C NMR (67.9 MHz, CDCl <sub>3</sub> ) | Present synthetic compound<br><sup>13</sup> C NMR (125 MHz, CDCl <sub>3</sub> ) |
|------------------------------------------------------------------------------------------------------------------------------------------------------------|--------------------------------------------------------------------------------|-------------------------------------------------------------------------|---------------------------------------------------------------------------------|
|                                                                                                                                                            |                                                                                | 185.5                                                                   | 185.5 (C, C=O)                                                                  |
|                                                                                                                                                            |                                                                                | 184.9                                                                   | 184.9 (C, C=O)                                                                  |
| Isolated compound<br><sup>1</sup> H NMR (270 MHz, CDCl <sub>3</sub> )                                                                                      | Present synthetic compound<br><sup>1</sup> H NMR (500 MHz, CDCl <sub>3</sub> ) | 148.2                                                                   | 148.1 (C)                                                                       |
|                                                                                                                                                            |                                                                                | 135.7                                                                   | 135.6 (CH)                                                                      |
| 8.07 (1H, dd, <i>J</i> = 10.4, 5.9 Hz)                                                                                                                     | 8.10-8.07 (1H, m)                                                              | 133.6                                                                   | 133.6 (CH)                                                                      |
| 8.06 (1H, dd, <i>J</i> = 10.4, 5.61 Hz)                                                                                                                    | 8.06-8.03 (1H, m)                                                              | 133.5                                                                   | 133.5 (CH)                                                                      |
| 7.72 (1H, d, <i>J</i> = 5.6 Hz)                                                                                                                            | 7.73-7.70 (2H, m)                                                              | 132.3                                                                   | 132.2 (C)                                                                       |
| 7.71 (1H, d, <i>J</i> = 5.9 Hz)                                                                                                                            |                                                                                |                                                                         |                                                                                 |
| 6.84 (1H, q, <i>J</i> = 1.5 Hz)                                                                                                                            | 6.83 (1H, br s)                                                                | 132.2                                                                   | 132.1 (C)                                                                       |
| 2.19 (3H, d, <i>J</i> = 1.5 Hz)                                                                                                                            | 2.19 (3H, br s)                                                                | 126.5                                                                   | 126.5 (CH)                                                                      |
|                                                                                                                                                            |                                                                                | 126.1                                                                   | 126.1 (CH)                                                                      |
|                                                                                                                                                            |                                                                                | 16.4                                                                    | 16.4 (CH <sub>3</sub> )                                                         |

**Figure S10:** NMR experiment to study the effect of solvent in inducing enol-enol tautomerism of **1a** at 25 °C.  $^1\text{H}$  NMR spectra (500 MHz):

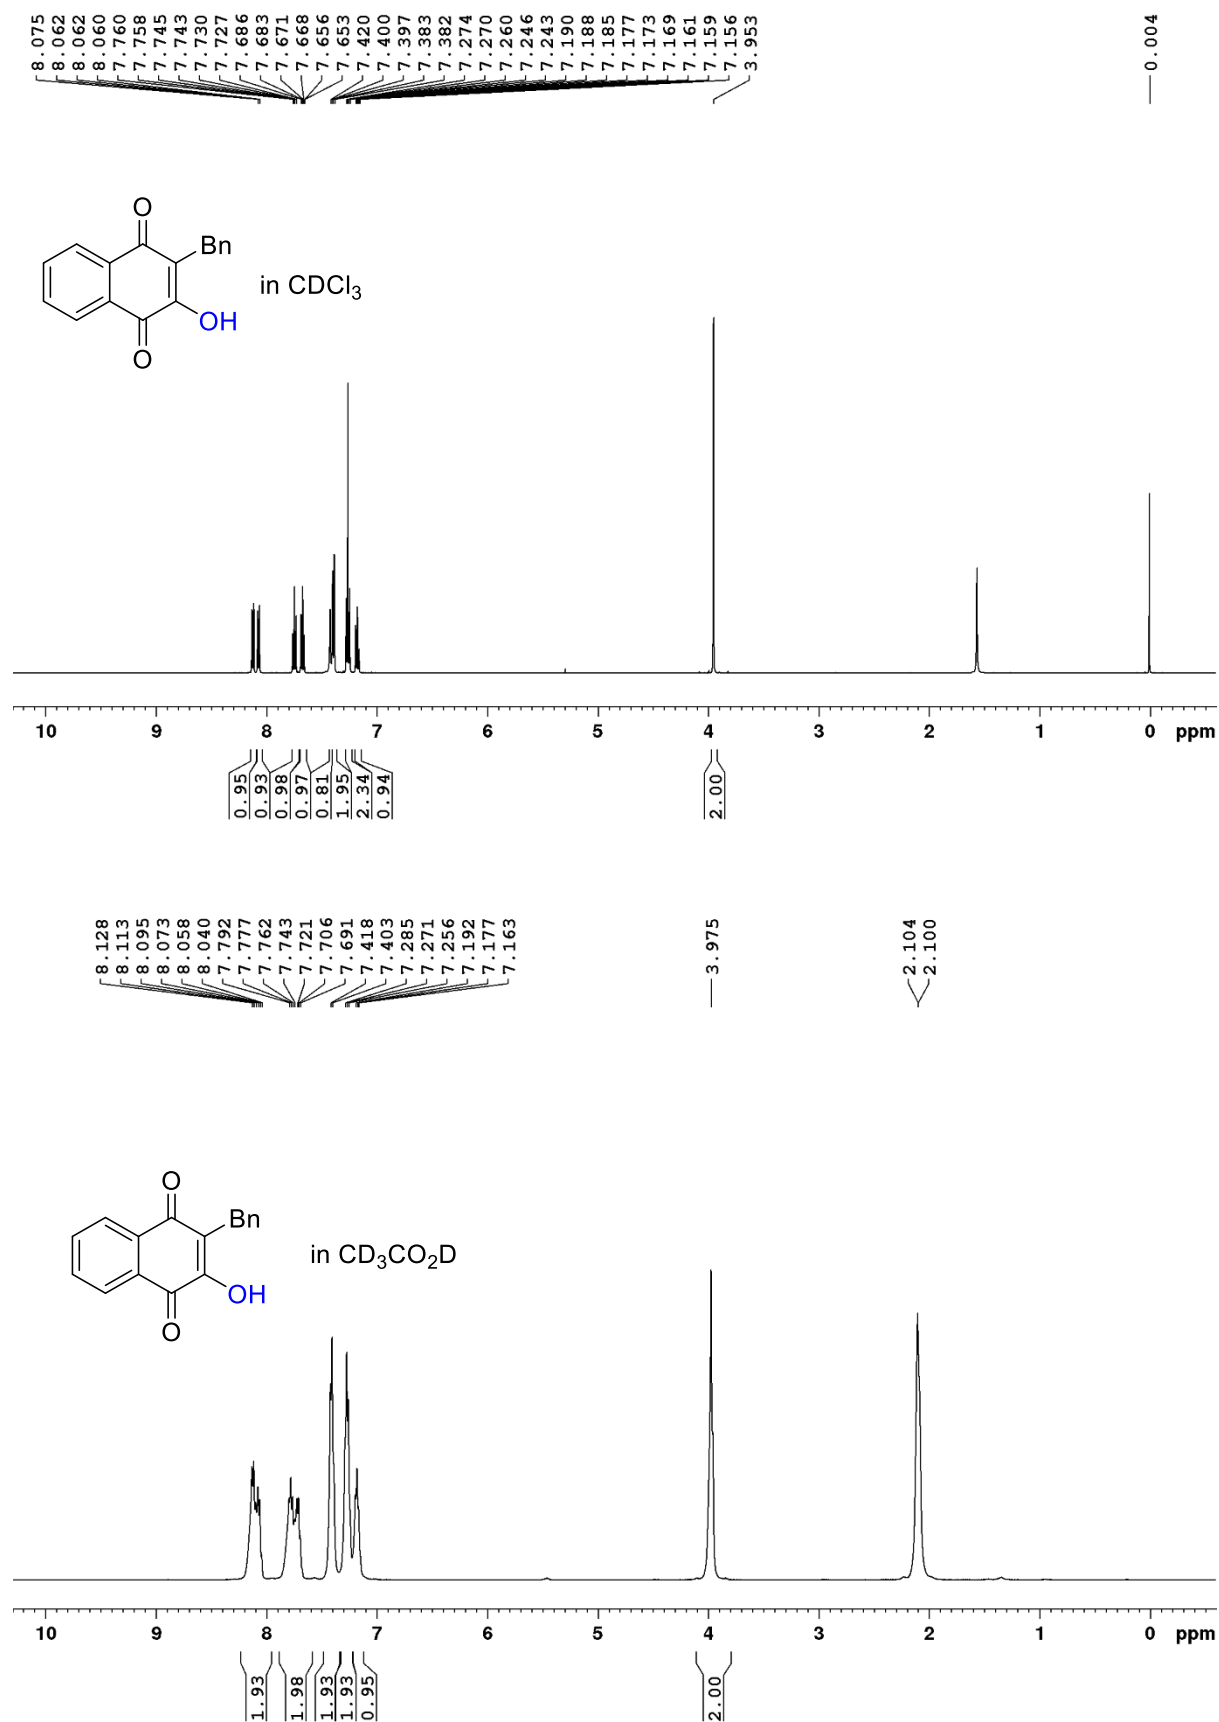

$^{13}\text{C}$  NMR spectra (100 MHz):

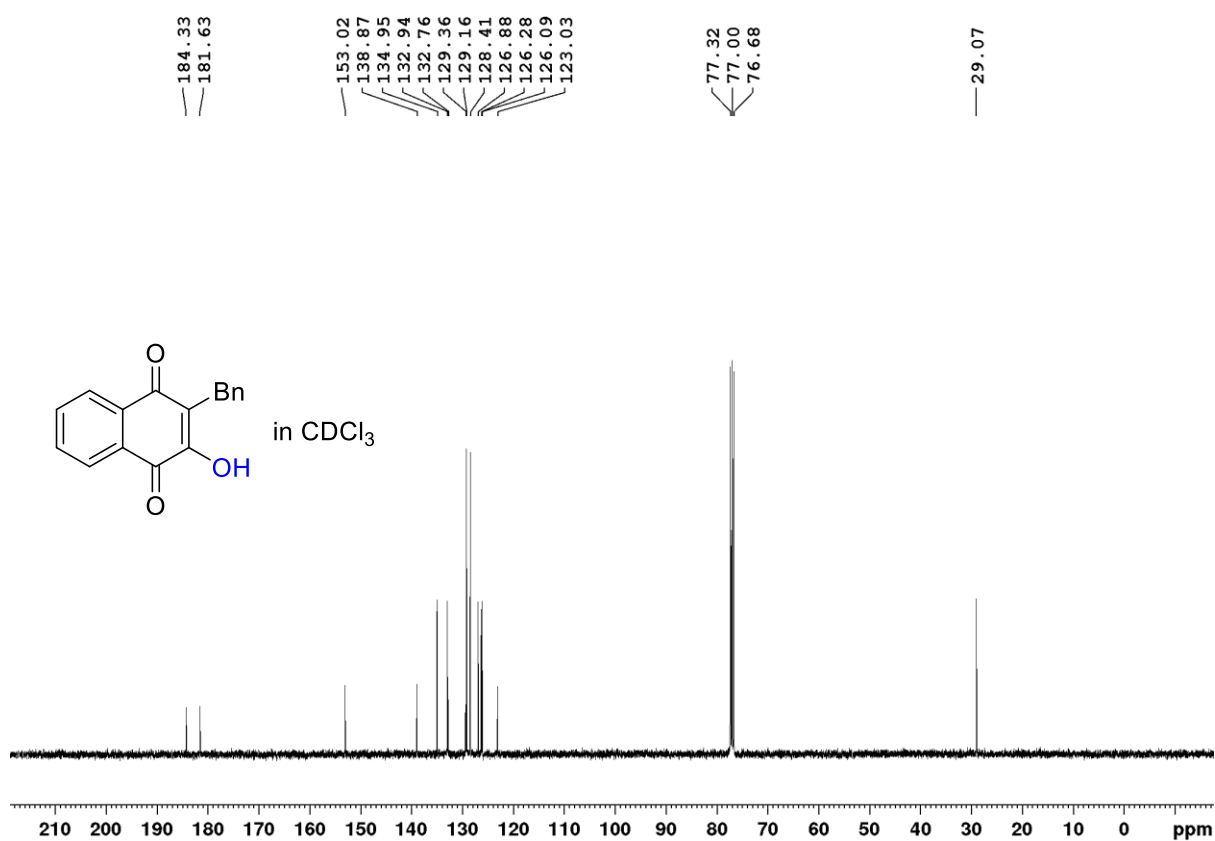

$^{13}\text{C}$  NMR spectra (125 MHz):

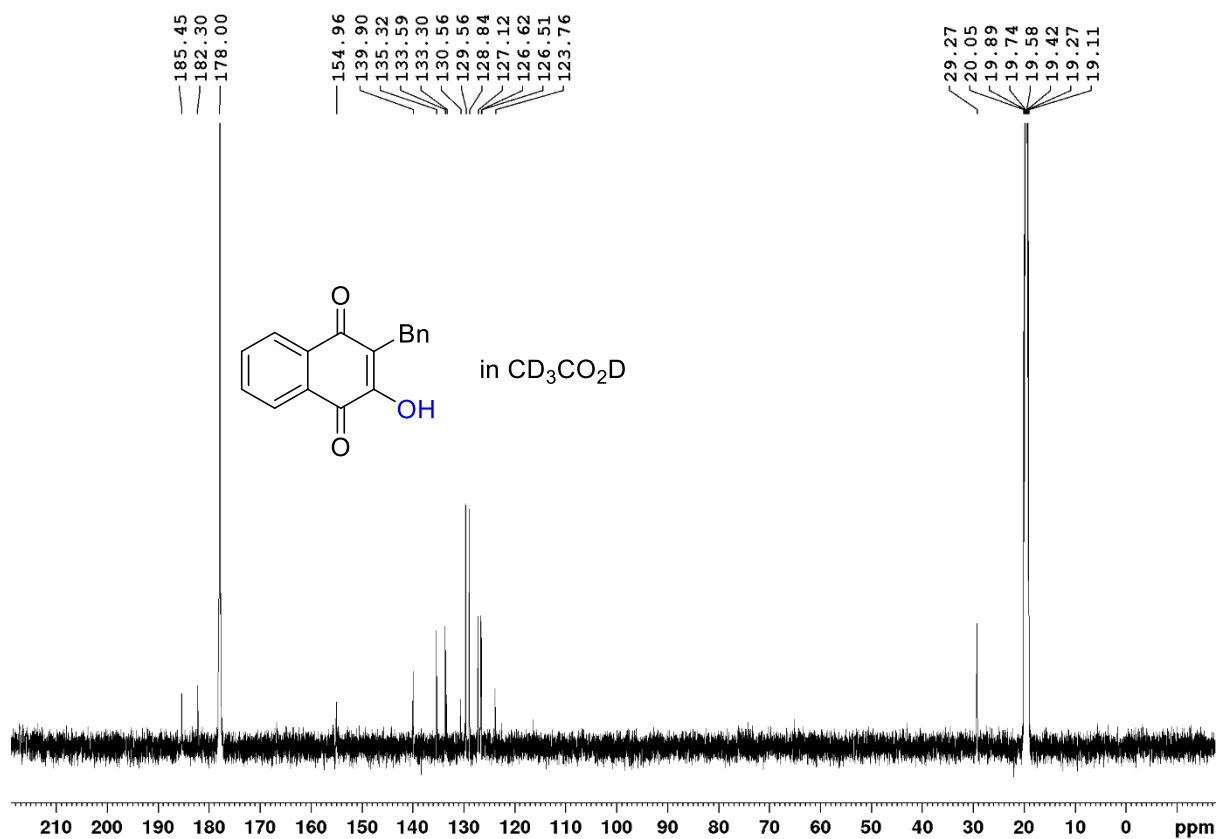



DEPT-135 Spectra (100 MHz):

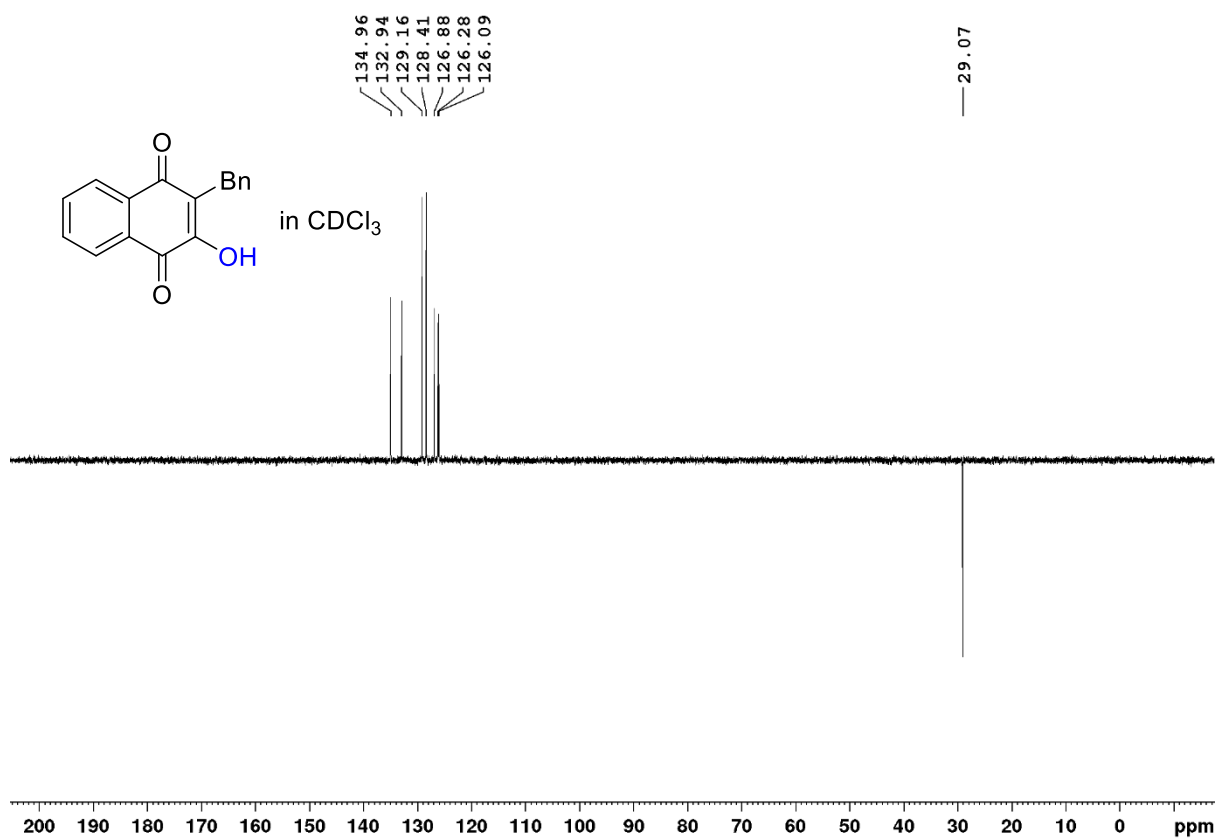

DEPT-135 Spectra (125 MHz):

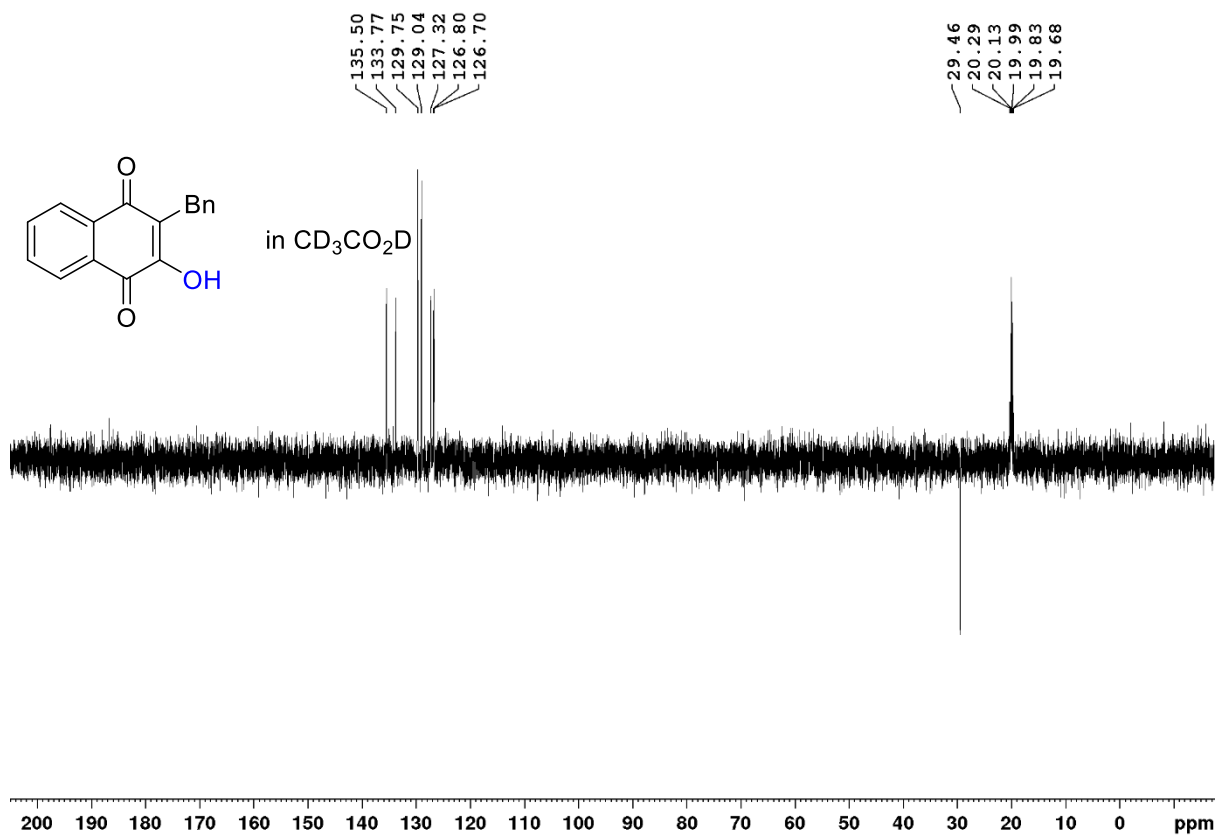

**Figure S11:** Online experiment to study the role of HI (57 wt.% in H<sub>2</sub>O) in HDH reaction of **1a** in CD<sub>3</sub>CO<sub>2</sub>D at 25 °C.

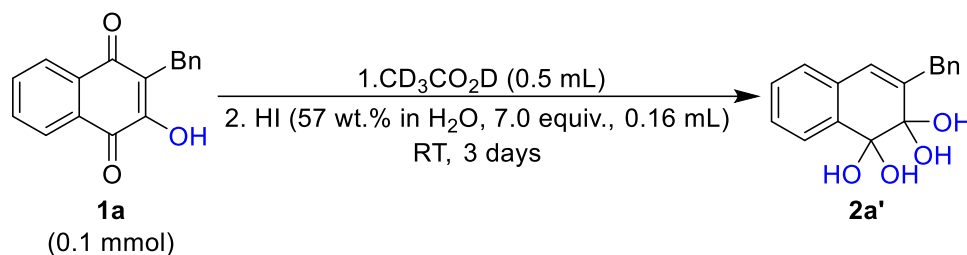

**Procedure:** For the online NMR experiment to study the effect of aq. HI in HDH reaction of **1a**: The <sup>1</sup>H and <sup>13</sup>C NMR spectra of the on-going reactions of **1a** (0.1 mmol) in presence of HI (57 wt.% in H<sub>2</sub>O, 7.0 equiv., 0.16 mL) in CD<sub>3</sub>CO<sub>2</sub>D (0.5 mL) at 25 °C were reported in Figure S11. Spectra were recorded after 15 minutes, 2 h 15 minutes and 3 days intervals (**spectra-1, 2, 3**) for the reaction course. It was observed that the aq. HI is facilitating the enol-enol tautomerism and in its presence the reactant and product were completely in acetal form.

Spectra-1: <sup>1</sup>H NMR (500 MHz, CD<sub>3</sub>CO<sub>2</sub>D):

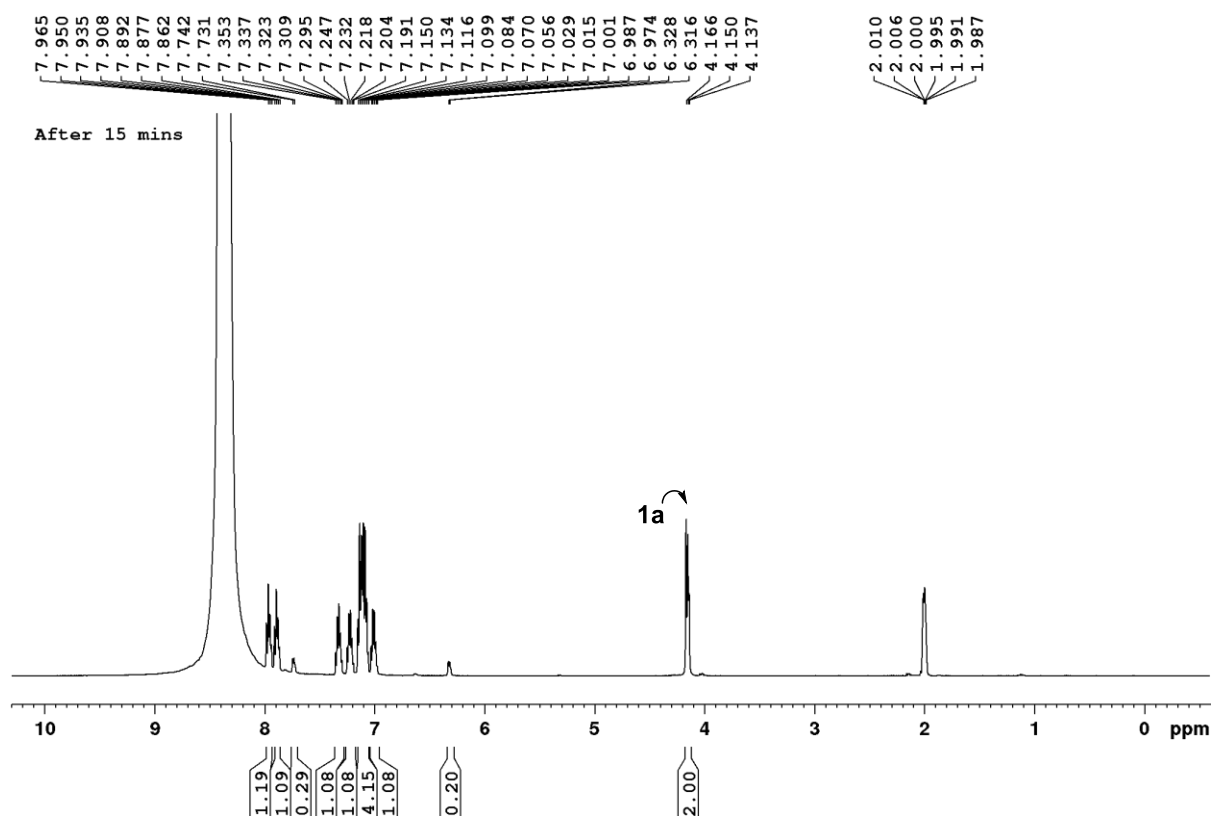

Spectra-1:  $^{13}\text{C}$  NMR (125 MHz,  $\text{CD}_3\text{CO}_2\text{D}$ ):

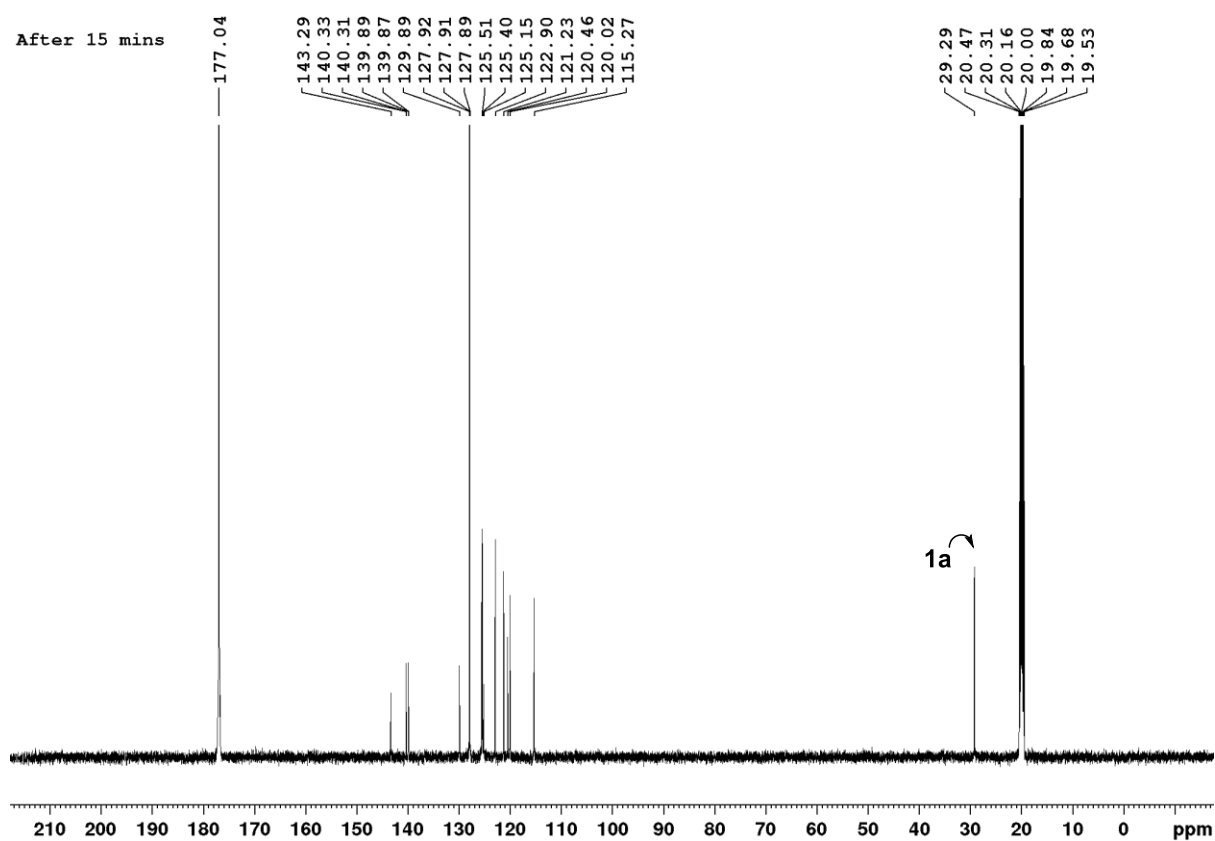

Spectra-1: DEPT-135 (125 MHz,  $\text{CD}_3\text{CO}_2\text{D}$ ):

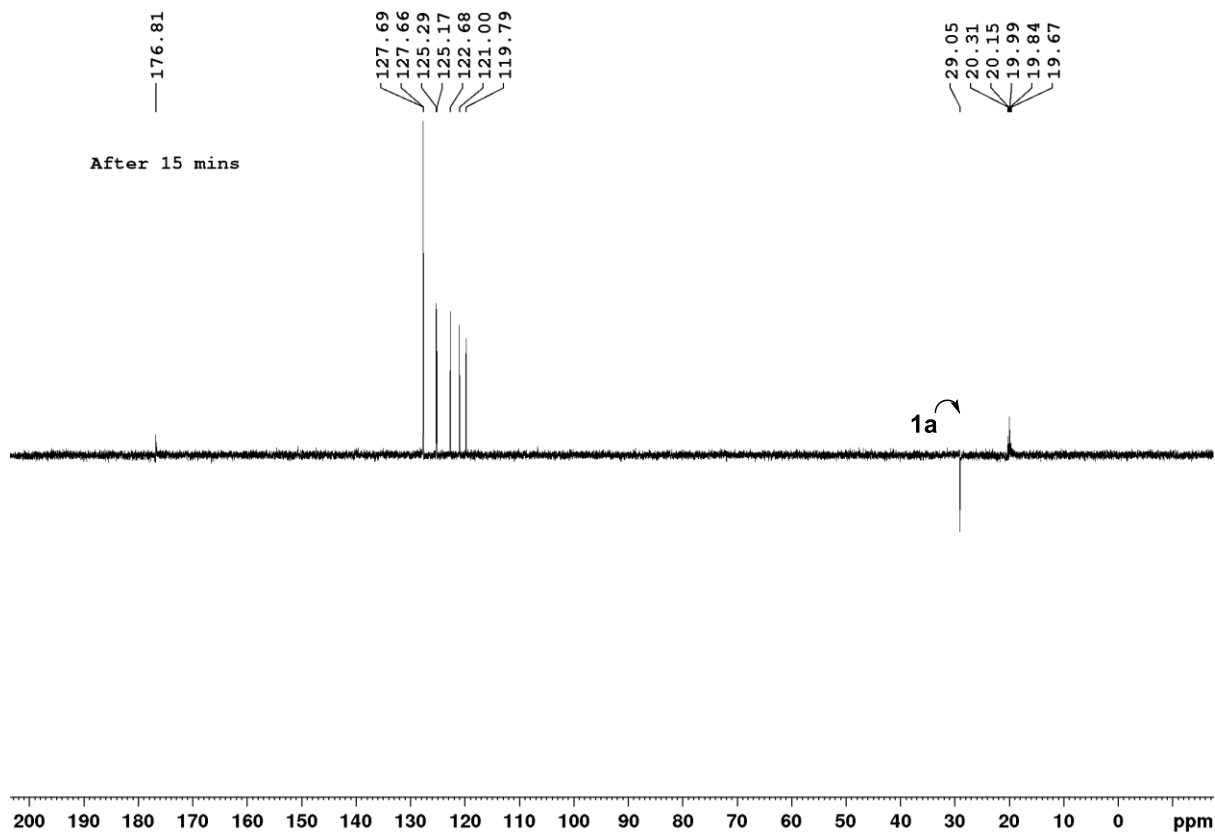

Spectra-2:  $^1\text{H}$  NMR (500 MHz,  $\text{CD}_3\text{CO}_2\text{D}$ ):

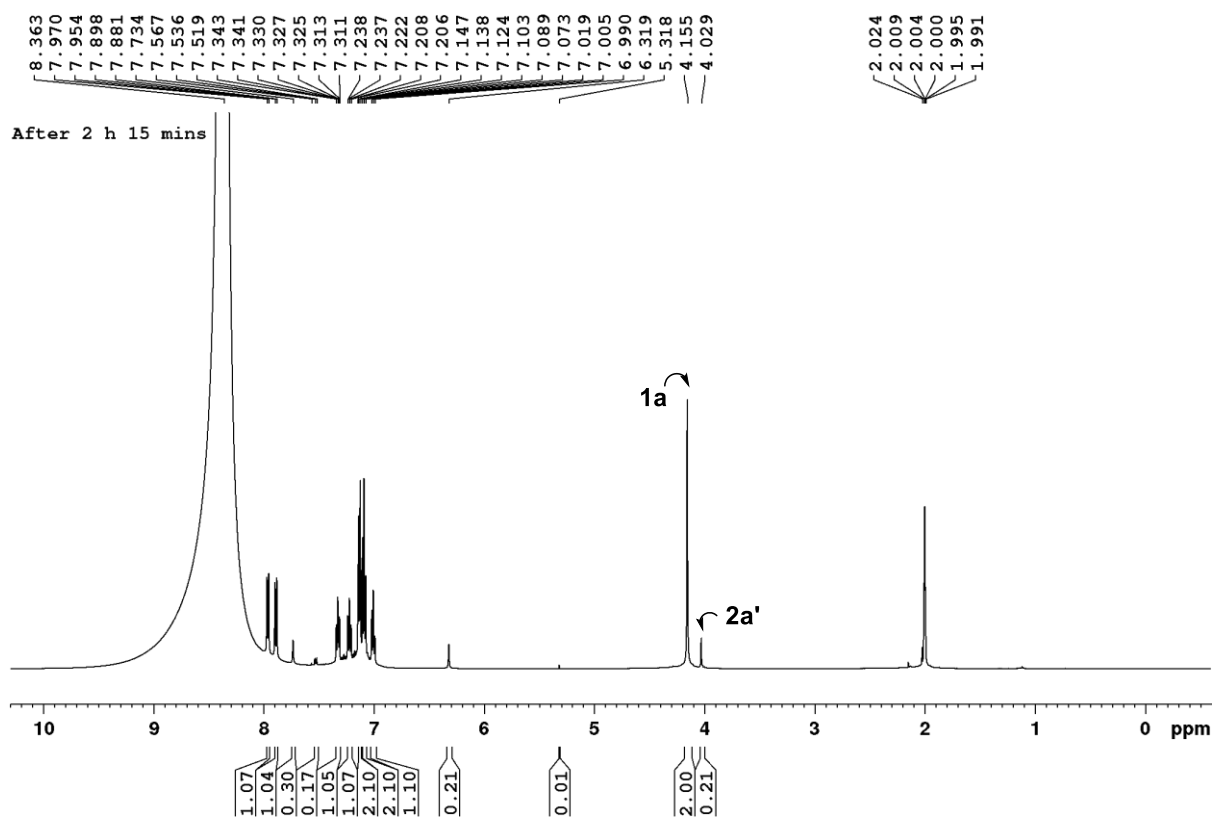

Spectra-2:  $^{13}\text{C}$  NMR (125 MHz,  $\text{CD}_3\text{CO}_2\text{D}$ ):

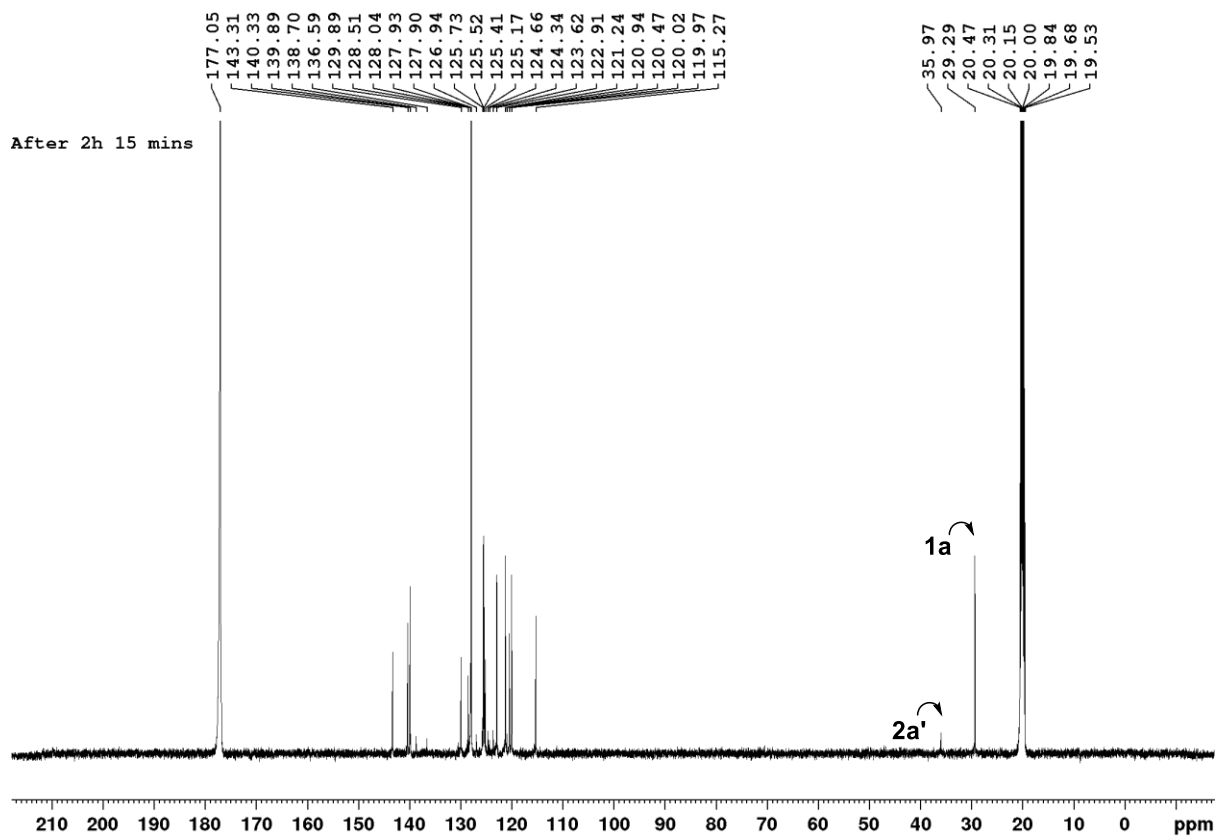

Spectra-2: DEPT-135 (125 MHz, CD<sub>3</sub>CO<sub>2</sub>D):

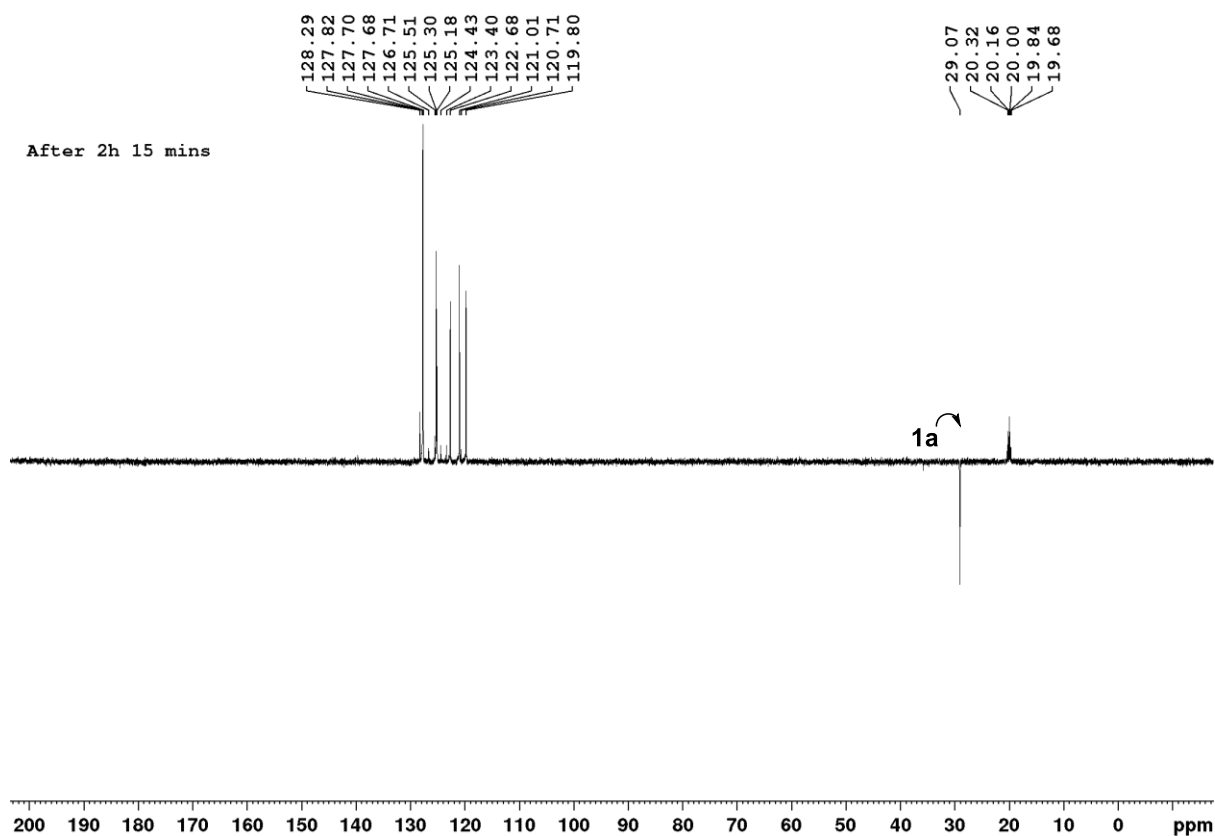

Spectra-3: <sup>1</sup>H NMR (500 MHz, CD<sub>3</sub>CO<sub>2</sub>D):

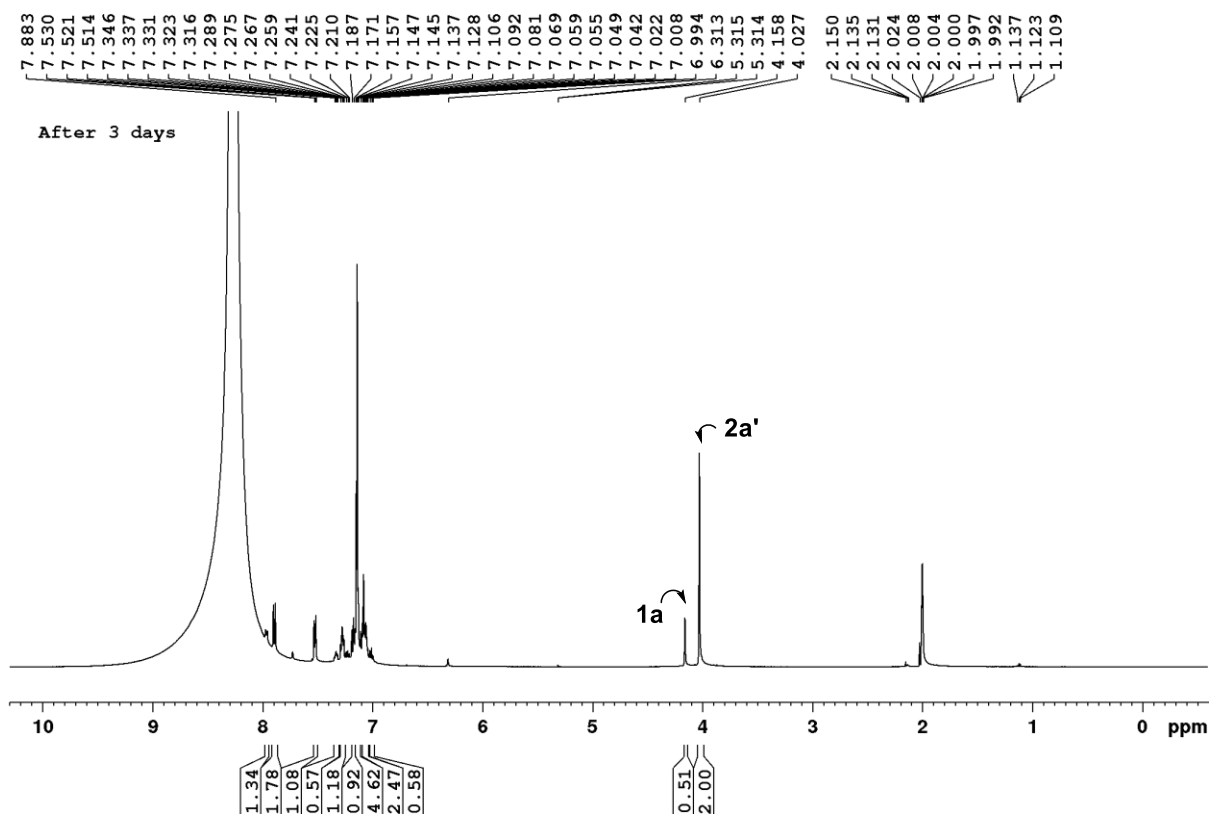

Spectra-3:  $^{13}\text{C}$  NMR (125 MHz,  $\text{CD}_3\text{CO}_2\text{D}$ ):

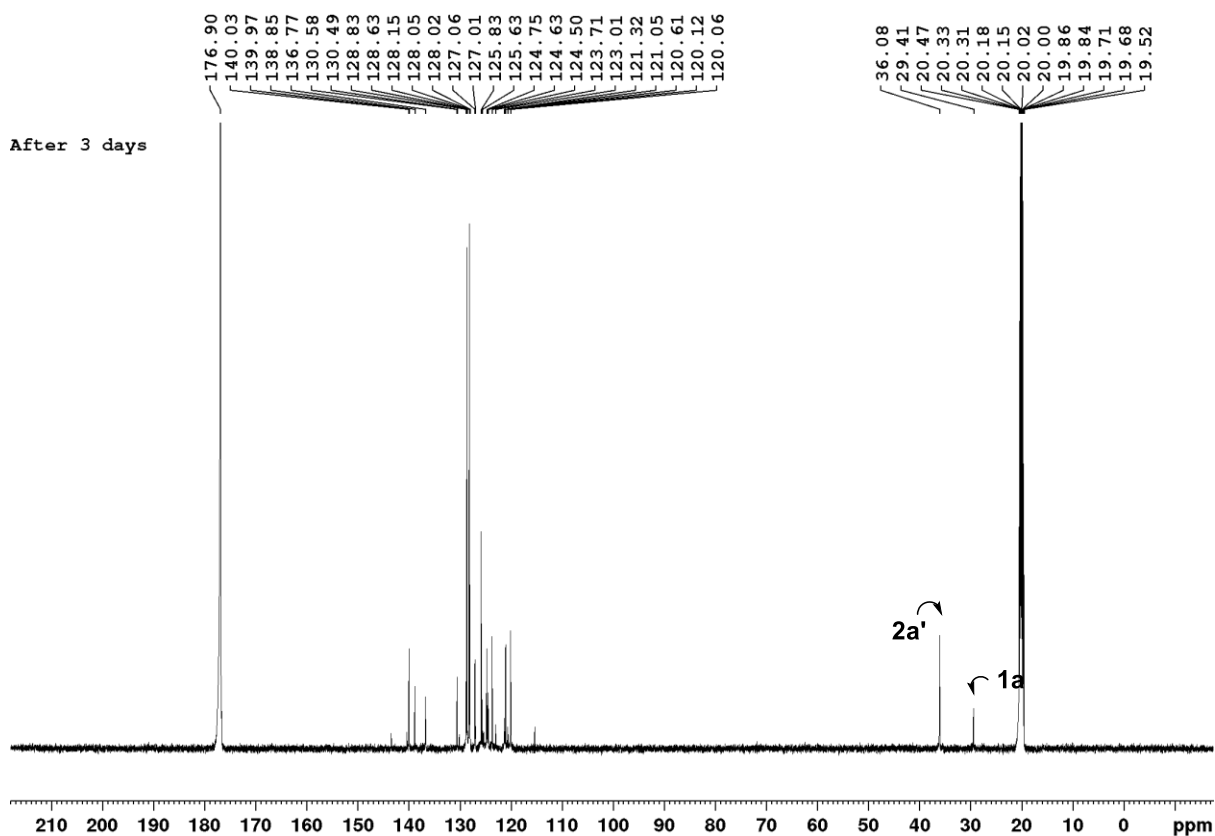

Spectra-3: DEPT-135 (125 MHz,  $\text{CD}_3\text{CO}_2\text{D}$ ):

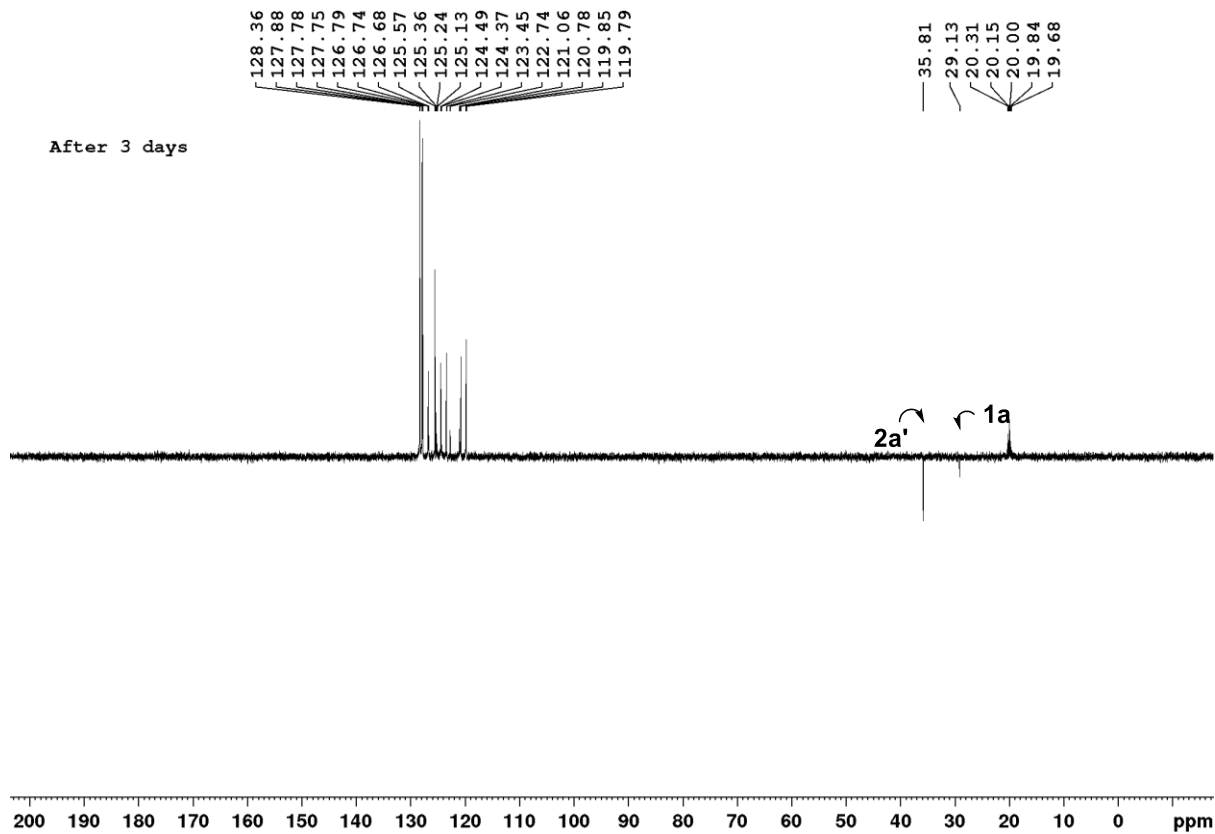

**Figure S12:** The on-line ESI-HRMS analysis of on-going reaction between **4a** and aq. HI (57 wt.% in H<sub>2</sub>O) in AcOH at 90 °C under thermal condition.

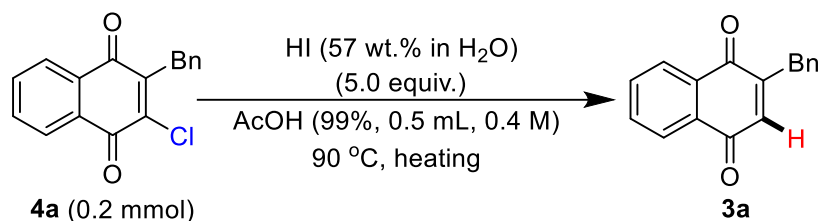

Experimentally observed key-intermediate by using on-line ESI-HRMS analysis:

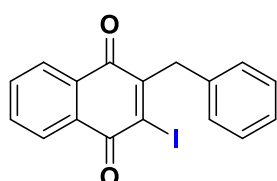

Formula [M]: C<sub>17</sub>H<sub>11</sub>IO<sub>2</sub>  
Exact Mass [M + H] = 374.9882

**Figure S13:** The on-line ESI-HRMS of an on-going reaction of **1a** with aq. HI (57 wt.% in H<sub>2</sub>O) and in AcOH at 90 °C under thermal condition.

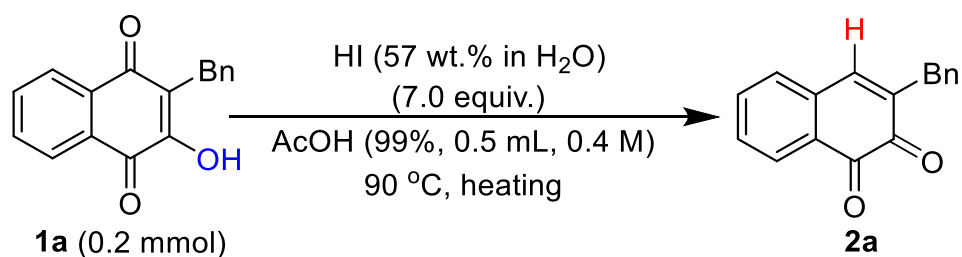

Experimentally observed key-intermediates by using on-line ESI-HRMS analysis:

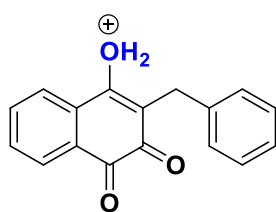

Formula [M]: C<sub>17</sub>H<sub>13</sub>O<sub>3</sub><sup>+</sup>  
Exact Mass [M+NH<sub>4</sub>] = 283.1203

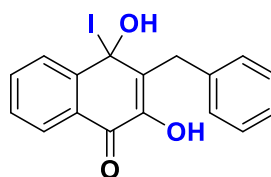

Formula [M] = C<sub>17</sub>H<sub>13</sub>IO<sub>3</sub>  
Exact Mass [M] = 391.9909  
Exact Mass [M+H] = 392.9988



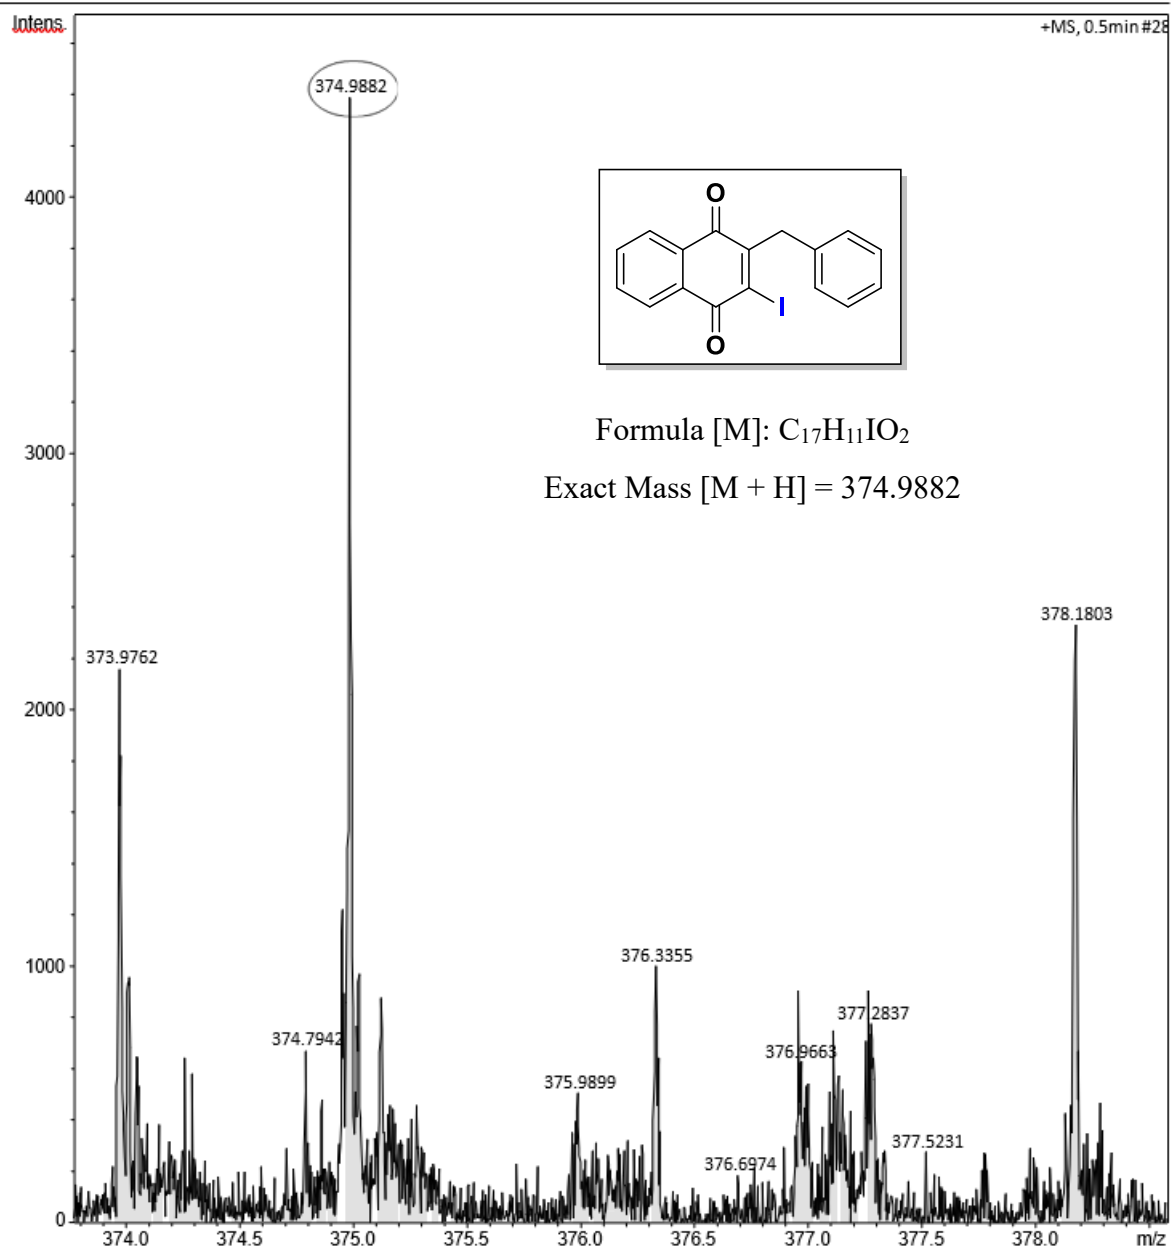

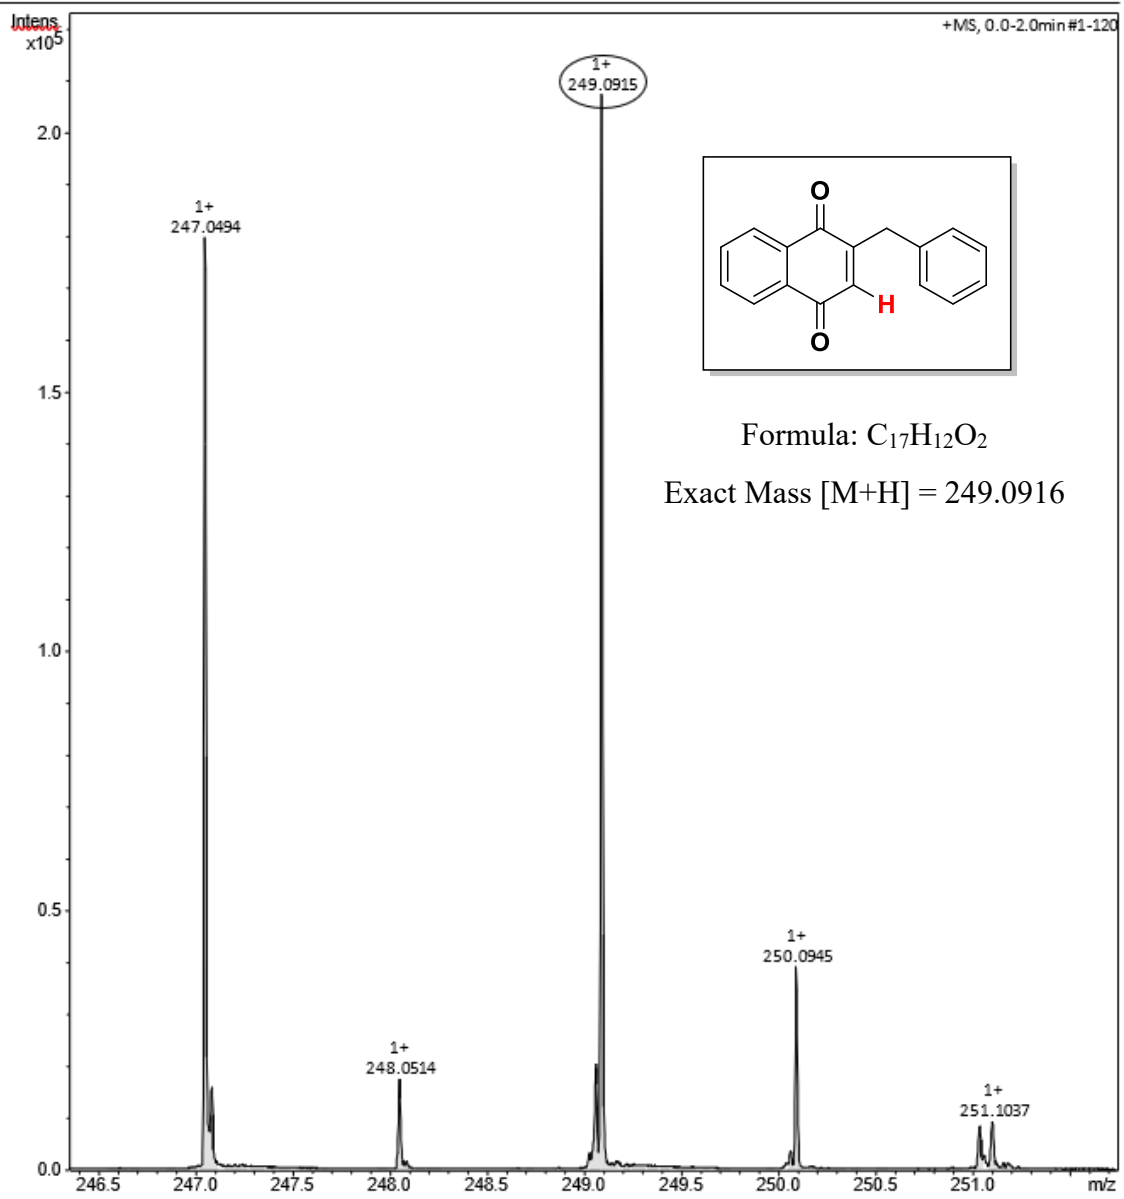

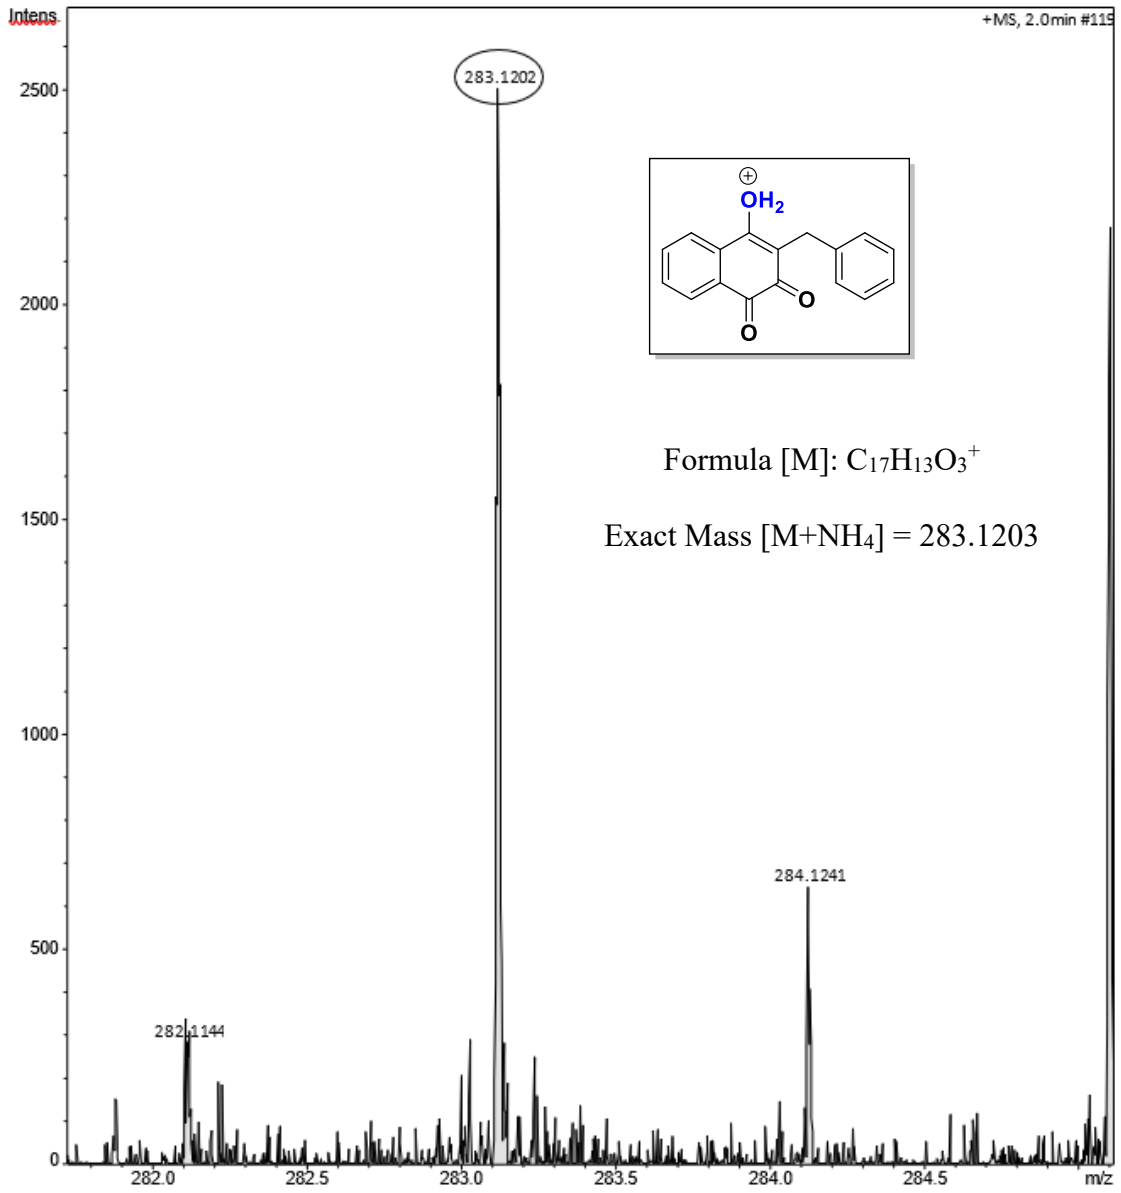

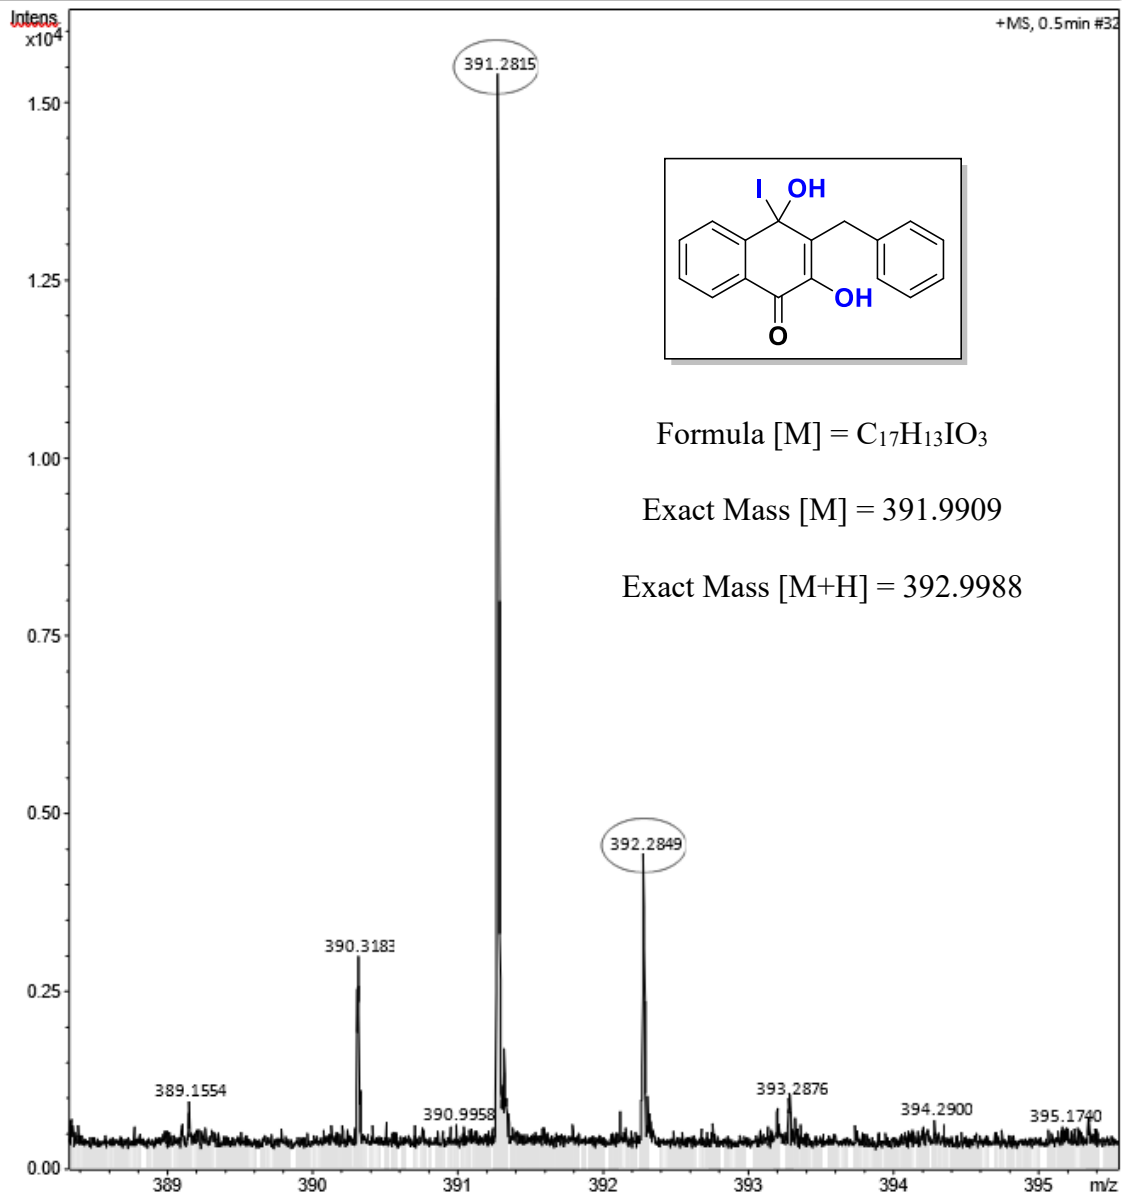

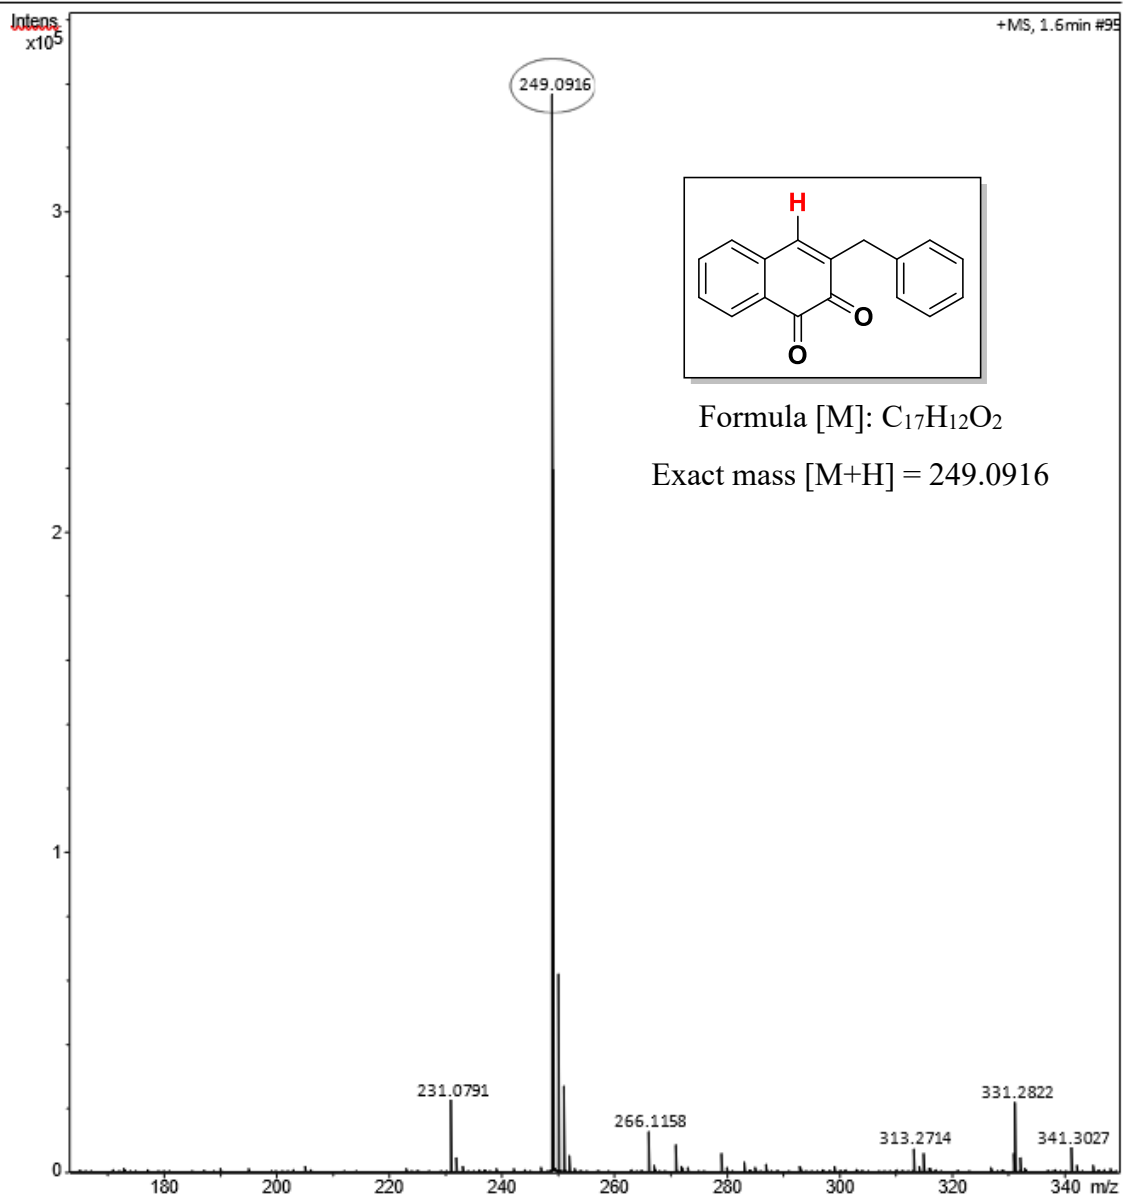

## X-Ray Single Crystal Data for 3-benzyl-naphthalene-1,2-dione (2a). The Ellipsoid Contour % Probability Levels are 50%

Crystallized from CHCl<sub>3</sub>-EtOAc; C<sub>17</sub>H<sub>12</sub>O<sub>2</sub>; Mr = 248.27; monoclinic; space group = P 1 21/C 1; A metallic orangish orange crystal of 0.21x0.12x0.11 mm<sup>3</sup> was used.

**Table S8.** Crystal data for 3-benzyl-naphthalene-1,2-dione **2a** (CCDC-2395504)

|                        |                                            |                                      |                          |
|------------------------|--------------------------------------------|--------------------------------------|--------------------------|
| Bond precision:        | C-C = 0.0022 Å                             | Wavelength=0.71073                   |                          |
| Cell:                  | a=17.742 (4)<br>alpha=90                   | b=5.4248 (11)<br>beta=95.498 (8)     | c=12.764 (2)<br>gamma=90 |
| Temperature:           | 298 K                                      |                                      |                          |
|                        | Calculated                                 | Reported                             |                          |
| Volume                 | 1222.8 (4)                                 | 1222.8 (4)                           |                          |
| Space group            | P 21/c                                     | P 1 21/c 1                           |                          |
| Hall group             | -P 2ybc                                    | -P 2ybc                              |                          |
| Moiety formula         | C17 H12 O2                                 | C17 H12 O2                           |                          |
| Sum formula            | C17 H12 O2                                 | C17 H12 O2                           |                          |
| Mr                     | 248.27                                     | 248.27                               |                          |
| Dx, g cm <sup>-3</sup> | 1.349                                      | 1.349                                |                          |
| Z                      | 4                                          | 4                                    |                          |
| Mu (mm <sup>-1</sup> ) | 0.088                                      | 0.088                                |                          |
| F000                   | 520.0                                      | 520.0                                |                          |
| F000'                  | 520.25                                     |                                      |                          |
| h, k, lmax             | 23, 7, 16                                  | 23, 7, 16                            |                          |
| Nref                   | 2833                                       | 2779                                 |                          |
| Tmin, Tmax             | 0.987, 0.990                               | 0.586, 0.746                         |                          |
| Tmin'                  | 0.982                                      |                                      |                          |
| Correction method=     | # Reported T Limits: Tmin=0.586 Tmax=0.746 |                                      |                          |
| AbsCorr =              | MULTI-SCAN                                 |                                      |                          |
| Data completeness=     | 0.981                                      | Theta(max)= 27.612                   |                          |
| R(reflections)=        | 0.0502 ( 2192)                             | wR2 (reflections)=<br>0.1350 ( 2779) |                          |
| S =                    | 1.066                                      | Npar= 172                            |                          |

Ellipsoid plot for 3-benzyl-naphthalene-1,2-dione (**2a**):

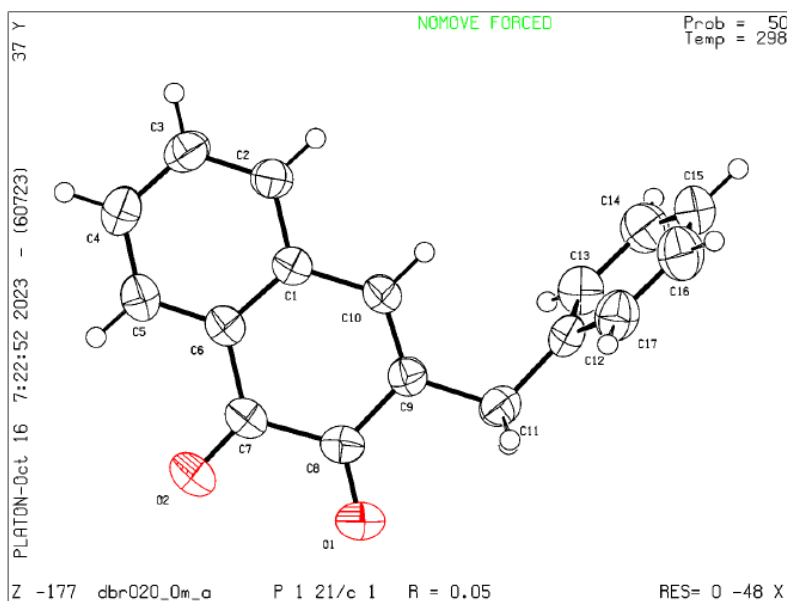

## X-Ray Single Crystal Data for 3-(4-methoxybenzyl)-naphthalene-1,2-dione (**2j**). The Ellipsoid Contour % Probability Levels are 50%

Crystallized from CHCl<sub>3</sub>-EtOAc; C<sub>18</sub>H<sub>14</sub>O<sub>3</sub>; Mr = 278.29; monoclinic; space group = P 1 21/C<sub>1</sub>; A metallic orangish orange crystal of 0.20x0.19x0.17 mm<sup>3</sup> was used.

**Table S9.** Crystal data for 3-(4-methoxybenzyl)-naphthalene-1,2-dione **2j** (CCDC-2395505)

|                                                               |                |                    |              |
|---------------------------------------------------------------|----------------|--------------------|--------------|
| Bond precision:                                               | C-C = 0.0027 Å | Wavelength=0.71073 |              |
| Cell:                                                         | a=19.0585(16)  | b=5.6006(5)        | c=13.1682(9) |
|                                                               | alpha=90       | beta=104.843(3)    | gamma=90     |
| Temperature:                                                  | 298 K          |                    |              |
| Volume                                                        | Calculated     | Reported           |              |
|                                                               | 1358.66(19)    | 1358.66(19)        |              |
| Space group                                                   | P 21/c         | P 1 21/c 1         |              |
| Hall group                                                    | -P 2ybc        | -P 2ybc            |              |
| Moiety formula                                                | C18 H14 O3     | C18 H14 O3         |              |
| Sum formula                                                   | C18 H14 O3     | C18 H14 O3         |              |
| Mr                                                            | 278.29         | 278.29             |              |
| Dx, g cm <sup>-3</sup>                                        | 1.360          | 1.360              |              |
| Z                                                             | 4              | 4                  |              |
| Mu (mm <sup>-1</sup> )                                        | 0.092          | 0.092              |              |
| F000                                                          | 584.0          | 584.0              |              |
| F000'                                                         | 584.30         |                    |              |
| h, k, lmax                                                    | 26, 7, 18      | 26, 7, 18          |              |
| Nref                                                          | 3684           | 3677               |              |
| Tmin, Tmax                                                    | 0.982, 0.984   | 0.624, 0.746       |              |
| Tmin'                                                         | 0.982          |                    |              |
| Correction method= # Reported T Limits: Tmin=0.624 Tmax=0.746 |                |                    |              |
| AbsCorr = MULTI-SCAN                                          |                |                    |              |
| Data completeness=                                            | 0.998          | Theta(max)= 29.188 |              |
| R(reflections)=                                               | 0.0613( 2012)  | wR2(reflections)=  |              |
| S =                                                           | 0.976          | 0.1622( 3677)      |              |
|                                                               | Npar= 191      |                    |              |

Ellipsoid plot for 3-(4-methoxybenzyl)-naphthalene-1,2-dione (**2j**):

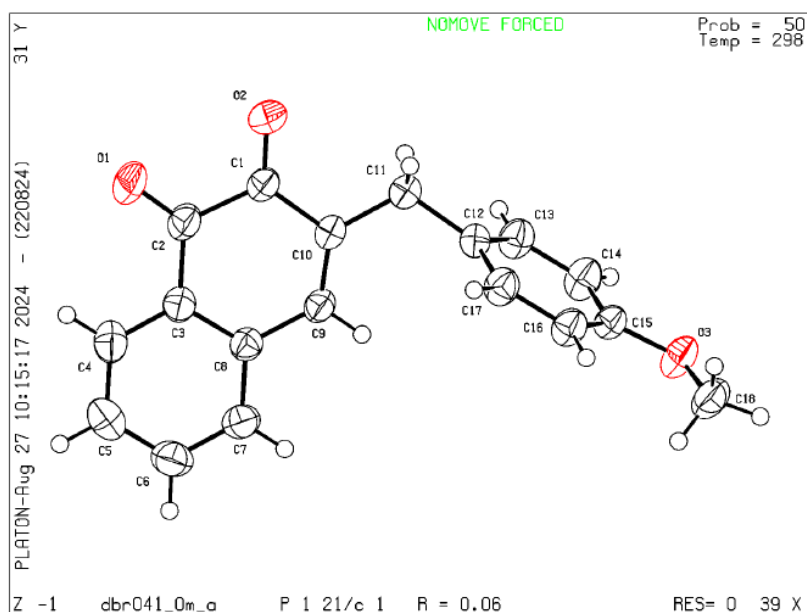



## X-Ray Single Crystal Data for 2-benzyl-naphthalene-1,4-dione (3a). The Ellipsoid Contour % Probability Levels are 50%

Crystallized from CHCl<sub>3</sub>-EtOAc; C<sub>17</sub>H<sub>12</sub>O<sub>2</sub>; Mr = 248.27; monoclinic; space group = P<sub>1</sub> 2<sub>1</sub>/n<sub>1</sub>; A metallic yellowish yellow crystal of 0.22x0.20x0.11 mm<sup>3</sup> was used.

**Table S10.** Crystal data for 2-benzyl-naphthalene-1,4-dione **3a** (CCDC-2395506)

|                                                               |                                                |                                                |               |
|---------------------------------------------------------------|------------------------------------------------|------------------------------------------------|---------------|
| Bond precision:                                               | C-C = 0.0019 Å                                 | Wavelength=0.71073                             |               |
| Cell:                                                         | a=5.4268 (1)                                   | b=10.2243 (2)                                  | c=22.7209 (5) |
|                                                               | alpha=90                                       | beta=94.593 (2)                                | gamma=90      |
| Temperature:                                                  | 299 K                                          |                                                |               |
| Volume                                                        | Calculated                                     | Reported                                       |               |
|                                                               | 1256.63 (4)                                    | 1256.63 (4)                                    |               |
| Space group                                                   | P 2 <sub>1</sub> /n                            | P 1 2 <sub>1</sub> /n 1                        |               |
| Hall group                                                    | -P 2 <sub>1</sub> yn                           | -P 2 <sub>1</sub> yn                           |               |
| Moiety formula                                                | C <sub>17</sub> H <sub>12</sub> O <sub>2</sub> | C <sub>17</sub> H <sub>12</sub> O <sub>2</sub> |               |
| Sum formula                                                   | C <sub>17</sub> H <sub>12</sub> O <sub>2</sub> | C <sub>17</sub> H <sub>12</sub> O <sub>2</sub> |               |
| Mr                                                            | 248.27                                         | 248.27                                         |               |
| Dx, g cm <sup>-3</sup>                                        | 1.312                                          | 1.312                                          |               |
| Z                                                             | 4                                              | 4                                              |               |
| Mu (mm <sup>-1</sup> )                                        | 0.085                                          | 0.085                                          |               |
| F000                                                          | 520.0                                          | 520.0                                          |               |
| F000'                                                         | 520.25                                         |                                                |               |
| h, k, lmax                                                    | 6, 13, 28                                      | 6, 12, 28                                      |               |
| Nref                                                          | 2701                                           | 2616                                           |               |
| Tmin, Tmax                                                    | 0.982, 0.991                                   | 0.486, 1.000                                   |               |
| Tmin'                                                         | 0.982                                          |                                                |               |
| Correction method= # Reported T Limits: Tmin=0.486 Tmax=1.000 |                                                |                                                |               |
| AbsCorr = MULTI-SCAN                                          |                                                |                                                |               |
| Data completeness=                                            | 0.969                                          | Theta(max)= 26.881                             |               |
| R(reflections)=                                               | 0.0447 ( 2057)                                 | wR2(reflections)=                              |               |
| S =                                                           | 1.068                                          | 0.1265 ( 2616)                                 |               |
|                                                               | Npar= 172                                      |                                                |               |

Ellipsoid plot for 2-benzyl-naphthalene-1,4-dione (**3a**):

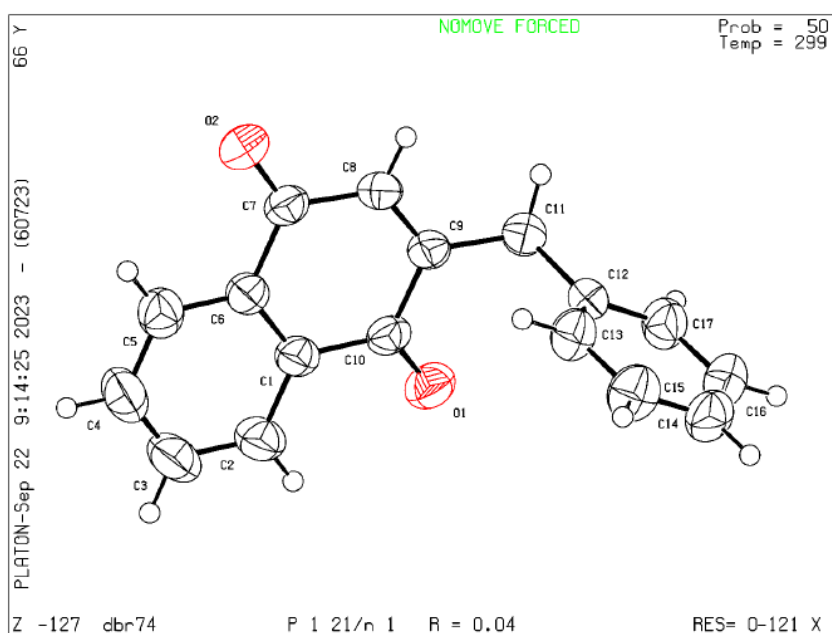

## X-Ray Single Crystal Data for 2-(3-fluorobenzyl)-naphthalene-1,4-dione (3c). The Ellipsoid Contour % Probability Levels are 50%

Crystallized from CHCl<sub>3</sub>-EtOAc; C<sub>17</sub>H<sub>11</sub>FO<sub>2</sub>; Mr = 266.26; monoclinic; space group = C 12/c<sub>1</sub>; A metallic yellowish yellow crystal of 0.22x0.2x0.18 mm<sup>3</sup> was used.

**Table S11.** Crystal data for 2-(3-fluorobenzyl)-naphthalene-1,4-dione **3c** (CCDC-2395507)

|                                                               |                |                    |                |
|---------------------------------------------------------------|----------------|--------------------|----------------|
| Bond precision:                                               | C-C = 0.0024 Å | Wavelength=0.71073 |                |
| Cell:                                                         | a=15.4575 (11) | b=7.5249 (6)       | c=21.8542 (18) |
|                                                               | alpha=90       | beta=93.640 (3)    | gamma=90       |
| Temperature:                                                  | 298 K          |                    |                |
|                                                               | Calculated     | Reported           |                |
| Volume                                                        | 2536.9(3)      | 2536.9(3)          |                |
| Space group                                                   | C 2/c          | C 1 2/c 1          |                |
| Hall group                                                    | -C 2yc         | -C 2yc             |                |
| Moiety formula                                                | C17 H11 F O2   | C17 H11 F O2       |                |
| Sum formula                                                   | C17 H11 F O2   | C17 H11 F O2       |                |
| Mr                                                            | 266.26         | 266.26             |                |
| Dx, g cm <sup>-3</sup>                                        | 1.394          | 1.394              |                |
| Z                                                             | 8              | 8                  |                |
| Mu (mm <sup>-1</sup> )                                        | 0.101          | 0.101              |                |
| F000                                                          | 1104.0         | 1104.0             |                |
| F000'                                                         | 1104.63        |                    |                |
| h, k, lmax                                                    | 20, 9, 28      | 20, 9, 28          |                |
| Nref                                                          | 3058           | 3052               |                |
| Tmin, Tmax                                                    | 0.978, 0.982   | 0.614, 0.746       |                |
| Tmin'                                                         | 0.978          |                    |                |
| Correction method= # Reported T Limits: Tmin=0.614 Tmax=0.746 |                |                    |                |
| AbsCorr = NONE                                                |                |                    |                |
| Data completeness=                                            | 0.998          | Theta(max)= 27.971 |                |
| R(reflections)=                                               | 0.0630 ( 2054) | wR2(reflections)=  |                |
| S =                                                           | 1.099          | 0.1642 ( 3052)     |                |
|                                                               | Npar= 181      |                    |                |

Ellipsoid plot for 2-(3-fluorobenzyl)-naphthalene-1,4-dione (**3c**):

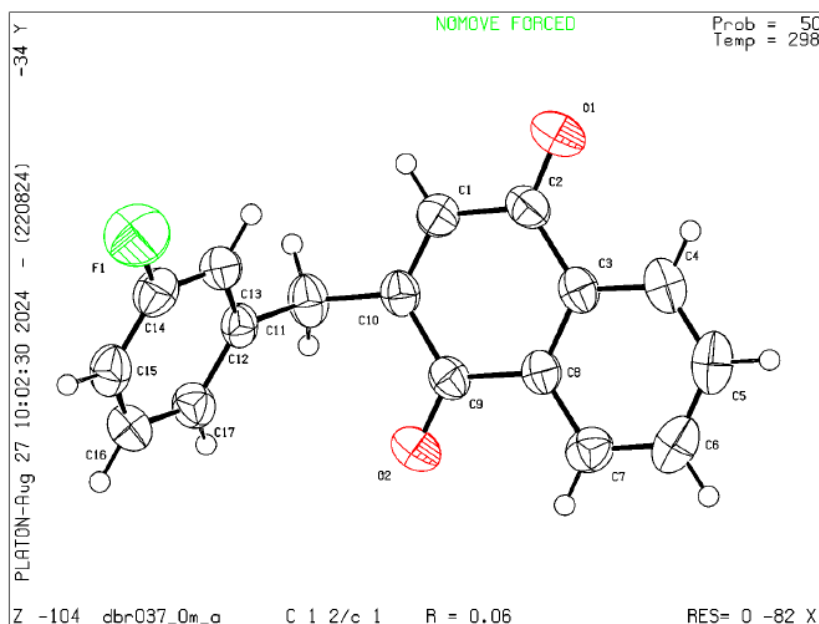

## X-Ray Single Crystal Data for 2-benzyl-3-chloronaphthalene-1,4-dione (4a). The Ellipsoid Contour % Probability Levels are 50%

Crystallized from CHCl<sub>3</sub>-EtOAc; C<sub>17</sub>H<sub>11</sub>ClO<sub>2</sub>; Mr = 282.71; triclinic; space group = P1;  
A metallic yellowish yellow crystal of 0.19x0.17x0.11 mm<sup>3</sup> was used.

**Table S12.** Crystal data for 2-benzyl-3-chloronaphthalene-1,4-dione **4a** (CCDC-2395508)

|                                                               |                  |                    |                 |
|---------------------------------------------------------------|------------------|--------------------|-----------------|
| Bond precision:                                               | C-C = 0.0047 Å   | Wavelength=0.71073 |                 |
| Cell:                                                         | a=4.9955(2)      | b=5.9148(3)        | c=11.7073(7)    |
|                                                               | alpha=103.743(2) | beta=98.978(2)     | gamma=97.252(2) |
| Temperature:                                                  | 298 K            |                    |                 |
|                                                               | Calculated       | Reported           |                 |
| Volume                                                        | 327.06(3)        | 327.06(3)          |                 |
| Space group                                                   | P 1              | P 1                |                 |
| Hall group                                                    | P 1              | P 1                |                 |
| Moiety formula                                                | C17 H11 Cl O2    | C17 H11 Cl O2      |                 |
| Sum formula                                                   | C17 H11 Cl O2    | C17 H11 Cl O2      |                 |
| Mr                                                            | 282.71           | 282.71             |                 |
| Dx, g cm <sup>-3</sup>                                        | 1.435            | 1.435              |                 |
| Z                                                             | 1                | 1                  |                 |
| Mu (mm <sup>-1</sup> )                                        | 0.289            | 0.289              |                 |
| F000                                                          | 146.0            | 146.0              |                 |
| F000'                                                         | 146.21           |                    |                 |
| h, k, lmax                                                    | 6, 7, 15         | 6, 7, 15           |                 |
| Nref                                                          | 2944 [ 1472]     | 2920               |                 |
| Tmin, Tmax                                                    | 0.947, 0.969     | 0.650, 0.746       |                 |
| Tmin'                                                         | 0.947            |                    |                 |
| Correction method= # Reported T Limits: Tmin=0.650 Tmax=0.746 |                  |                    |                 |
| AbsCorr = MULTI-SCAN                                          |                  |                    |                 |
| Data completeness=                                            | 1.98/0.99        | Theta(max)= 27.227 |                 |
| R(reflections)=                                               | 0.0375( 2512)    | wR2(reflections)=  |                 |
| S =                                                           | 1.021            | 0.0880( 2920)      |                 |
|                                                               | Npar= 181        |                    |                 |

Ellipsoid plot for 2-benzyl-3-chloronaphthalene-1,4-dione (**4a**):

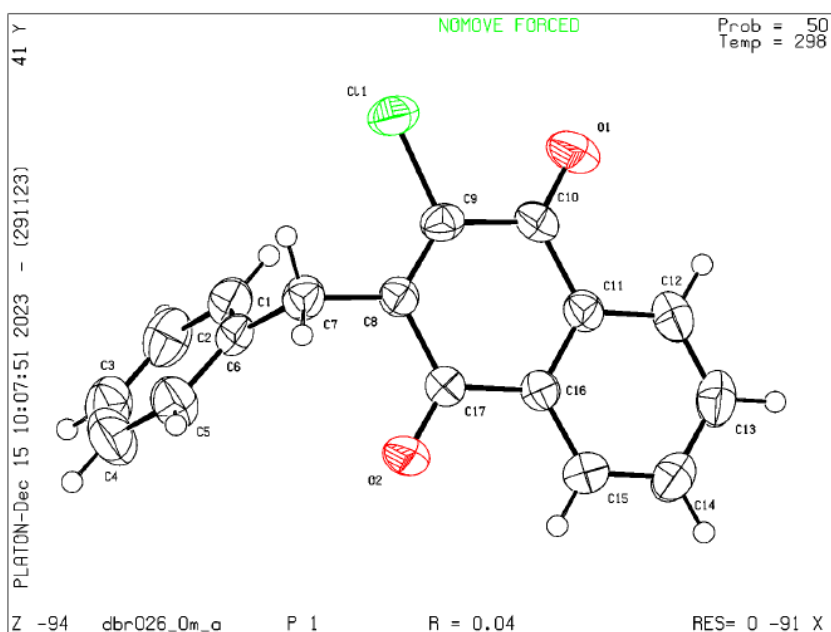

## X-Ray Single Crystal Data for 3-hydroxy-8,8-dimethyl-5,6,7,8-tetrahydrophenanthrene-1,4-dione (7). The Ellipsoid Contour % Probability Levels are 50%

Crystallized from  $\text{CHCl}_3$ -EtOAc;  $\text{C}_{16}\text{H}_{16}\text{O}_3$ ; Mr = 511.57; triclinic; space group = P-1;

A metallic yellowish yellow crystal of  $0.20 \times 0.19 \times 0.14 \text{ mm}^3$  was used.

**Table S13.** Crystal data for 3-hydroxy-8,8-dimethyl-5,6,7,8-tetrahydrophenanthrene-1,4-dione 7 (CCDC-2395509)

|                                                               |                        |                        |                 |
|---------------------------------------------------------------|------------------------|------------------------|-----------------|
| Bond precision:                                               | C-C = 0.0036 Å         | Wavelength=0.71073     |                 |
| Cell:                                                         | a=6.8522(5)            | b=12.7911(11)          | c=15.3647(12)   |
|                                                               | alpha=94.719(3)        | beta=102.333(3)        | gamma=90.643(3) |
| Temperature:                                                  | 301 K                  |                        |                 |
| Volume                                                        | Calculated             | Reported               |                 |
|                                                               | 1310.56(18)            | 1310.56(18)            |                 |
| Space group                                                   | P -1                   | P -1                   |                 |
| Hall group                                                    | -P 1                   | -P 1                   |                 |
| Moiety formula                                                | C16 H16 O3, C16 H15 O3 | C16 H16 O3, C16 H15 O3 |                 |
| Sum formula                                                   | C32 H31 O6             | C32 H31 O6             |                 |
| Mr                                                            | 511.57                 | 511.57                 |                 |
| Dx, g cm <sup>-3</sup>                                        | 1.296                  | 1.296                  |                 |
| Z                                                             | 2                      | 2                      |                 |
| Mu (mm <sup>-1</sup> )                                        | 0.089                  | 0.089                  |                 |
| F000                                                          | 542.0                  | 542.0                  |                 |
| F000'                                                         | 542.28                 |                        |                 |
| h, k, lmax                                                    | 9, 17, 20              | 9, 17, 20              |                 |
| Nref                                                          | 6584                   | 6530                   |                 |
| Tmin, Tmax                                                    | 0.982, 0.988           | 0.660, 0.746           |                 |
| Tmin'                                                         | 0.982                  |                        |                 |
| Correction method= # Reported T Limits: Tmin=0.660 Tmax=0.746 |                        |                        |                 |
| AbsCorr = MULTI-SCAN                                          |                        |                        |                 |
| Data completeness=                                            | 0.992                  | Theta(max)= 28.385     |                 |
| R(reflections)=                                               | 0.0795( 3965)          | wR2(reflections)=      |                 |
| S =                                                           | 1.079                  | 0.2523( 6530)          |                 |
|                                                               | Npar= 349              |                        |                 |

Ellipsoid plot for 3-hydroxy-8,8-dimethyl-5,6,7,8-tetrahydrophenanthrene-1,4-dione (7):

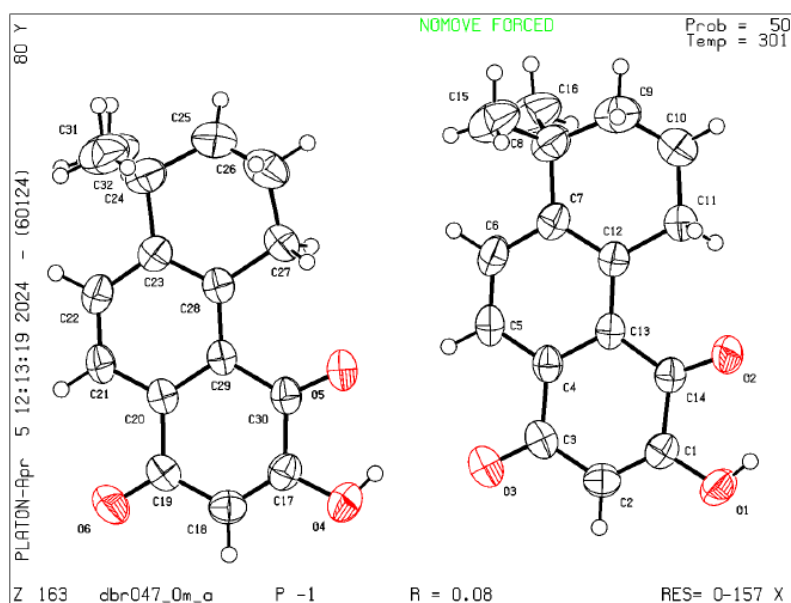

## References:

1. D. R. Laplace, B. Verbraeken, K. V. Hecke and J. M. Winne, *Chem. Eur. J.*, 2014, **20**, 253-262.
2. Q. -Y. Wei, Z. Zhou, M. -L. Yao, J. -K. Liu, B. Wu and J. -M. Yang, *Chem. Commun.*, 2023, **59**, 11520-11523.
3. (a) For the first reported synthesis of deoxyneocryptotanshinone, see: T. Hayashi, H. Kakisawa, H. -Y. Hsu and Y. P. Chen, *J. Chem. Soc. D*, 1970, 299a-299a; (b) For the first reported isolation of deoxyneocryptotanshinone in nature, see: Y. Ikeshiro, I. Hashimoto, Y. Iwamoto, I. Mase and Y. Tomita, *Phytochemistry* 1991, **30**, 2791-2792; (c) For the correlation NMR data of deoxyneocryptotanshinone, see: F. Eghtesadi, M. M. Farimani, N. Hazeri and J. Valizadeh, *SpringerPlus* 2016, **5**, 1068.
4. (a) For the first reported isolation of miltirone, see: T. Hayashi, H. Kakisawa, H. -Y. Hsu and Y. P. Chen, *J. Chem. Soc. D*, 1970, 299a-299a; (b) For the first reported synthesis of miltirone, see: D. Nasipuri and A. K. Mitra, *J. Chem. Soc., Perkin Trans. 1*, 1973, 285-287; (c) For the correlation of NMR data, see: J. Lee, H. S. Mei and J. K. Snyder, *J. Org. Chem.*, 1990, **55**, 5013-5016.
5. For the correlation NMR data of vitamin K<sub>3</sub>, see: S. -I. Murahashi, N. Miyaguchi, S. Noda, T. Naota, A. Fujii, Y. Inubushi and N. Komiya, *Eur. J. Org. Chem.*, 2011, 5355-5365.
6. A. L. Perez, G. Lamoureux and A. Herrera, *Synth. Commun.*, 2004, **34**, 3389-3397.
